# Supplementary material for: Preparing the prescription: a review of the aim and measurement of social referral programmes
Source: PubMed Central journal article supplement — BMJ Open. 2017 Oct 12;7(10):e017734. doi: 10.1136/bmjopen-2017-017734 (PMC5652530; doi:10.1136/bmjopen-2017-017734), 2017-10-12
Supplement: bmjopen-2017-017734.draft_revisions.pdf [file bmjopen-2017-017734.draft_revisions.pdf]

# BMJ Open

BMJ Open is committed to open peer review. As part of this commitment we make the peer review history of every article we publish publicly available.

When an article is published we post the peer reviewers' comments and the authors' responses online. We also post the versions of the paper that were used during peer review. These are the versions that the peer review comments apply to.

The versions of the paper that follow are the versions that were submitted during the peer review process. They are not the versions of record or the final published versions. They should not be cited or distributed as the published version of this manuscript.

BMJ Open is an open access journal and the full, final, typeset and author-corrected version of record of the manuscript is available on our site with no access controls, subscription charges or pay-per-view fees (<http://bmjopen.bmj.com>).

If you have any questions on BMJ Open's open peer review process please email [editorial.bmjopen@bmj.com](mailto:editorial.bmjopen@bmj.com)

# BMJ Open

## Preparing the prescription: A review of the aim and measurement of social referral programmes

|                                 |                                                                                                                                                                                                                                                                                                                    |
|---------------------------------|--------------------------------------------------------------------------------------------------------------------------------------------------------------------------------------------------------------------------------------------------------------------------------------------------------------------|
| Journal:                        | <i>BMJ Open</i>                                                                                                                                                                                                                                                                                                    |
| Manuscript ID                   | bmjopen-2017-017734                                                                                                                                                                                                                                                                                                |
| Article Type:                   | Research                                                                                                                                                                                                                                                                                                           |
| Date Submitted by the Author:   | 15-May-2017                                                                                                                                                                                                                                                                                                        |
| Complete List of Authors:       | Rempel, Emily; University of Bath, Department of Psychology<br>Wilson, Emma; University of Bath, Department of Psychology<br>Durrant, Hannah; University of Bath, Institute for Policy Research<br>Barnett, Julie; University of Bath, Department of Psychology; University of Bath, Institute for Policy Research |
| <b>Primary Subject Heading</b>: | Health services research                                                                                                                                                                                                                                                                                           |
| Secondary Subject Heading:      | General practice / Family practice, Mental health, Patient-centred medicine                                                                                                                                                                                                                                        |
| Keywords:                       | SOCIAL MEDICINE, MENTAL HEALTH, Organisation of health services < HEALTH SERVICES ADMINISTRATION & MANAGEMENT, PRIMARY CARE                                                                                                                                                                                        |
|                                 |                                                                                                                                                                                                                                                                                                                    |

SCHOLARONE™  
Manuscripts

1  
2  
3  
4  
5  
6  
7  
8  
9  
10  
11  
12  
13  
14  
15  
16  
17  
18  
19  
20  
21  
22  
23  
24  
25  
26  
27  
28  
29  
30  
31  
32  
33  
34  
35  
36  
37  
38  
39  
40  
41  
42  
43  
44  
45  
46  
47  
48  
49  
50  
51  
52  
53  
54  
55  
56  
57  
58  
59  
60

**Title:**

# **Preparing the prescription: A review of the aim and measurement of social referral programmes**

**Corresponding Author:**

**Emily S. Rempel<sup>1</sup>**

Department of Psychology, University of Bath  
Claverton Down, Bath, United Kingdom  
BA2 7AY

Email: [E.S.Rempel@bath.ac.uk](mailto:E.S.Rempel@bath.ac.uk)

Phone: 01225 384573

**Co-Authors:**

**Emma N. Wilson<sup>1</sup>**

**Hannah Durrant<sup>2</sup>**

**Julie Barnett<sup>1,2</sup>**

<sup>1</sup> Department of Psychology, University of Bath  
Bath, United Kingdom, BA2 7AY

<sup>2</sup> Institute for Policy Research, University of Bath  
Bath, United Kingdom, BA2 7AY

**Word count:** 3495 words

## ABSTRACT

**Objective:** Our aim was to systematically review, and qualitatively evaluate, the aims and measures of social referral programmes. Our first objective is to identify the aims of social referral initiatives. Our second objective is to identify the measures used to evaluate whether the aims of social referral were met.

**Design:** Systematic literature review.

**Background:** Social referral programmes, also called social prescribing and emergency case referral, link primary and secondary health care with community services, often under the guise of decreasing health system costs.

**Method:** Following the PRISMA guidelines we undertook a literature review to address that aim. We searched in five academic online databases and in one online non-academic search engine, including both academic and grey literature, for articles referring to 'social prescribing' or 'community referral'.

**Results:** We identified 41 relevant articles and reports. After extracting the aims, measures and type of study, we found that most social referral programmes aimed to address a wide variety of system and individual health problems. This included cost savings, resource reallocation and improved mental, physical and social wellbeing. Across the 41 studies and reports, there were around 133 different kinds of measures or methods of evaluation used. Of these, the most commonly used individual measure was the Warwick-Edinburgh Mental Wellbeing Scale, used in nine studies and reports.

**Conclusions:** These inconsistencies in aims and measures used, pose serious problems when social prescribing and other referral programmes are often advertised as a solution to health services budgeting constraints, as well as a range of chronic mental and physical health conditions. We recommend researchers and local community organisers alike critically evaluate for whom, where and why their social referral programmes 'work'.

## ARTICLE SUMMARY

### Strengths and limitations of this study

- A strength of this study was the inclusion of both grey and academic literature to ensure a broad representation of social referral programmes.
- A strength of this study was the systematic nature of the literature search, following PRISMA guidelines and including two independent reviewers.
- A limitation of this study was, that although systematic, there is no guarantee of an entirely comprehensive inclusion of all relevant articles, for example we only accessed articles and reports available online or through the British Library.
- A limitation of this study was the use of the search term 'social prescribing' as this is a generalised UK region-specific term, however this is the term used colloquially to describe social referral programmes.

## INTRODUCTION

“The tonic effect of fun and play has long been recognized as an antidote to the stresses, worries, labors, and responsibilities of our workaday life... we must diagnose and prepare the prescription.”<sup>1</sup> In 1958, Walt Disney wrote this commentary on film and American life for the 75<sup>th</sup> anniversary of the Journal of the American Medical Association. Although few would argue Disney was a great early adopter of the social determinants of health model, this demonstrates a timely understanding of the impact of social activities on well-being. Academic research demonstrates that social well-being is closely tied to physical health, a well-known example being the impact of socioeconomic positioning on mortality as demonstrated in the Whitehall Studies, as well as other more recent work by Michael Marmot<sup>2,3</sup>. Though this common understanding has not fully translated into clinical practice and public health. Particularly in the context of publicly funded medical systems like the United Kingdom’s National Health Service (NHS), resource limitations and unclear evidence on the causal mechanisms between social activities and improved health make it challenging to incorporate social well-being in treatment models<sup>4</sup>.

Over the past decade, one proposed method of addressing this linking up of health and care services is referral out of primary care health systems and in to the community<sup>5,6</sup>. This ‘emerging model of care’ was alluded to in the NHS 5 Year Forward View<sup>7</sup> in the context of health care needing to move to a partnership rather than discrete episodes of treatment. More substantially, social prescribing was recommended as a key resource for primary care, noting that “non-medical interventions such as social prescribing can contribute to primary care teams meeting the physical, psychological and social care needs of an individual in the round”<sup>8</sup> (pg.7). Sometimes with alternative descriptors such as ‘community referral’, ‘community links’, and ‘arts on prescription’, these programmes link health care to opportunities and events provided by third sector organisations. A rapid evidence review by

1  
2  
3 the University of York defined '[social] prescribing [as] a way of linking up patients in  
4 primary care with sources of support in the community', however the authors highlight that  
5 there is no agreed definition<sup>9</sup>. It is theorised that these types of programmes improve social  
6 well-being through group and individual community activities and, ultimately, physical and  
7 mental health. Although social prescribing is a commonly used term, we use 'social referral'  
8 to be as inclusive as possible in describing links between health care and third sector  
9 organisations. In cases where a study specifically uses terms like 'arts on prescription' or  
10 'social prescribing' we refer to it as such. We also do not specify primary care as the only  
11 source of social referral, we include referrals by other health care workers.  
12  
13  
14  
15  
16  
17  
18  
19  
20  
21  
22

23  
24 Evidence for the effectiveness of social referral services has been characterised as  
25 inconclusive<sup>9</sup>. Although there is significant, if piecemeal, investment in social referral  
26 programmes and many advocates of their value<sup>7 10</sup> attempts to summarise the current  
27 evidence, and thus address these criticisms, have similarly been inconclusive in evidencing  
28 the health, social, or service-related benefits of social referral<sup>11-15</sup>. Mossabir, et al.<sup>13</sup>  
29 conducted a scoping review of seven studies on social prescribing and found that although  
30 potentially beneficial for psychosocial health, there had been too few empirical studies to  
31 draw clear conclusions. The University of York Centre for Reviews and Dissemination<sup>9</sup> goes  
32 as far as to argue 'there is little in the way of supporting evidence of effect to inform the  
33 commissioning of a social prescribing programme'(pg. 4).  
34  
35  
36  
37  
38  
39  
40  
41  
42  
43  
44  
45

46  
47 The first step in evaluating any programme is determining what it aims 'to do' and  
48 deciding on the measures that will be used to ascertain effectiveness. There has thus far been  
49 little reflection on the intended aims of social referral and the measures used to judge whether  
50 the aims have been met. Accordingly, our purpose is to summarise the aims and measures of  
51 social referral through a systematic review of the literature. Our first objective is to identify  
52 the aims of social referral initiatives. Our second objective is to identify the measures used to  
53  
54  
55  
56  
57  
58  
59  
60

1  
2  
3 evaluate whether the aims of social referral were met. This creates a foundation to inform  
4  
5 further programme development and evaluation and for theorising the various mechanisms  
6  
7 that may, in specified contexts, be responsible for changes in particular outcomes. We can  
8  
9 thus better understand what is meant by ‘social prescription’ with a view to informing  
10  
11 evaluations to consider the contexts in which social prescribing works, for whom and through  
12  
13 which mechanisms<sup>16</sup>.  
14  
15

## 16 17 **LITERATURE SEARCH METHODOLOGY**

18  
19 As part of the ‘Collaborating to Deliver Social Prescribing in Bath and North East  
20  
21 Somerset’ project we conducted a review of empirical and grey literature related to ‘social  
22  
23 prescribing’. We identified PubMed suggested terms associated with SP. The final terms  
24  
25 were ‘social prescribing’, ‘social prescribing services’, ‘social prescription’, ‘social  
26  
27 prescriptions’, ‘community referrals’, ‘community referred’, ‘community referred patients’,  
28  
29 ‘community refers’ OR ‘community referring physicians’. We searched SCOPUS, Web of  
30  
31 Science, PubMed, NICE Evidence Guidelines database and PsycNET for academic peer-  
32  
33 reviewed articles. We also hand searched the reference and citation lists of the peer-reviewed  
34  
35 articles. We also hand searched the reference and citation lists of the peer-reviewed  
36  
37 articles. Finally, we examined the first five pages of results identified by internet search  
38  
39 engine Google to identify grey literature reports related to ‘social prescribing’. After the  
40  
41 online database search, academic and non-academic literature reference lists were hand-  
42  
43 searched. Only the academic literature’s citations were searched as several of the non-  
44  
45 academic reports were not held on an academic database therefore citation searches could not  
46  
47 be conducted. The initial search, including citations and reference searching, took place in  
48  
49 February 2016 and an updated search was conducted in November 2016 to include recent  
50  
51 articles and reports.  
52  
53  
54  
55  
56  
57  
58  
59  
60

1  
2  
3 Identified articles were deemed relevant for inclusion if they reported the assessment  
4 of a referral programme of patients from a health context to a social context. A health context  
5 was considered any form of health or mental care, for example emergency departments,  
6 primary care, and mental health professionals. A social context was considered any form of  
7 community programme including cultural programmes, arts classes, or community groups.  
8 This excluded programmes evaluating a single programme, e.g. a diabetes health  
9 management courses. We excluded these 'single intervention' studies as by definition social  
10 referral programmes are premised on referring an individual to a range of interventions. After  
11 searching using this broad criteria, additional inclusion criteria were added due to the  
12 unexpected range of study methodologies, including many interview studies focused on  
13 clinical or provider perspectives. These criteria included the use of empirical methodology  
14 (qualitative, mixed methods, or quantitative), assessment of a patient sample and the  
15 production of a final article or report. This therefore excluded empirical articles that were  
16 evaluating the service provider's views of a social referral programme. Reports or articles  
17 that were not in their final version (e.g. commissioner or funding interim reports) were  
18 excluded as were conference reports and book chapters. No language or region restrictions  
19 were applied. After identification of relevant articles and reports, we extracted the study type,  
20 stated aim(s), and measures of each social referral programme. We categorised each study's  
21 aim(s) as mental, health, social, service use, service cost, and/or other and also extracted  
22 number of aims and whether a study aimed to address both individual and system-level aims.  
23 We did not assess study quality as we were not concerned with the results of social referral  
24 only the stated aims and measures. We also extracted the social referral programme name,  
25 study design, referral criteria, programme location, programme type, number of programme  
26 participants, and number of study participants.  
27  
28  
29  
30  
31  
32  
33  
34  
35  
36  
37  
38  
39  
40  
41  
42  
43  
44  
45  
46  
47  
48  
49  
50  
51  
52  
53  
54  
55  
56  
57  
58  
59  
60



1  
2  
3 The first coder, E. Rempel, developed the initial coding framework and the second  
4  
5 coder, E. Wilson, separately coded all articles to this framework, any differences between the  
6  
7 coding of aims or measures were subsequently discussed and agreed upon. Due to the  
8  
9 qualitative nature of the review, we did not calculate percentage agreement.  
10

## 11 12 **RESULTS**

13  
14  
15 The initial academic database search resulted in 603 articles. After duplicate removal,  
16  
17 title and abstracts were reviewed according to inclusion and exclusion criteria, 41 articles  
18  
19 were identified. On assessment of these full-text articles, 20 were removed for being non-  
20  
21 empirical (e.g. discussion or review articles that did not evaluate a specific social referral  
22  
23 programme but rather provided a general discussion on social prescribing), two were  
24  
25 removed for containing non-patient samples and one was removed as it was a book chapter.  
26  
27 After a forwards and backwards citation search, a further 23 articles were identified as  
28  
29 relevant. At the initial February 2016 search, six review articles or articles with non-patient  
30  
31 samples were also hand-searched for references and citations. Three non-academic articles  
32  
33 referenced in grey literature reports that may have been relevant could not be found as copies  
34  
35 of these reports were not held online, were not available through inter-library loans and were  
36  
37 not held at the British Library. Furthermore after contacting the citing author and place of  
38  
39 publication, these articles could still not be found. In total, 41 texts were analysed. See Figure  
40  
41  
42 1 for a PRISMA diagram of the search strategy and results.  
43  
44  
45

46  
47 Of the 41 empirical studies, seven were qualitative, 17 were quantitative and 18  
48  
49 employed mixed methodologies. Figure 2 outlines the process of ‘social referral’ programmes  
50  
51 described in these studies. The broad nature of the search, led to a broad range of  
52  
53 programmes but all followed the basic outline seen in Figure 2. There was considerable  
54  
55 variation in indicators of need, referral process and types of activities undertaken. For  
56  
57  
58  
59  
60

1  
2  
3 example, emergency case management as described by Lee and Davenport<sup>18</sup> specifies the  
4  
5 population as those who have three or more emergency department visits per month, as well  
6  
7 as a list of specific health concerns, e.g. no general practitioner. Their referral process is  
8  
9 nurse-led case management, where they refer to community services as well as other health  
10  
11 services. The activities varied including both community-based as well as more traditional  
12  
13 health referrals. In contrast, Stickley and Hui<sup>19</sup> describe a prescriptive arts programme. They  
14  
15 do not specify a population, only the referral mechanism. The referral was from a primary or  
16  
17 secondary mental health worker. The activity was a ten-week arts programme and the  
18  
19 anticipated outcome was personal health improvement. Appendix 1 outlines the various types  
20  
21 of programmes and study designs. Of the 41 studies, there were 38 unique social referral  
22  
23 projects. There were two repeated programmes (Arts on Prescription and the BRIGHT trial),  
24  
25 however the four studies were all individual evaluations of these services. As well the Health  
26  
27 Trainer and Social Prescribing Service<sup>17</sup> was based on a previous pilot of the CHAT  
28  
29 programme<sup>12</sup>. The majority of these texts described either a social prescription programme or  
30  
31 an emergency department case management programme. All of the social prescribing  
32  
33 programmes were set in the United Kingdom. The emergency department case management  
34  
35 programmes were located in the United States, United Kingdom, Canada and Taiwan. All  
36  
37 studies included only adult populations with study size ranging from four to 784. Patient  
38  
39 samples varied greatly, from kidney patients to elderly adults. Programme size also greatly  
40  
41 varied from 12 to 1848 referrals. See Appendices 1 and 2 for more details.  
42  
43  
44  
45  
46  
47  
48  
49  
50  
51  
52  
53  
54  
55  
56  
57  
58  
59  
60

**Table 1:** Summary of Aims of Social Referral Programmes\* (n=41)

| Aim Level                                                  | Core Aim                                                                           | Stated Aim                                                                            | Number of References |
|------------------------------------------------------------|------------------------------------------------------------------------------------|---------------------------------------------------------------------------------------|----------------------|
| Individual Level Aim                                       | Improved Mental Well-being                                                         | To enhance skills/behaviours that improve mental wellbeing. <sup>20</sup>             | 25                   |
|                                                            |                                                                                    | To help individual retain/recover functional capacity to study or work. <sup>21</sup> |                      |
|                                                            |                                                                                    | To improve/address psychosocial health <sup>22-26</sup>                               |                      |
|                                                            |                                                                                    | To improve mental health and well-being. <sup>5 19 20 27-39</sup>                     |                      |
|                                                            |                                                                                    | To improve patient quality of life <sup>39 40</sup>                                   |                      |
|                                                            | Improved Physical Well-being                                                       | To improve resilience, confidence, and self-esteem. <sup>37 41</sup>                  |                      |
|                                                            |                                                                                    | To improve spiritual well-being <sup>5</sup>                                          |                      |
|                                                            |                                                                                    | To support emotional needs. <sup>42</sup>                                             |                      |
|                                                            |                                                                                    | To empower and support individuals to choose a healthier lifestyle. <sup>39</sup>     |                      |
|                                                            |                                                                                    | To improve physical health and well-being. <sup>5 18 22 28-30 32 34 35 43-46</sup>    |                      |
| Improved Social Well-being                                 | To improve self-assessed health status. <sup>47</sup>                              | 16                                                                                    |                      |
|                                                            | To support the self-management of long-term health conditions. <sup>29 43 48</sup> |                                                                                       |                      |
|                                                            | To increase connection to community-based support. <sup>20 28</sup>                |                                                                                       |                      |
|                                                            | To improve/address psychosocial health. <sup>22-26</sup>                           |                                                                                       |                      |
|                                                            | To improve resilience, confidence, and self-esteem. <sup>41</sup>                  |                                                                                       |                      |
| Other                                                      | To improve social inclusion/engagement. <sup>21 23 29 30 33 34</sup>               | 21                                                                                    |                      |
|                                                            | To improve social well-being <sup>32 35 45</sup>                                   |                                                                                       |                      |
|                                                            | To support social needs/outcomes. <sup>17 27 42 46 49</sup>                        |                                                                                       |                      |
| System Level Aim                                           | Optimised Health Service Use                                                       | To address practical needs e.g. employment. <sup>42</sup>                             | 2                    |
|                                                            |                                                                                    | To improve connection to nature. <sup>30</sup>                                        |                      |
|                                                            |                                                                                    | To broaden health service provision in the community <sup>12</sup>                    |                      |
|                                                            |                                                                                    | To improve service use. <sup>23</sup>                                                 |                      |
|                                                            |                                                                                    | To increase take-up of community activities <sup>20 29 37</sup>                       |                      |
|                                                            |                                                                                    | To optimise health care coordination <sup>50</sup>                                    |                      |
|                                                            |                                                                                    | To provide appropriate arts course recommendations. <sup>37</sup>                     |                      |
|                                                            |                                                                                    | To provide better management of psychosocial problems in primary care <sup>40</sup>   |                      |
|                                                            |                                                                                    | To reduce emergency department use/acute hospital care. <sup>18 26 28 44 51 52</sup>  |                      |
|                                                            |                                                                                    | To reduce health service use <sup>31 35 46 47 50 53</sup>                             |                      |
| To reduce hospital care use. <sup>29 52 54</sup>           |                                                                                    |                                                                                       |                      |
| To reduce primary care service use. <sup>17 25 28 29</sup> |                                                                                    |                                                                                       |                      |
| To support the self-management of long-term                |                                                                                    |                                                                                       |                      |

|                               |                                                                           |   |
|-------------------------------|---------------------------------------------------------------------------|---|
|                               | physical or mental health conditions <sup>37 43 48</sup>                  |   |
| Decreased Health Service Cost | To reduce cost associated with long-term health conditions. <sup>43</sup> | 6 |
| Other                         | To reduce health services costs <sup>5 26 35 46 53</sup>                  |   |
|                               | To reduce environmental cost (carbon footprint) <sup>53</sup>             | 1 |

\*Aims of social referral programmes, not study aims.

Table 1 outlines the aims of the programmes described in the empirical studies. The stated aims were those listed in the individual studies, while the core aims were derived by grouping together similar aims across programmes. The core aims were then grouped in relation to the level at which the intervention was aimed: individual or system. The core individual aims identified included improved mental well-being, improved physical well-being and improved social well-being. The core system level aims included optimised health service use and decreased health service cost. Only nine studies stated a single aim. The majority of studies thus stated multiple aims: 16 stated two, 10 stated three, four stated four and one study stated five aims. Nineteen studies focused on both individual and system level outcomes (see Supplementary Appendix 2 for full details). Improved mental well-being was the most common core aim, with 25 of 41 studies. Physical well-being, social well-being and optimised service use were also frequently cited with 16, 21 and 23 studies, respectively. Six studies addressed the least common core aim of cost savings.

The mental well-being core aim was generally characterised by mental health or general well-being. Improved psychosocial state was considered to be both related to social and mental well-being. Physical well-being included both general health and the improvement of long term health conditions, like kidney disease. Social well-being included improvements in social and community engagement and quality of life. Health service use and cost aims included reductions in emergency department use, GP use, hospital stay length and other forms of primary care costs. The service use aim also included instances where

researchers were aiming to increase the uptake of community services. See Appendix 2 for more detail on aims.

Table 2 outlines the measures and methods used to evaluate the social referral projects by frequency. Across all aims these included administrative data/analysis, physical health questionnaires, mental health diagnostic measures, qualitative assessments and social/behavioural questionnaires. Across the 41 studies and reports, there were around 133 different kinds of measures or methods of evaluation used. Twenty-one measures or methods were used more than once, however many of these were forms of administrative data counts. The most commonly used scale was the Warwick-Edinburgh Mental Well-being Scale, used in nine studies.

**Table 2:** Measures and Methods Used in Studies/Reports of Social Referral by Frequency (n=41)\*

| <b>Measure/Method</b>                                     | <b>Number of Studies/Reports Using Measure/Method</b> | <b>Examples of Programme Aims Addressed**</b>                                               |
|-----------------------------------------------------------|-------------------------------------------------------|---------------------------------------------------------------------------------------------|
| Semi-structured interviews to explore patient experience. | 14                                                    | n/a***                                                                                      |
| Warwick Edinburgh Mental Wellbeing Short Scale            | 9                                                     | Improved Mental Well-being<br>Improved Physical Well-being<br>Improved Social Well-being    |
| Number of GP Appointments (administrative)                | 6                                                     | Optimised Health Service Use<br>Reduced Health Service Cost<br>Improved Physical Well-being |
| Short case description of participant experience          | 6                                                     | Improved Physical Well-being<br>Improved Social Well-being<br>Optimised Health Service Use  |
| Demographic questions                                     | 5                                                     | Improved Mental Wellbeing.                                                                  |
| Cost Analysis                                             | 5                                                     | Reduced Health Service                                                                      |

|                                                                                            |   |                                                                   |
|--------------------------------------------------------------------------------------------|---|-------------------------------------------------------------------|
|                                                                                            |   | Cost<br>Optimised Health<br>Service Use                           |
| Hospital Anxiety and Depression Scale                                                      | 5 | Improved Mental Well-being<br>Improved Physical Well-being        |
| Focus group with patients to explore patient outcomes                                      | 4 | n/a***                                                            |
| Emergency Department Admissions/Hospital Episode Statistics (administrative)               | 6 | Optimised Health<br>Service Use                                   |
| General Health Questionnaire-12                                                            | 3 | Improved Mental Wellbeing<br>Improved Physical Wellbeing          |
| Number of Secondary Referrals (administrative)                                             | 3 | Optimised Health<br>Service Use<br>Reduced Health Service<br>Cost |
| Geriatric Depression scale                                                                 | 2 | Improved Mental<br>Wellbeing                                      |
| Focus Group with family members who engaged with the service to explore service experience | 2 | n/a***                                                            |
| Hospital Admissions Length (administrative)                                                | 2 | Optimised Health<br>Service Use                                   |
| Reason for Referral                                                                        | 2 | Improved Mental<br>Wellbeing<br>Optimised Health<br>Service Use   |
| Referral records (e.g. what activities were referred to)                                   | 2 | Improved Social<br>Wellbeing<br>Reduced Health Service<br>Cost    |
| Social Return on Investment Analysis                                                       | 2 | Improved Mental<br>Wellbeing                                      |
| Work and Social Adjustment Scale                                                           | 2 | Improved Social<br>Wellbeing                                      |
| Number of Hospital Admissions (administrative)                                             | 2 | Optimised Health<br>Service Use                                   |
| Number of Prescriptions for Psychosocial Reasons (administrative)                          | 2 | Optimised Health<br>Service Use<br>Improved Mental<br>Wellbeing   |

\*Where the measure or method was used in n>1 report or study.

\*\*These are only example aims because it was not always clear how each aim and measure matched up

\*\*\*Not applicable as the qualitative semi-structured interviews and focus groups were exploratory and did not have a specific programme aim to measure.

## DISCUSSION

Examination of the aims of studies seeking to evaluate social referral initiatives and the measures used to evaluate their outcome has revealed extensive heterogeneity. This is unsurprising considering the variability in populations and types of programmes and is not problematic per se. We will discuss the various aims of social referral and the implications of the variety of measures used before considering what this variability means for the future of social referral programmes. In doing so it is important to reiterate the hugely varied nature of the events and opportunities to which people are being referred, as well as the substantial variety of recipients of this referral. Whilst we expect variation in programme aims and measures, these varied programmes were included because they all aimed to link individuals with community and health care services. It is therefore reasonable to assume that there would be some kind of consistency in how they measured and evaluated that 'linking up'.

### *Aims of social referral*

The vast majority of studies, 32 out of the total 41, included multiple aims. Nineteen of these were concerned with both individual and system level outcomes (see Table 1 and Supplementary Appendix 2), for example mental wellbeing and health service costs. While a single study containing aims at individual and system level is not problematic as such, what is problematic is the lack of articulation of the presumed causal pathways from the treatment programme to improved individual health and to better health care resource allocation. As a thought experiment, an individual who is a frequent health service user and has poor control over their diabetic care could, in theory, be empowered by a social referral service and continue high levels of primary care access as they take greater ownership of their health. Indeed a few studies have found an uptake in medical service use post-social referral<sup>34 53 54</sup>. It

1  
2  
3 is reasonable for programmes to try to address multiple aims, however it is not acceptable for  
4  
5 these programmes not to theorise, test and critically evaluate the relationship between them.  
6

### 7 *Measures of social referral*

8  
9  
10 Measuring what ‘works’ is inherently linked to defining what these programmes  
11  
12 intend to do and requires meaningful, specific and comparable indices. The diversity of  
13  
14 measures evident in social referral initiatives, often associated with a series of vaguely similar  
15  
16 aims, suggests that what programmes are aiming to do is often unclear. As seen in Table 2,  
17  
18 measures used in social referral initiatives are considerably more plentiful than their aims.  
19  
20 For example, Bragg, et al.<sup>30</sup> used 12 different tools in their evaluation of an eco-therapy  
21  
22 programme. The multiple measures both within and between studies renders comparability  
23  
24 between studies, even those addressing the same or similar aims, impossible. Similarly, we  
25  
26 could not meaningfully narrow them to provide recommendations on preferred measures.  
27  
28 Where there were multiple aims, papers rarely stated which measure was meant to address  
29  
30 which aim. While we might infer that administrative counts of GP visits would measure GP  
31  
32 use, it is less clear how GP visits would relate to physical wellbeing. Clarity of reporting in  
33  
34 the hypothesised relationship between aims and outcomes measures is vital in understanding  
35  
36 the causal mechanism between a programme and an outcome. From one perspective,  
37  
38 measuring the same outcome in several ways could lead to a more robust proof of effect. In  
39  
40 theory this could lead to a stronger evidence base about the effect of social referral on  
41  
42 individual and system level outcomes. A less generous explanation behind the proliferation of  
43  
44 measures is that researchers and evaluators do not have a definitive understanding of what  
45  
46 exactly the exact aim of their social referral service is. It certainly suggests that one of the  
47  
48 essential building blocks for an evaluation of a complex health system<sup>55</sup>, that is establishing  
49  
50 what the existing evidence is, has not been established.  
51  
52  
53  
54  
55  
56  
57  
58  
59  
60



1  
2  
3 In the final analysis, whilst there is a notable policy push for the implementation of  
4 social referral programmes, definitive and systematic evaluations of social referral  
5 programmes are not possible while aims and measures are so inconsistent. We hope that this  
6 review provides a first step towards categorising the aims of social referral programmes, i.e.  
7 to improve physical, mental, and social health, as well as reducing costs and improving health  
8 care resource allocation. Although these aims are broad, they provide a framework for  
9 highlighting what it is programmes intend to do, and not do, and identifying which measures  
10 might best be used to assess different types of aims. This would be a start in applying a more  
11 consistent methodology.  
12  
13  
14  
15  
16  
17  
18  
19  
20  
21  
22  
23

24 The solution to the issue of aim and measurement variability in programmes is not to  
25 give up on social referral in general. Certainly the incorporation of social and mental well-  
26 being within traditional biomedical health systems seems an essential step in tackling  
27 relatively recent problems in health care, e.g. services for aging populations, and may create  
28 new opportunities for people who are stagnated in their ability to access services that improve  
29 their health. However at this time, despite policy claims of value and claims of the  
30 effectiveness of individual programmes, reviews of these programmes are clear that we do  
31 not have evidence that this is the case<sup>9 12-15 56-58</sup>. We would argue that whilst aims and  
32 measures remain diffuse and the links between them under theorised and under specified that  
33 we actually *cannot* know that this is the case. We call on researchers and evaluators alike to  
34 consider the active ingredients of their programmes and in doing so echo a similar call made  
35 by the University of York asking, simply, for whom, in what context, how, and why do they  
36 intend to prescribe social activities<sup>9</sup>? And while these can be challenging to answer, if we do  
37 not know the answers to these simple questions, how can we possibly prepare a prescription?  
38  
39  
40  
41  
42  
43  
44  
45  
46  
47  
48  
49  
50  
51  
52  
53  
54

### 55 **Strengths and weaknesses**

56  
57  
58  
59  
60

1  
2  
3 Although systematic, we cannot guarantee this is a comprehensive review of all social  
4 referral programmes. ‘Social prescribing’ is a generalised UK region-specific term for  
5 medical-based referral to non-medical services. There are likely social referral-like  
6 programmes in other countries that are not easily identified. Every effort was made to be as  
7 inclusive as possible in phrasing but there will inevitably be some studies missed.  
8  
9 Conversely, the strength of our analysis is our inclusion of both grey and academic literature.  
10  
11 By including non-academic reports we analysed valuable literature that would normally not  
12 be included in reviews. As well, this review is a first step in creating consistency and  
13 justification for the inclusion of social referral programmes in broader nationwide initiatives  
14 to address the social ills of health. The contribution of our approach to reviewing social  
15 referral is valuable due to its focus on aims and measures rather than, as is the case in other  
16 reviews, the outcomes of programmes.  
17  
18  
19  
20  
21  
22  
23  
24  
25  
26  
27  
28

## 30 CONCLUSION

31  
32  
33 This review aimed to analyse and summarise the aims and measures used in the  
34 evaluation of social referral programmes. Social referral is variously described as social  
35 prescribing, community referral and emergency case management among other terms. We  
36 found great variation in the aims of these projects including aims to improve mental well-  
37 being, physical health, social well-being and costs savings. We further found that measures  
38 used to analyse these aims were highly varied. We would suggest that a next step to  
39 addressing the social determinants of health in primary and secondary care is to derive more  
40 differentiated and concrete definitions of social referral that more specifically reflect what  
41 practitioners and commissioners intend for programmes to achieve and thus to dispense with  
42 a general notion of social referral often uncritically considered as the ‘golden child’ of cost  
43 savings and improved mental health. However, by setting clear aims and using appropriate  
44 measures, social referral can move beyond pilot studies and in to general practice. To that  
45  
46  
47  
48  
49  
50  
51  
52  
53  
54  
55  
56  
57  
58  
59  
60

1  
2  
3  
4  
5  
6  
7  
8  
9  
10  
11  
12  
13  
14  
15  
16  
17  
18  
19  
20  
21  
22  
23  
24  
25  
26  
27  
28  
29  
30  
31  
32  
33  
34  
35  
36  
37  
38  
39  
40  
41  
42  
43  
44  
45  
46  
47  
48  
49  
50  
51  
52  
53  
54  
55  
56  
57  
58  
59  
60

end, we must endeavour to respond to Walt Disney’s call to “diagnose and prepare the prescription”<sup>1</sup>.

For peer review only

## STATEMENTS

### Funding

This work was supported by Innovate UK, project code: 102412-399209.

### Data Sharing

Full coding guidelines and summaries for all articles included can be found in the Supplementary Appendix 1 and Supplementary Appendix 2.

### Competing Interests

None declared.

### Contributions

ESR, JCB and HD designed the study protocol. ESR conducted the database searching, while ESR and ENW conducted the data extraction. The report was written by ESR and JCB. All authors edited the manuscript.

### Acknowledgements

The authors would like to acknowledge the support of the 'Collaborating to Deliver Social Prescribing in Bath and North East Somerset' Project Team, including Digital Algorithms Ltd.

## References

1. Disney W. Film entertainment and community life. *The Journal of the American Medical Association* 1958;**167**(11):1342-45.
2. Marmot M, UCL Institute of Health Equity. Review of social determinants and the health divide in the WHO European Region: final report. Copenhagen: WHO Regional Office for Europe, 2014.
3. Marmot MG, Stansfeld S, Patel C, et al. Health inequalities among British civil servants: the Whitehall II study. *The Lancet* 1991;**337**(8754):1387-93.
4. Marshall M. A precious jewel-The role of general practice in the English NHS. *New England Journal of Medicine* 2015;**372**(10):893-97.
5. Kimberlee R, Ward R, Jones M, et al. Proving our value: Measuring the economic impact of Wellspring Health Living Centre's social prescribing *Wellbeing Programme* for low level mental health issues encountered by GP services. Bristol: University of the West of England, 2014.
6. Kimberlee R. Developing a Social Prescribing approach for Bristol: University of the West of England, 2013.
7. NHS. NHS Five Year Forward View. England: National Health Institute, 2014.
8. Dyson B. Improving general practice: A call to action – phase one report. London, UK: NHS England, 2014.
9. The University of York Centre for Reviews and Dissemination. Evidence to inform the commissioning of social prescribing. York: University of York, 2015.
10. Kimberlee R. What is social prescribing? *Advances in Social Sciences Research Journal* 2015;**2**(1):102-10.
11. Bungay H, Clift S. Arts on Prescription: A review of practice in the UK. *Perspectives in Public Health* 2010;**130**(6):277-81.
12. South J, Higgins TJ, Woodall J, et al. Can social prescribing provide the missing link? *Primary Health Care Research & Development* 2008;**9**(04):310.
13. Mossabir R, Morris R, Kennedy A, et al. A scoping review to understand the effectiveness of linking schemes from healthcare providers to community resources to improve the health and well-being of people with long-term conditions. *Health & social care in the community* 2015;**23**(5):467-84.
14. Kumar GS, Klein R. Effectiveness of case management strategies in reducing emergency department visits in frequent user patient populations: a systematic review. *The Journal of emergency medicine* 2013;**44**(3):717-29.
15. Soril LJ, Leggett LE, Lorenzetti DL, et al. Reducing frequent visits to the emergency department: a systematic review of interventions. *PLoS One* 2015;**10**(4):e0123660.
16. Pawson R, Tilley N. *Realistic Evaluation*. London: SAGE, 1997.
17. White J, Kinsella K, South J. An evaluation of social prescribing health trainers in South and West Bradford. Leeds: Leeds Metropolitan University, 2010.
18. Lee K-H, Davenport L. Can case management interventions reduce the number of emergency department visits by frequent users? *The Health Care Manager* 2006;**25**(2):155-59.
19. Stickley T, Hui A. Social prescribing through arts on prescription in a U.K. city: participants' perspectives (part 1). *Public health* 2012;**126**(7):574-9.
20. Friedli L, Themessl-Huber M, Butchart M. Evaluation of Dundee Equally Well Sources of Support: Social prescribing in Maryfield Evaluation report four. Dundee: Equally Well Dundee, 2012.
21. Garety PA, Craig TKJ, Dunn G, et al. Specialised care for early psychosis: symptoms, social functioning and patient satisfaction. *British Journal of Psychiatry* 2006;**188**(1):37-45.
22. Greaves CJ, Farbus L. Effects of creative and social activity on the health and well-being of socially isolated older people: outcomes from a multi-method observational study. *The Journal of the Royal Society for the Promotion of Health* 2006;**126**(3):134-42.

23. Crawford M, Rutter D, Price K, et al. Learning the lessons: a multi-method evaluation of dedicated community-based services for people with personality disorder: National Co-ordinating Centre for NHS Service Delivery and Organisation R&D (NCCSDO), 2007.
24. Faulkner M. Supporting the psychosocial needs of patients in general practice: the role of a voluntary referral service. *Patient Education and Counseling* 2004;**52**(1):41-46.
25. Grayer J, Cape J, Orpwood L, et al. Facilitating access to voluntary and community services for patients with psychosocial problems: a before-after evaluation. *BMC family practice* 2008;**9**:27.
26. Okin RL, Boccellari A, Azocar F, et al. The effects of clinical case management on hospital service use among ED frequent users. *The American journal of emergency medicine* 2000;**18**(5):603-8.
27. Stickley T, Eades M. Arts on prescription: a qualitative outcomes study. *Public health* 2013;**127**(8):727-34.
28. Innovation Unit. Wigan community link worker service evaluation. London: Innovation Unit, 2016.
29. City and Hackney Clinical Commissioning Group, University of East London. Shine 2014 final report social prescribing: Integrating GP and community assets for health. London: University of East London, 2014.
30. Bragg R, Wood C, Barton J. Ecominds effects on mental wellbeing: An evaluation for mind. Essex: University of Essex, 2013.
31. Newcastle West Clinical Commissioning Group. Social prescribing for mental health: An integrated approach project report. Newcastle: Newcastle West Clinical Commissioning Group, 2014.
32. Jones M, Kimberlee R, Deave T, et al. The role of community centre-based arts, leisure and social activities in promoting adult well-being and healthy lifestyles. *International journal of environmental research and public health* 2013;**10**(5):1948-62.
33. Baker K, Irving A. Co-producing Approaches to the Management of Dementia through Social Prescribing. *Social Policy & Administration* 2016;**50**(3):379-97.
34. Cohen GD, Perlstein S, Chapline J, et al. The impact of professionally conducted cultural programs on the physical health, mental health and social functioning of older adults. *The Gerontologist* 2006;**46**(6):726-34.
35. ERS Research and Consultancy. Newcastle social prescribing project: Final report. Newcastle upon Tyne: ERS Research and Consultancy, 2013.
36. Morton L, Ferguson M, Baty F. Improving wellbeing and self-efficacy by social prescription. *Public health* 2015;**129**(3):286-9.
37. Huxley P. Arts on Prescription: An Evaluation. United Kingdom, 1997.
38. The Care Forum. New routes: End of project report. Bristol, UK: The Care Forum, 2015.
39. Kilroy A, Garner C, Parkinson C, et al. Towards Transformation: Exploring the impact of culture, creativity and the arts on health and wellbeing: A consultation report for the critical friends event. Manchester, UK: Arts for Health, Manchester Metropolitan University, 2007.
40. Grant C, Goodenough T, Harvey I, et al. A randomised control trial and economic evaluation of a referrals facilitator between primary care and the voluntary sector. *British Medical Journal* 2000;**320**(7232):419-23.
41. White M, Salamon E. An interim evaluation of the 'Arts For Well-being' social prescribing scheme in County Durham. Durham: Centre for Medical Humanities, Durham University, 2010.
42. Ramsbottom H, Volpe J, Pantelic V. Social prescribing: A model for partnership working between primary care and the voluntary sector. London: Age UK, n.d.
43. Blakeman T, Blickem C, Kennedy A, et al. Effect of information and telephone-guided access to community support for people with chronic kidney disease: randomised controlled trial. *PLoS One* 2014;**9**(10):e109135.

- 1  
2  
3 44. Liao M-C, Chen L-K, Chou M-Y, et al. Effectiveness of Comprehensive Geriatric Assessment-Based  
4 Intervention to Reduce Frequent Emergency Department Visits: A Report of Four Cases.  
5 International Journal of Gerontology 2012;**6**(2):131-33.  
6  
7 45. Vogelpoel N, Jarrold K. Social prescription and the role of participatory arts programmes for  
8 older people with sensory impairments. Journal of Integrated Care 2014;**22**(2):39-50.  
9  
10 46. Dayson C, Bashir N. The social and economic impact of the Rotherham Social Prescribing Pilot:  
11 Summary evaluation report. Sheffield: Sheffield Hallam University, 2014.  
12  
13 47. Reinius P, Johansson M, Fjellner A, et al. A telephone-based case-management intervention  
14 reduces healthcare utilization for frequent emergency department visitors. European  
15 Journal of Emergency Medicine 2013;**20**(5):327-34.  
16  
17 48. Blickem C, Kennedy A, Jariwala P, et al. Aligning everyday life priorities with people's self-  
18 management support networks: An exploration of the work and implementation of a needs-  
19 led telephone-based support system. BMC Health Services Research 2014;**14**(262):1-12.  
20  
21 49. Goodhart C, Layzell S, Cook A, et al. Family support in general practice. Journal of the Royal  
22 Society of Medicine 1999;**92**(10):525-28.  
23  
24 50. Hudon C, Chouinard MC, Diadiou F, et al. Case Management in Primary Care for Frequent Users  
25 of Health Care Services With Chronic Diseases: A Qualitative Study of Patient and Family  
26 Experience. Annals of family medicine 2015;**13**(6):523-8.  
27  
28 51. Skinner J, Carter L, Haxton C. Case management of patients who frequently present to a Scottish  
29 emergency department. Emergency medicine journal : EMJ 2009;**26**(2):103-5.  
30  
31 52. Tadros AS, Castillo EM, Chan TC, et al. Effects of an emergency medical services-based resource  
32 access program on frequent users of health services. Prehospital emergency care : official  
33 journal of the National Association of EMS Physicians and the National Association of State  
34 EMS Directors 2012;**16**(4):541-7.  
35  
36 53. Maughan DL, Patel A, Parveen T, et al. Primary-care-based social prescribing for mental health:  
37 an analysis of financial and environmental sustainability. Primary health care research &  
38 development 2016;**17**(2):114-21.  
39  
40 54. Gupta K, Coupland L, Fottrell E. A two-year review of an 'open access' multidisciplinary  
41 community psychiatric service for the elderly. International Journal of Geriatric Psychiatry  
42 1996;**11**(9):795-99.  
43  
44 55. Lamont T, Barber N, de Pury J, et al. New approaches to evaluating complex health and care  
45 systems. BMJ 2016;**352** (i154):1-5.  
46  
47 56. Thomson LJ, Camic PM, Chatterjee HJ. Social prescribing: A review of community referral  
48 schemes. London: University College London, 2015.  
49  
50 57. Kinsella S. Social prescribing: A review of the evidence. Wirral: Wirral Council Business & Public  
51 Health Intelligence Team, 2015.  
52  
53 58. Bickerdike L, Booth A, Wilson PM, et al. Social prescribing: less rhetoric and more reality. A  
54 systematic review of the evidence. BMJ open 2017;**7**(4):e013384.  
55  
56  
57  
58  
59  
60

1  
2  
3  
4  
5  
6  
7  
8  
9  
10  
11  
12  
13  
14  
15  
16  
17  
18  
19  
20  
21  
22  
23  
24  
25  
26  
27  
28  
29  
30  
31  
32  
33  
34  
35  
36  
37  
38  
39  
40  
41  
42  
43  
44  
45  
46  
47  
48  
49  
50  
51  
52  
53  
54  
55  
56  
57  
58  
59  
60

Figure 1: PRISMA Flow Diagram

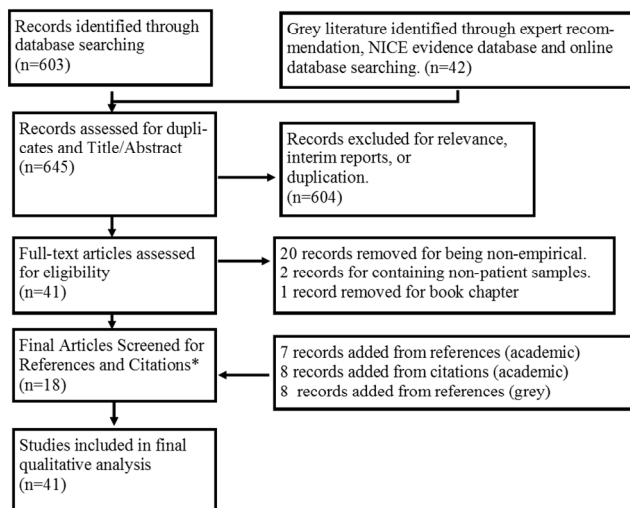

\*Additional articles (e.g. review and non-empirical papers) that did not meet inclusion criteria in previous search stages were also hand-searched for citations and references.

Figure 1



1  
2  
3  
4  
5  
6  
7  
8  
9  
10  
11  
12  
13  
14  
15  
16  
17  
18  
19  
20  
21  
22  
23  
24  
25  
26  
27  
28  
29  
30  
31  
32  
33  
34  
35  
36  
37  
38  
39  
40  
41  
42  
43  
44  
45  
46  
47  
48  
49  
50  
51  
52  
53  
54  
55  
56  
57  
58  
59  
60

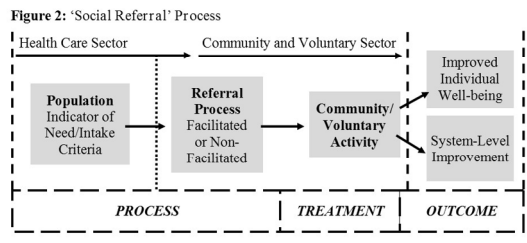

Figure 2

297x209mm (150 x 150 DPI)

View only

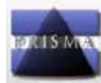

# PRISMA 2009 Checklist

1  
2  
3  
4  
5  
6  
7  
8  
9  
10  
11  
12  
13  
14  
15  
16  
17  
18  
19  
20  
21  
22  
23  
24  
25  
26  
27  
28  
29  
30  
31  
32  
33  
34  
35  
36  
37  
38  
39  
40  
41  
42  
43  
44  
45  
46  
47  
48  
49

| Section/topic                      | #  | Checklist item                                                                                                                                                                                                                                                                                              | Reported on page # |
|------------------------------------|----|-------------------------------------------------------------------------------------------------------------------------------------------------------------------------------------------------------------------------------------------------------------------------------------------------------------|--------------------|
| <b>TITLE</b>                       |    |                                                                                                                                                                                                                                                                                                             |                    |
| Title                              | 1  | Identify the report as a systematic review, meta-analysis, or both.                                                                                                                                                                                                                                         |                    |
| <b>ABSTRACT</b>                    |    |                                                                                                                                                                                                                                                                                                             |                    |
| Structured summary                 | 2  | Provide a structured summary including, as applicable: background; objectives; data sources; study eligibility criteria, participants, and interventions; study appraisal and synthesis methods; results; limitations; conclusions and implications of key findings; systematic review registration number. | 2                  |
| <b>INTRODUCTION</b>                |    |                                                                                                                                                                                                                                                                                                             |                    |
| Rationale                          | 3  | Describe the rationale for the review in the context of what is already known.                                                                                                                                                                                                                              | 4-5                |
| Objectives                         | 4  | Provide an explicit statement of questions being addressed with reference to participants, interventions, comparisons, outcomes, and study design (PICOS).                                                                                                                                                  | 4-5                |
| <b>METHODS</b>                     |    |                                                                                                                                                                                                                                                                                                             |                    |
| Protocol and registration          | 5  | Indicate if a review protocol exists, if and where it can be accessed (e.g., Web address), and, if available, provide registration information including registration number.                                                                                                                               | n/a                |
| Eligibility criteria               | 6  | Specify study characteristics (e.g., PICOS, length of follow-up) and report characteristics (e.g., years considered, language, publication status) used as criteria for eligibility, giving rationale.                                                                                                      | 5-7                |
| Information sources                | 7  | Describe all information sources (e.g., databases with dates of coverage, contact with study authors to identify additional studies) in the search and date last searched.                                                                                                                                  | 5-7                |
| Search                             | 8  | Present full electronic search strategy for at least one database, including any limits used, such that it could be repeated.                                                                                                                                                                               | 5-7                |
| Study selection                    | 9  | State the process for selecting studies (i.e., screening, eligibility, included in systematic review, and, if applicable, included in the meta-analysis).                                                                                                                                                   | 5-7                |
| Data collection process            | 10 | Describe method of data extraction from reports (e.g., piloted forms, independently, in duplicate) and any processes for obtaining and confirming data from investigators.                                                                                                                                  | 5-7                |
| Data items                         | 11 | List and define all variables for which data were sought (e.g., PICOS, funding sources) and any assumptions and simplifications made.                                                                                                                                                                       | 5-7                |
| Risk of bias in individual studies | 12 | Describe methods used for assessing risk of bias of individual studies (including specification of whether this was done at the study or outcome level), and how this information is to be used in any data synthesis.                                                                                      | n/a                |
| Summary measures                   | 13 | State the principal summary measures (e.g., risk ratio, difference in means).                                                                                                                                                                                                                               | n/a                |
| Synthesis of results               | 14 | Describe the methods of handling data and combining results of studies, if done, including measures of consistency (e.g., $I^2$ for each meta-analysis).                                                                                                                                                    | 5-7                |

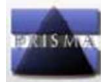

# PRISMA 2009 Checklist

Page 1 of 2

| Section/topic                 | #  | Checklist item                                                                                                                                                                                           | Reported on page # |
|-------------------------------|----|----------------------------------------------------------------------------------------------------------------------------------------------------------------------------------------------------------|--------------------|
| Risk of bias across studies   | 15 | Specify any assessment of risk of bias that may affect the cumulative evidence (e.g., publication bias, selective reporting within studies).                                                             | n/a                |
| Additional analyses           | 16 | Describe methods of additional analyses (e.g., sensitivity or subgroup analyses, meta-regression), if done, indicating which were pre-specified.                                                         | n/a                |
| <b>RESULTS</b>                |    |                                                                                                                                                                                                          |                    |
| Study selection               | 17 | Give numbers of studies screened, assessed for eligibility, and included in the review, with reasons for exclusions at each stage, ideally with a flow diagram.                                          | 7-8                |
| Study characteristics         | 18 | For each study, present characteristics for which data were extracted (e.g., study size, PICOS, follow-up period) and provide the citations.                                                             | 7-12/suppl.        |
| Risk of bias within studies   | 19 | Present data on risk of bias of each study and, if available, any outcome level assessment (see item 12).                                                                                                | n/a                |
| Results of individual studies | 20 | For all outcomes considered (benefits or harms), present, for each study: (a) simple summary data for each intervention group (b) effect estimates and confidence intervals, ideally with a forest plot. | 7-12/suppl.        |
| Synthesis of results          | 21 | Present results of each meta-analysis done, including confidence intervals and measures of consistency.                                                                                                  | n/a                |
| Risk of bias across studies   | 22 | Present results of any assessment of risk of bias across studies (see Item 15).                                                                                                                          | n/a                |
| Additional analysis           | 23 | Give results of additional analyses, if done (e.g., sensitivity or subgroup analyses, meta-regression [see Item 16]).                                                                                    | n/a                |
| <b>DISCUSSION</b>             |    |                                                                                                                                                                                                          |                    |
| Summary of evidence           | 24 | Summarize the main findings including the strength of evidence for each main outcome; consider their relevance to key groups (e.g., healthcare providers, users, and policy makers).                     | 13-16              |
| Limitations                   | 25 | Discuss limitations at study and outcome level (e.g., risk of bias), and at review-level (e.g., incomplete retrieval of identified research, reporting bias).                                            | 16                 |
| Conclusions                   | 26 | Provide a general interpretation of the results in the context of other evidence, and implications for future research.                                                                                  | 13-16              |
| <b>FUNDING</b>                |    |                                                                                                                                                                                                          |                    |
| Funding                       | 27 | Describe sources of funding for the systematic review and other support (e.g., supply of data); role of funders for the systematic review.                                                               | 18                 |

From: Moher D, Liberati A, Tetzlaff J, Altman DG, The PRISMA Group (2009). Preferred Reporting Items for Systematic Reviews and Meta-Analyses: The PRISMA Statement. PLoS Med 6(6): e1000097. doi:10.1371/journal.pmed1000097

For more information, visit: [www.prisma-statement.org](http://www.prisma-statement.org).

For peer review only - <http://bmjopen.bmj.com/site/about/guidelines.xhtml>

## Appendix 1: Social Referral Programme Design

| Reference                      | Programme name                                                             | Peer-reviewed? | Study type   | Study design                                               | Stated aim of social referral programme                                                                                                        | Programme design                             | Referral criteria                                                                      | Study/Programme location | Number of programme participants | Number of study participants      |
|--------------------------------|----------------------------------------------------------------------------|----------------|--------------|------------------------------------------------------------|------------------------------------------------------------------------------------------------------------------------------------------------|----------------------------------------------|----------------------------------------------------------------------------------------|--------------------------|----------------------------------|-----------------------------------|
| BAKER, K. AND A. IRVING (2016) | Not listed.                                                                | Yes            | Qualitative  | Qualitative interview and focus group study.               | To reduce isolation / loneliness and improve wellbeing.                                                                                        | Non-specific social prescribing service      | Individuals with early onset dementia and depression living semi or fully-independent. | NE England, UK           | Not listed.                      | n=30                              |
| BLAKEMAN, T., ET AL. (2014)    | BRinging Information and Guided Help Together (BRIGHT)                     | Yes            | Quantitative | Pragmatic, two-arm, patient level randomised control trial | To support the self-management of long-term health conditions, improving health / wellbeing and at a reduced cost.                             | Telephone-guided access to Community Support | Patients with stage 3 Chronic Kidney Disease                                           | Greater Manchester, UK   | N=436                            | n=436 (n=215 to intervention arm) |
| BLICKEM, C., ET AL. (2014)     | Patient-Led Assessment for Network Support (PLANS) as part of BRIGHT trial | Yes            | Qualitative  | Qualitative interview, focus group, and observation study. | To improve the self-management of long-term health conditions through community support and engagement.                                        | Telephone support service.                   | Patients with stage 3 Chronic Kidney Disease                                           | Greater Manchester, UK   | N=207                            | n=20                              |
| BRAGG, R., ET AL. (2013)       | Ecominds                                                                   | No             | Quantitative | Before-after study.                                        | To improve psychological health and wellbeing (confidence, self-esteem, physical and mental health), social inclusion and connection to nature | Eco-therapy programme.                       | Individuals with mental health problems.                                               | England, UK              | Not listed.                      | n=803                             |

|                                                                                    |                                       |     |               |                                                                                                                                                            |                                                                                                                                                                                        |                                                                       |                                                                                                                                  |                    |                                                            |                                                                                                                                          |
|------------------------------------------------------------------------------------|---------------------------------------|-----|---------------|------------------------------------------------------------------------------------------------------------------------------------------------------------|----------------------------------------------------------------------------------------------------------------------------------------------------------------------------------------|-----------------------------------------------------------------------|----------------------------------------------------------------------------------------------------------------------------------|--------------------|------------------------------------------------------------|------------------------------------------------------------------------------------------------------------------------------------------|
| CITY AND HACKNEY CLINICAL COMMISSIONING GROUP AND UNIVERSITY OF EAST LONDON (2014) | City and Hackney Social Prescribing   | No  | Mixed Methods | 8-month follow-up, prospective cohort- control and interview study                                                                                         | To reduce social isolation, better manage long-term conditions, improve health/well-being, increase take-up of community activities and support individuals to visit GP/hospital less. | GP-referred, facilitated social prescribing programme.                | Non-specific, targeted social isolation but includes a range of social and mental health problems.                               | London, UK         | N=737                                                      | n=15 qualitative, n=486 quantitative (n=184 to intervention arm)                                                                         |
| COHEN, G. D., ET AL. (2006)                                                        | Creativity and Aging Study            | Yes | Quantitative  | Quasi-experimental prospective cohort-comparison study.                                                                                                    | To improve physical and mental health and social engagement.                                                                                                                           | Self-referred weekly cultural activity groups.                        | Ambulatory individuals over 64.                                                                                                  | Washington DC, USA | N=>300                                                     | n=166                                                                                                                                    |
| CRAWFORD, M., ET AL. (2007)                                                        | Community Links Service               | No  | Mixed Methods | Semi-structured interview study, 12-month follow-up, before-after study.                                                                                   | To improve service use, address psychosocial needs and decrease the risk for social exclusion for individuals with personality disorder.                                               | GP or primary care referred facilitated social prescribing programme. | Individuals diagnosed with a personality disorder, or exhibiting interpersonal problems.                                         | London, UK         | N=76 (assumed based on report, but service was anonymised) | n=11 quantitative, n=12 for qualitative                                                                                                  |
| DAYSON, C. AND N. BASHIR (2014)                                                    | Rotherham Social Prescribing Pilot    | No  | Mixed Methods | 6- and 12-month before-after cohort study for administrative data. 3-4-month follow-up cohort study for wellbeing measures. Plus qualitative case studies. | To improve health and social outcomes of individuals with long term conditions and to reduce the use of NHS services to decrease cost.                                                 | GP referred facilitated social prescribing programme.                 | Individuals with long-term health conditions.                                                                                    | Rotherham, UK      | N=1607                                                     | n=280 quantitative (wellbeing), n=108 quantitative (12 month follow-up), n=451 (6 month follow-up), n=unknown qualitative (case studies) |
| ERS RESEARCH AND CONSULTANCY (2013)                                                | Newcastle Social Prescribing Project. | No  | Mixed Methods | Before-after study and interview study. Plus general demographic analysis.                                                                                 | To improve the physical, mental and social wellbeing of individuals managing long-term conditions and to reduce health service use to reduce cost.                                     | GP referred link worker social prescribing programme.                 | Mostly individuals with long term health conditions and mental health problems but also problems with social networks/lifestyle. | Newcastle, UK      | N=124                                                      | n=9 qualitative, n=16 quantitative                                                                                                       |

|                                                                                        |                                          |                                                           |     |               |                                                                                                                                           |                                                                                                                                                                                               |                                                                            |                                                                                                                                                                                                                                                                                                                                              |               |                            |                                                                           |
|----------------------------------------------------------------------------------------|------------------------------------------|-----------------------------------------------------------|-----|---------------|-------------------------------------------------------------------------------------------------------------------------------------------|-----------------------------------------------------------------------------------------------------------------------------------------------------------------------------------------------|----------------------------------------------------------------------------|----------------------------------------------------------------------------------------------------------------------------------------------------------------------------------------------------------------------------------------------------------------------------------------------------------------------------------------------|---------------|----------------------------|---------------------------------------------------------------------------|
| 1<br>2<br>3<br>4<br>5<br>6<br>7<br>8<br>9                                              | FAULKNER, M. (2004)                      | Patient Support Service (PSS)                             | Yes | Qualitative   | Semi-structured interview 1-month post intervention                                                                                       | To improve the psychosocial state of individuals.                                                                                                                                             | GP or Practice Nurse referred voluntary community referral service.        | Patients 18 or over, with psychosocial problems, without other co-occurring concerns like behavioural problems.                                                                                                                                                                                                                              | Doncaster, UK | N=34                       | n=11                                                                      |
| 10<br>11<br>12<br>13<br>14<br>15<br>16<br>17<br>18<br>19                               | FRIEDLI, THEMESL-HUBER & BUTCHART (2012) | Sources of Support from the Dundee Equally Well Test Site | No  | Mixed Methods | Before-after comparison study, interview study, and cross-sectional demographic analysis.                                                 | To improve mental wellbeing uptake of local services, participation in community activities, social support/contact/networks. And to enhance skills/behaviours that improve mental wellbeing. | GP referred, facilitated social prescribing service                        | Open but targeting individuals with poor mental wellbeing related to social circumstances, mild to moderate depression or anxiety, long term mental/physical conditions and frequent attenders.                                                                                                                                              | Dundee, UK    | N=123                      | n=16 for before-after study, n=12 interview study, n=123 cross-sectional, |
| 20<br>21<br>22<br>23<br>24                                                             | GARETY, P.A., ET AL. (2006)              | Lambeth Early Onset Team Care                             | Yes | Quantitative  | Randomised control trial with 18-month follow-up                                                                                          | To help individual retain/recover functional capacity to study or work and/or re-establish supportive social networks.                                                                        |                                                                            | Individuals aged 16-40 for present for a first time with a non-affective psychosis.                                                                                                                                                                                                                                                          | Lambeth, UK   | N=144                      | n=71 to intervention, n=73 control                                        |
| 25<br>26<br>27<br>28<br>29<br>30<br>31<br>32<br>33<br>34<br>35<br>36<br>37<br>38<br>39 | GOODHART, C., ET AL. (1999)              | WellFamily Project                                        | Yes | Mixed Methods | Semi-structured interviews with patients and before-after study (following whether what patients wanted from service was met by referral) | To support individuals experience social difficulties.                                                                                                                                        | GP referred, facilitated family and individual social prescribing service. | Families in need who fall below social services threshold. Specifically individuals who are isolated, depressed, frequent attenders with psychosocial problems, families concerns about child's behaviour, families that have difficulty providing adequate levels of care, and individuals concerned about welfare of other family members. | London, UK    | N=136 patients or families | n=20 interview study, n=136 referrals                                     |

40  
41  
42  
43  
44  
45  
46  
47  
48  
49

|                                     |                                                                             |     |               |                                                                                                                 |                                                                                                            |                                                                                           |                                                                                                         |                  |             |                                                  |
|-------------------------------------|-----------------------------------------------------------------------------|-----|---------------|-----------------------------------------------------------------------------------------------------------------|------------------------------------------------------------------------------------------------------------|-------------------------------------------------------------------------------------------|---------------------------------------------------------------------------------------------------------|------------------|-------------|--------------------------------------------------|
| GRANT, C., ET AL. (2000)            | Almathea Project                                                            | Yes | Quantitative  | Two-arm randomised control trial with one and four month follow-up.                                             | To improve patient quality of life and provide better management of psychosocial problems in primary care. | GP referred, referrals facilitation service between primary care and voluntary sector     | Patients 16 or over who have psychosocial problems                                                      | Avon, UK         | N=161       | n=161 (n=90 to intervention arm)                 |
| GRAYEY, J., ET AL. (2008)           | Graduate Primary Care Mental Health Workers (GPC MHW) Community Link Scheme | Yes | Quantitative  | Three month follow-up before-after study                                                                        | To improve patient psychosocial wellbeing and to reduce primary care service use.                          | Primary care team referred, GPC MHW facilitated community and voluntary referrals service | Patients 18 or over with psychosocial problems.                                                         | London, UK       | N=108       | n=108                                            |
| GREAVES, C. J. AND L. FARBUS (2006) | Upstream Healthy Living Centre                                              | Yes | Mixed Methods | Qualitative semi-structured interview study and focus groups. And 5-6 month and 10-12 month before-after study. | To improve physical and psychosocial health through active social contact.                                 | A self- or community referred mentoring service with referrals to social activities.      | Socially isolated older adults over the age of 50.                                                      | Devon, UK        | N=229       | n=26 qualitative, n=172 quantitative at baseline |
| GUPTA, K., ET AL. (1996)            | Not listed.                                                                 | Yes | Quantitative  | Cross-sectional GP and Patient experience survey and retrospective study.                                       | To reduce hospital care use among elderly people and promote independent living                            | A multidisciplinary, community psychogeriatric service with telephone support service     | Psychiatrically at-risk elderly individuals.                                                            | West Lambeth, UK | N=971       | n=109                                            |
| HUDON, C., ET AL. (2015)            | V1SAGES project                                                             | Yes | Qualitative   | Retrospective descriptive semi-structured interview study                                                       | To optimise health care coordination and reduce health service use.                                        | Nurse-facilitated case management service for frequent primary care users                 | Patients aged 18-80 with at least one chronic health condition and who are frequent primary care users. | Quebec, Canada   | Not listed. | n=25                                             |

|                                                                                                       |                                                                     |                                     |    |               |                                                          |                                                                                                                                                                                                                                                                                                                                                                                                                                  |                                                                                              |                                          |               |                      |                                     |
|-------------------------------------------------------------------------------------------------------|---------------------------------------------------------------------|-------------------------------------|----|---------------|----------------------------------------------------------|----------------------------------------------------------------------------------------------------------------------------------------------------------------------------------------------------------------------------------------------------------------------------------------------------------------------------------------------------------------------------------------------------------------------------------|----------------------------------------------------------------------------------------------|------------------------------------------|---------------|----------------------|-------------------------------------|
| 1<br>2<br>3<br>4<br>5<br>6<br>7<br>8<br>9<br>10<br>11<br>12<br>13<br>14<br>15<br>16<br>17<br>18<br>19 | HUXLEY, P. (1997)                                                   | The Arts on Prescription Project    | No | Mixed Methods | Before-after prospective study.                          | To increase the level of mental well-being of participants using a wide range of creative processes'. Other aims to provide arts opportunities, recommend appropriate arts activities, raise self-esteem/self-confidence, to 'encourage individuals to look after their own health by developing skills in self-assessment and making choices' and to 'encourage participants to take up further arts/leisure activities'. Pg 5. | Primary care referred arts on prescription programme, which assessment by psychiatric nurse. | People with mild to moderate depression. | Stockport, UK | n=83                 | n=33                                |
| 20<br>21<br>22<br>23<br>24                                                                            | INNOVATION UNIT (2016)                                              | Wigan Community Link Worker Service | No | Mixed Methods | Semi-structured interview study and retrospective study. | To improve health and wellbeing and reduce primary / acute care use through connections to community-based support.                                                                                                                                                                                                                                                                                                              | Primary care referred community social prescribing.                                          | Individuals with 'non clinical needs'    | Wigan, UK     | N=784                | n=784 quantitative, n=3 qualitative |
| 25<br>26<br>27<br>28<br>29<br>30<br>31<br>32<br>33<br>34<br>35<br>36<br>37                            | INNOVATION UNIT AND GREATER MANCHESTER PUBLIC HEALTH NETWORK (2016) | Bromley-by-Bow Centre               | No | Mixed Methods | A short case study.                                      | Not stated.                                                                                                                                                                                                                                                                                                                                                                                                                      | Healthy Living Centre with GP referred facilitated social prescribing                        | Not stated.                              | London, UK    | N=700 'in last year' | Not stated.                         |

38  
39  
40  
41  
42  
43  
44  
45  
46  
47  
48  
49



1  
2  
3  
4  
5  
6  
7  
8  
9  
10  
11  
12  
13  
14  
15  
16  
17  
18  
19  
20  
21  
22  
23  
24  
25  
26  
27  
28  
29  
30  
31  
32  
33  
34  
35  
36  
37  
38  
39  
40  
41  
42  
43  
44  
45  
46  
47  
48  
49

|                                    |                                                                 |     |               |                                                                                  |                                                                                                                                                                          |                                                                            |                                                                                                                                                                                                                                               |                  |         |                                                                                                                   |
|------------------------------------|-----------------------------------------------------------------|-----|---------------|----------------------------------------------------------------------------------|--------------------------------------------------------------------------------------------------------------------------------------------------------------------------|----------------------------------------------------------------------------|-----------------------------------------------------------------------------------------------------------------------------------------------------------------------------------------------------------------------------------------------|------------------|---------|-------------------------------------------------------------------------------------------------------------------|
| JONES, M., ET AL. (2013)           | South West Wellbeing (SWWB) Programme                           | Yes | Quantitative  | Follow-up time varying, before-after study                                       | To improve physical and mental health and social wellbeing.                                                                                                              | Community-based arts, leisure, and social activity service.                | “A focus on individuals’ experiencing low level mental ill health, long term health conditions, low levels of physical activity and/or diet related ill health. These criteria were combined with low income and/or social isolation.” p.1950 | SW England, UK   | N=1848  | n=687 at follow-up                                                                                                |
| KILROY, A., ET AL. (2007)          | Invest to Save Arts in Health Evaluation                        | No  | Mixed Methods | Before-after study. Plus interview study.                                        | (Various) To empower/support individuals to choose a healthier lifestyle. And to create a sense of well-being/transform quality of life for communities and individuals. | Multi-referred, including GP referred, arts on prescription programme.     | Varying across six programmes including age (55+) and individuals with moderate/mild depression.                                                                                                                                              | Manchester, UK   | Unknown | Six programmes ranging from n=7 to n=35 for quantitative, unknown qualitative                                     |
| KIMBERLEE, R., ET AL. (2014)       | Wellspring Healthy Living Centre’s Social Prescribing Programme | No  | Quantitative  | 3- and 12-month before-after cohort study. Plus semi-structured interview study. | To improve wellbeing (mental, spiritual and physical) and reduce health service cost.                                                                                    | GP referred facilitated social prescribing programme.                      | Individuals with long term health conditions.                                                                                                                                                                                                 | Bristol, UK      | N=128   | n-70 quantitative (3 month follow-up), n=40 qualitative, n-40 (12 month follow-up 1), n-80 (12 month follow-up 2) |
| LEE, K.-H. AND L. DAVENPORT (2006) | Not listed.                                                     | Yes | Quantitative  | 5-month before-after study.                                                      | To reduce the number of emergency department visits and improve patient health.                                                                                          | Nurse-facilitated case management for emergency department frequent users. | Patients with three or more emergency department visits in one month.                                                                                                                                                                         | Not listed (USA) | N=50    | n=50                                                                                                              |

|                                                                                                                            |                               |                                       |     |               |                                                |                                                                                        |                                                                                   |                                                                                                                                                                                                                                                                                           |                     |             |                                 |
|----------------------------------------------------------------------------------------------------------------------------|-------------------------------|---------------------------------------|-----|---------------|------------------------------------------------|----------------------------------------------------------------------------------------|-----------------------------------------------------------------------------------|-------------------------------------------------------------------------------------------------------------------------------------------------------------------------------------------------------------------------------------------------------------------------------------------|---------------------|-------------|---------------------------------|
| 1<br>2<br>3<br>4<br>5<br>6<br>7<br>8<br>9<br>10<br>11                                                                      | LIAO, M.-C., ET AL. (2012)    | Not listed.                           | Yes | Mixed Methods | Detailed case description.                     | To reduce emergency department use and improve health through targeted care.           | Comprehensive geriatric assessment (CGA)-based multidisciplinary team (MDT) care. | Patients 65 or older who make five emergency department visits over 30 days at any time in one year.                                                                                                                                                                                      | Not listed (Taiwan) | Not listed. | n=4                             |
| 12<br>13<br>14<br>15<br>16<br>17                                                                                           | MAUGHAN, D. L., ET AL. (2016) | The Connect Project/The Eden Timebank | Yes | Quantitative  | Retrospective 18-month follow-up cohort study. | To reduce healthcare service use and the subsequent financial and environmental costs. | GP and healthcare staff referred community social prescribing programme           | Adults with a 'common' mental health conditions, not in care, who had used Connect services for at least 6 months                                                                                                                                                                         | Carlisle, UK        | Not listed. | n=55 (n=26 to intervention arm) |
| 18<br>19<br>20<br>21<br>22<br>23<br>24<br>25<br>26<br>27<br>28                                                             | MORTON, L., ET AL. (2015)     | Not listed.                           | Yes | Quantitative  | Before-after study.                            | To improve mental wellbeing.                                                           | Mental health professional referred cultural prescribing programme.               | Individuals with mild to moderate mental health conditions.                                                                                                                                                                                                                               | Fife, UK            | N=262       | n=136                           |
| 29<br>30<br>31<br>32<br>33<br>34<br>35<br>36<br>37<br>38<br>39<br>40<br>41<br>42<br>43<br>44<br>45<br>46<br>47<br>48<br>49 | NEW ROUTE BATH                | New Routes                            | No  | Mixed Methods | Before-after prospective study                 | To improve wellbeing.                                                                  | GP referred, facilitated social prescribing service                               | Individuals with low/moderate mental health issues, housebound, lack of mobility, physical health problems related to mental health/wellbeing, low income/unemployed, recently redundant, long-term sick, retired, carers, ex-carers, learning disabilities, and other vulnerable adults. | Keynsham, England   | N=312       | N=240                           |

|                                                    |                                       |     |               |                                                                                                    |                                                                                                                                             |                                                                                                        |                                                                                                                                               |                          |             |                                                            |
|----------------------------------------------------|---------------------------------------|-----|---------------|----------------------------------------------------------------------------------------------------|---------------------------------------------------------------------------------------------------------------------------------------------|--------------------------------------------------------------------------------------------------------|-----------------------------------------------------------------------------------------------------------------------------------------------|--------------------------|-------------|------------------------------------------------------------|
| NEWCASTLE WEST CLINICAL COMMISSIONING GROUP (2014) | Social Prescribing for Mental Health  | No  | Mixed Methods | 3- and 9-month follow-up before-after study. Plus four focus groups and two detailed case studies. | To improve general wellbeing and reduce health service use.                                                                                 | Link worker social prescribing programme and a 'light touch' signposting social prescribing programme. | Individuals who have mental health needs alone or in conjunction with a long term condition.                                                  | Newcastle, UK            | N=21        | n=20 quantitative, n=2 case studies, n=unknown qualitative |
| OKIN, R. L., ET AL. (2000)                         | Not listed.                           | Yes | Quantitative  | 12-month follow-up before-after study.                                                             | To reduce the use of acute hospital services and service cost, and reduce the psychosocial problems of frequent emergency department users. | Psychiatric social-worker facilitated case management programme.                                       | Patients who use an emergency department 5 or more times in 12 months, 18 years or older.                                                     | San Francisco, USA       | N=53        | n=53                                                       |
| RAMSBOTTOM, H., ET AL. (N.D.)                      | The Social Prescribing Pilot Project. | No  | Mixed Methods | Detailed case descriptions and a retrospective study.                                              | To support people aged 55 and over with their social, emotional and practical needs.                                                        | GP referred social prescribing service                                                                 | Older persons with mild to moderate depression or social isolation/loneliness.                                                                | Yorkshire and Humber, UK | N=117       | n=4 case studies, n=unknown quantitative                   |
| REINIUS, P., ET AL. (2013)                         | Not listed.                           | Yes | Quantitative  | 1-year follow-up zelen-design randomised control trial.                                            | To improve self-assessed health and reduce health service use among frequent emergency department users.                                    | Telephone-based case management intervention.                                                          | Patients with three or more emergency visits over 6 months, over 18 years of age and without dementia/psychotic diseases or terminal illness. | Stockholm County, Sweden | N=271       | n=211 intervention, n=57 control, n=3 deceased             |
| SKINNER, J., ET AL. (2009)                         | Not listed.                           | Yes | Quantitative  | 6-month before-after study.                                                                        | To reduce emergency department visits among frequent users.                                                                                 | Nurse and emergency department specialist facilitated case management programme.                       | Patients who visited the emergency department 10 or more times in 6 months.                                                                   | Edinburgh, UK            | N=57        | n=57                                                       |
| SOUTH, J., ET AL. (2008)                           | Community Health Advice Team          | Yes | Qualitative   | Semi-structured interview study                                                                    | To broaden health service provision in the community.                                                                                       | GP or self-referred facilitated social prescribing programme.                                          | Not listed.                                                                                                                                   | Bradford, UK             | Not listed. | n=10                                                       |

|                                                                                                                                                                                  |                                           |                                              |     |                  |                                                                              |                                                                |                                                                                                              |                                                                                                                                               |                 |                              |      |
|----------------------------------------------------------------------------------------------------------------------------------------------------------------------------------|-------------------------------------------|----------------------------------------------|-----|------------------|------------------------------------------------------------------------------|----------------------------------------------------------------|--------------------------------------------------------------------------------------------------------------|-----------------------------------------------------------------------------------------------------------------------------------------------|-----------------|------------------------------|------|
| 1<br>2<br>3<br>4<br>5<br>6<br>7<br>8                                                                                                                                             | STICKLEY, T.<br>AND A. HUI<br>(2012)      | Arts on<br>Prescription<br>programme         | Yes | Qualitative      | Semi-structured<br>interview<br>study.                                       | To improve mental<br>health.                                   | Mental health<br>professional<br>referred arts<br>based activity<br>groups.                                  | Not listed.                                                                                                                                   | Not listed (UK) | N=>400                       | n=16 |
| 9<br>10<br>11<br>12<br>13                                                                                                                                                        | STICKLEY, T.<br>AND M. EADES<br>(2013)    | Art on<br>Prescription<br>Programme          | Yes | Qualitative      | Average 24<br>month post-<br>intervention<br>interview<br>study.             | To create positive<br>mental health and<br>wellbeing outcomes. | Mental health<br>professional<br>referred arts<br>based activity<br>groups. (see<br>Stickley & Hui,<br>2012) | Not listed.                                                                                                                                   | Not listed (UK) | (see Stickley<br>& Hui 2012) | n=10 |
| 14<br>15<br>16<br>17<br>18<br>19                                                                                                                                                 | TADROS, A. S.,<br>ET AL. (2012)           | San Diego<br>Resource<br>Access<br>Programme | Yes | Quantitative     | Before-after<br>retrospective<br>study                                       | To reduce emergency<br>medical services and<br>hospital use.   | Emergency<br>services<br>referred, nurse<br>facilitated case<br>management<br>programme.                     | Patients with 10 or more<br>emergency service<br>transports in preceding 12<br>months.                                                        | San Diego USA   | N=51                         | n=51 |
| 20<br>21<br>22<br>23<br>24<br>25<br>26<br>27<br>28<br>29<br>30<br>31<br>32<br>33<br>34<br>35<br>36<br>37<br>38<br>39<br>40<br>41<br>42<br>43<br>44<br>45<br>46<br>47<br>48<br>49 | VOGELPOEL, N.<br>AND K.<br>JARROLD (2014) | Not listed.                                  | Yes | Mixed<br>Methods | Detailed case<br>study,<br>interview<br>study, and<br>before-after<br>study. | To improve health and<br>social wellbeing.                     | GP referred<br>cultural social<br>prescribing<br>programme.                                                  | “[Older] people<br>experiencing social<br>isolation and associated<br>health problems who have<br>single or multi-sensory<br>impairment” p.41 | Rotherham, UK   | N=12                         | n=12 |

1  
2  
3  
4  
5  
6  
7  
8  
9  
10  
11  
12  
13  
14  
15  
16  
17  
18  
19  
20  
21  
22  
23  
24  
25  
26  
27  
28  
29  
30  
31  
32  
33  
34  
35  
36  
37  
38  
39  
40  
41  
42  
43  
44  
45  
46  
47  
48  
49

|                                 |                                                                     |    |               |                                                                                                                                                                                     |                                                                                                                                  |                                                                      |                                                                                                                                                                                                                                                                                                       |                                  |       |                                                                              |
|---------------------------------|---------------------------------------------------------------------|----|---------------|-------------------------------------------------------------------------------------------------------------------------------------------------------------------------------------|----------------------------------------------------------------------------------------------------------------------------------|----------------------------------------------------------------------|-------------------------------------------------------------------------------------------------------------------------------------------------------------------------------------------------------------------------------------------------------------------------------------------------------|----------------------------------|-------|------------------------------------------------------------------------------|
| WHITE, KINSELLA, & SOUTH (2010) | Health Trainer and Social Prescribing Service (based on CHAT pilot) | No | Mixed Methods | Before-after prospective study (single item question) and structured interviews.                                                                                                    | To support patients with social needs (study aim to examine if patients make more appropriate use of GP practice after referral) | GP referred, facilitated social prescribing service                  | Individuals with mild mental health problems, who are socially isolated, with relationship difficulties, facing problems with finance/housing/employment, carer, parent, struggling with long-term condition or disability, coming to terms with bereavement or wishing to adopt healthier lifestyle. | South and West Bradford, England | N=484 | n=12 interview study, n=484 quantitative study                               |
| WHITE, M. AND E. SALAMON (2010) | Arts for Well-being                                                 | No | Mixed Methods | A cross-sectional quantitative and qualitative analysis of feedback forms. Plus qualitative analysis of five focus groups, one participant interview, and two written testimonials. | To improve resilience, confidence, and self-esteem.                                                                              | Community arts for health improvement, social prescribing programme. | Individuals with long term conditions, new parents or carers.                                                                                                                                                                                                                                         | South and West Bradford, England | N=608 | n=22 quantitative, n=42 qualitative (focus groups), n=3 qualitative (other). |

only

Appendix 2: Programme Aims and Measures

| Reference                   | Peer reviewed? | Study Type  | Individual Level |        |             | Core Aim     | Other | No. of aims | Individual & System Aim?                                | Stated Aim of SP Programme                                                                 | Measure 1                                                                                                  | Measure 2 | Measure 3 | Measure 4 | Measure 5 | Measure 6 | Measure 7 | Measure 8 | Measure 9 | Measure 10 | Measure 11 | Measure 12 |  |
|-----------------------------|----------------|-------------|------------------|--------|-------------|--------------|-------|-------------|---------------------------------------------------------|--------------------------------------------------------------------------------------------|------------------------------------------------------------------------------------------------------------|-----------|-----------|-----------|-----------|-----------|-----------|-----------|-----------|------------|------------|------------|--|
|                             |                |             | Mental Health    | Social | Service Use | System Level |       |             |                                                         |                                                                                            |                                                                                                            |           |           |           |           |           |           |           |           |            |            |            |  |
| Baker, K. and Irving (2016) | Yes            | Qualitative | 1                | 1      |             |              | 2     | 0           | To reduce isolation / loneliness and improve wellbeing. | Focus Group with family members who engaged with the service to explore service experience | Semi-structured (informal) interviews with participants to explore service experience and wellbeing impact |           |           |           |           |           |           |           |           |            |            |            |  |

1  
2  
3  
4  
5  
6  
7  
8  
9  
10  
11  
12  
13  
14  
15  
16  
17  
18  
19  
20  
21  
22  
23  
24  
25  
26  
27  
28  
29  
30  
31  
32  
33  
34  
35  
36  
37  
38  
39  
40  
41  
42  
43  
44  
45  
46  
47  
48  
49

|                                          |     |              |   |   |   |   |   |                                                                                                                    |                                                                               |                                    |                                       |                                                                     |                                                  |                                                                                                         |                                      |                     |                                                                                                               |                                                                                          |                                                  |                        |
|------------------------------------------|-----|--------------|---|---|---|---|---|--------------------------------------------------------------------------------------------------------------------|-------------------------------------------------------------------------------|------------------------------------|---------------------------------------|---------------------------------------------------------------------|--------------------------------------------------|---------------------------------------------------------------------------------------------------------|--------------------------------------|---------------------|---------------------------------------------------------------------------------------------------------------|------------------------------------------------------------------------------------------|--------------------------------------------------|------------------------|
| Blake<br>man,<br>T., et<br>al.<br>(2014) | Yes | Quantitative | 1 | 1 | 1 | 3 | 1 | To support the self-management of long-term health conditions, improving health / wellbeing and at a reduced cost. | Anxiety Questionnaire from HADS                                               | Dichotomous blood pressure control | Education Impact Questionnaire (heiQ) | Emotional response item from Brief illness Perception Questionnaire | EuroQoL (generic health related quality of life) | Four Physical and Psychological Wellbeing Health Education Outcome Measures from Medical Outcomes Study | Incremental cost effectiveness Ratio | Levels of illnesses | Medication Knowledge and Medication Motivation subscales from the Modified Morisky Medication Adherence Scale | Social capital service use via frequency of contact with primary and outpatient services | Summary of Diabetes Self-Care Activities Measure | UCL A Lone Lines Scale |
| Blicke<br>m, C.,<br>et al.<br>(2014)     | Yes | Qualitative  | 1 | 1 | 1 | 2 | 1 | To improve the self-management of long-term health conditions through community support and engagement             | Semi-structured interviews with participants using normalising process theory |                                    |                                       |                                                                     |                                                  |                                                                                                         |                                      |                     |                                                                                                               |                                                                                          |                                                  |                        |





1  
2  
3  
4  
5  
6  
7  
8  
9  
10  
11  
12  
13  
14  
15  
16  
17  
18  
19  
20  
21  
22  
23  
24  
25  
26  
27  
28  
29  
30  
31  
32  
33  
34  
35  
36  
37  
38  
39  
40  
41  
42  
43  
44  
45  
46  
47  
48  
49

|                                 |    |               |   |   |   |   |   |                                                                                                                                          |                                                                   |                                         |                                                              |                                              |                                     |                                                                            |                                   |                                                     |                                  |                                                            |
|---------------------------------|----|---------------|---|---|---|---|---|------------------------------------------------------------------------------------------------------------------------------------------|-------------------------------------------------------------------|-----------------------------------------|--------------------------------------------------------------|----------------------------------------------|-------------------------------------|----------------------------------------------------------------------------|-----------------------------------|-----------------------------------------------------|----------------------------------|------------------------------------------------------------|
| Crawford, M., et al. (2007)     | No | Mixed Methods | 1 | 1 | 1 | 3 | 1 | To improve service use, address psychosocial needs and decrease the risk for social exclusion for individuals with personality disorder. | Care Pathway Record                                               | Current use of alcohol or illicit drugs | Focus Groups with service users exploring service experience | Four-item Patient Satisfaction Questionnaire | Mental Health Inventory             | Semi-structured interviews with service users exploring service experience | Service utilisation questionnaire | Single-item question exploring motivation to change | Social Functioning Questionnaire | Standardised Assessment of Personality – Abbreviated Scale |
| Dayson, C. and N. Bashir (2014) | No | Mixed Methods | 1 | 1 | 1 | 4 | 1 | To improve health and social outcomes of individuals with long term conditions and to reduce the use of NHS services to decrease cost.   | Case Study Interviews with beneficiaries to explore social impact | Cost-Benefit Analysis                   | Hospital Episode Statistics (administrative)                 | Social ROI Analysis                          | Unspecified wellbeing outcomes tool |                                                                            |                                   |                                                     |                                  |                                                            |

1  
2  
3  
4  
5  
6  
7  
8  
9  
10  
11  
12  
13  
14  
15  
16  
17  
18  
19  
20  
21  
22  
23  
24  
25  
26  
27  
28  
29  
30  
31  
32  
33  
34  
35  
36  
37  
38  
39  
40  
41  
42  
43  
44  
45  
46  
47  
48  
49

|                                                 |     |                  |   |   |   |   |   |   |   |                                                                                                                                                                                                    |                                                         |                                                                                                              |                                                                                       |                          |
|-------------------------------------------------|-----|------------------|---|---|---|---|---|---|---|----------------------------------------------------------------------------------------------------------------------------------------------------------------------------------------------------|---------------------------------------------------------|--------------------------------------------------------------------------------------------------------------|---------------------------------------------------------------------------------------|--------------------------|
| ERS<br>Research<br>and<br>Consultancy<br>(2013) | No  | Mixed<br>Methods | 1 | 1 | 1 | 1 | 1 | 5 | 1 | To improve<br>the<br>physical,<br>mental and<br>social<br>wellbeing<br>of<br>individuals<br>managing<br>long-term<br>conditions<br>and to<br>reduce<br>health<br>service use<br>to reduce<br>cost. | Trends<br>in<br>Social<br>Prescri-<br>bing<br>Referrals | Semi-<br>structur-<br>ed<br>interviews<br>with<br>patients<br>to<br>explore<br>service<br>experie-<br>nce    | Warwi-<br>ck-<br>Edinbu-<br>rgh<br>Mental<br>Well-<br>being<br>Scale<br>Short<br>Form | Confid-<br>ence<br>Scale |
| Faulkner, M.<br>(2004)                          | Yes | Qualitative      | 1 |   | 1 |   |   | 2 | 0 | To improve<br>the<br>psychosocial<br>state of<br>individuals.                                                                                                                                      |                                                         | Semi-<br>structur-<br>ed<br>interviews<br>with<br>patients<br>to<br>explore<br>service<br>effectiv-<br>eness |                                                                                       |                          |

1  
2  
3  
4  
5  
6  
7  
8  
9  
10  
11  
12  
13  
14  
15  
16  
17  
18  
19  
20  
21  
22  
23  
24  
25  
26  
27  
28  
29  
30  
31  
32  
33  
34  
35  
36  
37  
38  
39  
40  
41  
42  
43  
44  
45  
46  
47  
48  
49

|                                                            |     |                  |   |   |   |   |   |                                                                                                                                                                                                                                                |                                                                         |                                                                                    |                                                                         |                                        |                                                               |                                                  |                                             |                                                    |                                            |                                                            |
|------------------------------------------------------------|-----|------------------|---|---|---|---|---|------------------------------------------------------------------------------------------------------------------------------------------------------------------------------------------------------------------------------------------------|-------------------------------------------------------------------------|------------------------------------------------------------------------------------|-------------------------------------------------------------------------|----------------------------------------|---------------------------------------------------------------|--------------------------------------------------|---------------------------------------------|----------------------------------------------------|--------------------------------------------|------------------------------------------------------------|
| Friedli, Theme<br>ssl-<br>Huber<br>&<br>Butchart<br>(2012) | No  | Mixed<br>Methods | 1 | 1 | 1 | 3 | 1 | To improve<br>mental<br>wellbeing,<br>uptake of<br>local<br>services,<br>participation<br>in<br>community<br>activities,<br>social<br>support/contact/networks. And to<br>enhance<br>skills/behaviours that<br>improve<br>mental<br>wellbeing. | Demographics<br>Analyses                                                | Semi-structured<br>(assumed)<br>interviews to<br>explore<br>patient<br>experience. | Warwick-<br>Edinburgh<br>Mental<br>Wellbeing<br>Scale<br>Short<br>Scale | Work<br>Social<br>Adjustment<br>Scale  | Reason<br>for<br>Referral                                     |                                                  |                                             |                                                    |                                            |                                                            |
| Garety, P.A., et al.<br>(2006)                             | Yes | Quantitative     | 1 | 1 |   | 2 | 0 | To help<br>individuals<br>retain/recover<br>functional<br>capacity to<br>study or<br>work and/or<br>re-establish<br>supportive<br>social<br>networks.                                                                                          | Adverse<br>incidents<br>(administrative)                                | Calgary<br>Depression<br>Rating<br>Scale                                           | Global<br>Assessment<br>of<br>Function                                  | Housing<br>Records<br>(administrative) | Manchester<br>Short<br>Assessment<br>of<br>Quality<br>of Life | Positive<br>and<br>Negative<br>Syndrome<br>Scale | Relationship<br>Records<br>(administrative) | Scale<br>for<br>the<br>Assessment<br>of<br>Insight | Verona<br>Service<br>Satisfaction<br>Scale | Vocational or<br>Educational<br>Status<br>(administrative) |
| Goodhart, C., et al.<br>(1999)                             | Yes | Mixed<br>Methods |   | 1 |   | 1 | 0 | To support<br>individuals<br>experience<br>social<br>difficulties.                                                                                                                                                                             | Referral<br>records<br>(e.g. what<br>activities<br>were<br>referred to) | Semi-structured<br>interviews to<br>explore<br>patient<br>experiences.             |                                                                         |                                        |                                                               |                                                  |                                             |                                                    |                                            |                                                            |

1  
2  
3  
4  
5  
6  
7  
8  
9  
10  
11  
12  
13  
14  
15  
16  
17  
18  
19  
20  
21  
22  
23  
24  
25  
26  
27  
28  
29  
30  
31  
32  
33  
34  
35  
36  
37  
38  
39  
40  
41  
42  
43  
44  
45  
46  
47  
48  
49

|                                     |     |               |   |   |   |  |   |   |                                                                                                            |                                                       |                                                                    |                                     |                                                  |                                                                            |                                                                    |                                       |
|-------------------------------------|-----|---------------|---|---|---|--|---|---|------------------------------------------------------------------------------------------------------------|-------------------------------------------------------|--------------------------------------------------------------------|-------------------------------------|--------------------------------------------------|----------------------------------------------------------------------------|--------------------------------------------------------------------|---------------------------------------|
| Grant, C., et al. (2000)            | Yes | Quantitative  | 1 |   | 1 |  | 2 | 1 | To improve patient quality of life and provide better management of psychosocial problems in primary care. | Cost Analysis                                         | Dartmouth-COOP/WONCA Functional Health Assessment Chart            | Delighted-terrible Faces Scale      | Duke-UNC Functional Social Support Questionnaire | Hospital Anxiety and Depression Scale                                      |                                                                    |                                       |
| Grayer, J., et al. (2008)           | Yes | Quantitative  | 1 | 1 | 1 |  | 3 | 1 | To improve patient psychosocial wellbeing and to reduce primary care service use.                          | Client Satisfaction questionnaire                     | Clinical Outcomes in Routine Evaluation - Outcomes Measure (novel) | Community Link Evaluation (novel)   | General Health Questionnaire (administrative)    | Number of GP visits (including for psychosocial problems) (administrative) | Number of Prescriptions for Psycho-social Reasons (administrative) | Work and Social Adjustment Scale      |
| Greaves, C. J. and L. Farbus (2006) | Yes | Mixed Methods | 1 | 1 | 1 |  | 3 | 0 | To improve physical and psychosocial health through active social contact.                                 | Focus group with patients to explore patient outcomes | Geriatric Depression scale                                         | MOS Social Support Survey (altered) | Participant Demographics                         | Semi-structured interviews with patients to explore patient outcomes       | Short form 12 Scale                                                | Health and Social Care Usage (survey) |

1  
2  
3  
4  
5  
6  
7  
8  
9  
10  
11  
12  
13  
14  
15  
16  
17  
18  
19  
20  
21  
22  
23  
24  
25  
26  
27  
28  
29  
30  
31  
32  
33  
34  
35  
36  
37  
38  
39  
40  
41  
42  
43  
44  
45  
46  
47  
48  
49

|                          |     |               |   |   |  |   |   |                                                                                                                                                                                        |                                                                      |                                                                                  |                                      |                                         |                       |                               |                                     |
|--------------------------|-----|---------------|---|---|--|---|---|----------------------------------------------------------------------------------------------------------------------------------------------------------------------------------------|----------------------------------------------------------------------|----------------------------------------------------------------------------------|--------------------------------------|-----------------------------------------|-----------------------|-------------------------------|-------------------------------------|
| Gupta, K., et al. (1996) | Yes | Quantitative  |   | 1 |  | 1 | 0 | To reduce hospital care use among elderly people and promote independent living                                                                                                        | Hospital Admissions Length (administrative)                          | Hospital Admission Number (administrative)                                       | Quality of Care Questionnaire        | Hospital Bed Occupancy (administrative) |                       |                               |                                     |
| Hudon, C., et al. (2015) | Yes | Qualitative   |   | 1 |  | 1 | 0 | To optimise health care coordination and reduce health service use.                                                                                                                    | Focus groups with families of patients to explore service experience | Semi-structured, in-depth interviews with patients to explore service experience |                                      |                                         |                       |                               |                                     |
| Huxley, P. (1997)        | No  | Mixed Methods | 1 | 1 |  | 2 | 1 | To increase the level of mental well-being of participants using a wide range of creative processes'. Other aims to provide arts opportunities, recommend appropriate arts activities, | Activities, interests and hobbies question                           | Contact with other health professionals in the last 3 months                     | Contact with GP in the last 3 months | General Health Questionnaire -12        | Self-concept question | Social relationships question | Unknown qualitative response method |





1  
2  
3  
4  
5  
6  
7  
8  
9  
10  
11  
12  
13  
14  
15  
16  
17  
18  
19  
20  
21  
22  
23  
24  
25  
26  
27  
28  
29  
30  
31  
32  
33  
34  
35  
36  
37  
38  
39  
40  
41  
42  
43  
44  
45  
46  
47  
48  
49

|                                    |     |               |   |   |                        |   |   |                                                                                        |                                                        |                                                  |                                |                                               |                                             |                              |                       |                                      |
|------------------------------------|-----|---------------|---|---|------------------------|---|---|----------------------------------------------------------------------------------------|--------------------------------------------------------|--------------------------------------------------|--------------------------------|-----------------------------------------------|---------------------------------------------|------------------------------|-----------------------|--------------------------------------|
| Kimble, R., et al. (2014)          | No  | Quantitative  | 1 | 1 | 1                      | 3 | 1 | To improve wellbeing (mental, spiritual and physical) and reduce health service cost.  | Friends Scale for Isolation                            | GAD7 Anxiety Scale                               | GP Visit Rate (administrative) | International Physical Activity Questionnaire | ONS Wellbeing Measures                      | Perceived Economic Wellbeing | PHQ9 Depression Scale | Social Return on Investment Analysis |
| Lee, K.-H. and L. Davenport (2006) | Yes | Quantitative  | 1 | 1 | 1                      | 2 | 1 | To reduce the number of emergency department visits and improve patient health.        | Emergency Department Number of Visits (administrative) |                                                  |                                |                                               |                                             |                              |                       |                                      |
| Liao, M.-C., et al. (2012)         | Yes | Mixed Methods | 1 | 1 | 1                      | 2 | 1 | To reduce emergency department use and improve health through targeted care.           | Emergency department use (administrative)              | Short case description of participant experience |                                |                                               |                                             |                              |                       |                                      |
| Maughan, D. L., et al. (2016)      | Yes | Quantitative  | 1 | 1 | 1 (Environmental Cost) | 2 | 0 | To reduce healthcare service use and the subsequent financial and environmental costs. | Cost analysis                                          | Number of GP Appointments (administrative)       | Prescription (psychotropic)    | Number (administrative)                       | Second ary Referral Number (administrative) |                              |                       |                                      |



1  
2  
3  
4  
5  
6  
7  
8  
9  
10  
11  
12  
13  
14  
15  
16  
17  
18  
19  
20  
21  
22  
23  
24  
25  
26  
27  
28  
29  
30  
31  
32  
33  
34  
35  
36  
37  
38  
39  
40  
41  
42  
43  
44  
45  
46  
47  
48  
49

|                                                    |     |               |   |   |   |   |                                                             |                             |                                                                                                                 |                                           |
|----------------------------------------------------|-----|---------------|---|---|---|---|-------------------------------------------------------------|-----------------------------|-----------------------------------------------------------------------------------------------------------------|-------------------------------------------|
| Morton, L., et al. (2015)                          | Yes | Quantitative  | 1 |   | 1 | 0 | To improve mental wellbeing.                                | General Self-efficacy Scale | Hospital Anxiety and Depression Scale                                                                           | Warwick-Edinburgh Mental Well-being Scale |
| Newcastle West Clinical Commissioning Group (2014) | No  | Mixed Methods | 1 | 1 | 2 | 1 | To improve general wellbeing and reduce health service use. | Cost Analyses               | Focus Groups with potential or previous patients to explore perceptions and expectations of social prescription |                                           |

1  
2  
3  
4  
5  
6  
7  
8  
9  
10  
11  
12  
13  
14  
15  
16  
17  
18  
19  
20  
21  
22  
23  
24  
25  
26  
27  
28  
29  
30  
31  
32  
33  
34  
35  
36  
37  
38  
39  
40  
41  
42  
43  
44  
45  
46  
47  
48  
49

|                               |     |               |   |   |   |   |   |   |                                                                                                                                             |                                                  |               |                                           |                                                        |
|-------------------------------|-----|---------------|---|---|---|---|---|---|---------------------------------------------------------------------------------------------------------------------------------------------|--------------------------------------------------|---------------|-------------------------------------------|--------------------------------------------------------|
| Okin, R. L., et al. (2000)    | Yes | Quantitative  | 1 | 1 | 1 | 1 | 4 | 1 | To reduce the use of acute hospital services and service cost, and reduce the psychosocial problems of frequent emergency department users. | Case Manager reported drug or alcohol problems   | Cost analysis | Homelessness Status                       | Number of Emergency Department Visits (administrative) |
| Ramsbottom, H., et al. (n.d.) | No  | Mixed Methods | 1 | 1 | 1 | 1 | 2 | 0 | To support people aged 55 and over with their social, emotional and practical needs.                                                        | Short case description of participant experience |               | Warwick-Edinburgh Mental Well-being Scale |                                                        |

1  
2  
3  
4  
5  
6  
7  
8  
9  
10  
11  
12  
13  
14  
15  
16  
17  
18  
19  
20  
21  
22  
23  
24  
25  
26  
27  
28  
29  
30  
31  
32  
33  
34  
35  
36  
37  
38  
39  
40  
41  
42  
43  
44  
45  
46  
47  
48  
49

|                            |     |              |   |   |   |   |                                                                                                          |                                                            |                                                           |                                                |                                                                                                   |                                  |                                               |
|----------------------------|-----|--------------|---|---|---|---|----------------------------------------------------------------------------------------------------------|------------------------------------------------------------|-----------------------------------------------------------|------------------------------------------------|---------------------------------------------------------------------------------------------------|----------------------------------|-----------------------------------------------|
| Reinius, P., et al. (2013) | Yes | Quantitative | 1 | 1 | 2 | 1 | To improve self-assessed health and reduce health service use among frequent emergency department users. | Length of Stay in Hospital (administrative)                | Number of doctors' appointments (administrative)          | Number of hospitalisations (administrative)    | Quantitative analysis of structured interview with patients to assess baseline and medical status | Short-Form Health Survey (SF-36) | Total emergency health costs (administrative) |
| Skinner, J., et al. (2009) | Yes | Quantitative |   | 1 | 1 | 0 | To reduce emergency department visits among frequent users.                                              | Number of Emergency Department Admissions (administrative) | Unspecified case records (referral type) (administrative) | Unspecified diagnostic detail (administrative) |                                                                                                   |                                  |                                               |

1  
2  
3  
4  
5  
6  
7  
8  
9  
10  
11  
12  
13  
14  
15  
16  
17  
18  
19  
20  
21  
22  
23  
24  
25  
26  
27  
28  
29  
30  
31  
32  
33  
34  
35  
36  
37  
38  
39  
40  
41  
42  
43  
44  
45  
46  
47  
48  
49

|                                   |     |             |   |   |  |   |   |                                                          |                                                                                    |
|-----------------------------------|-----|-------------|---|---|--|---|---|----------------------------------------------------------|------------------------------------------------------------------------------------|
| South, J., et al. (2008)          | Yes | Qualitative |   | 1 |  | 1 | 0 | To broaden health service provision in the community.    | Short case description of participant experience                                   |
| Stickle y, T. and A. Hui (2012)   | Yes | Qualitative | 1 |   |  | 1 | 0 | To improve mental health.                                | Semi-structured, in-depth interviews with patients using Narrative Inquiry Process |
| Stickle y, T. and M. Eades (2013) | Yes | Qualitative | 1 | 1 |  | 2 | 0 | To create positive mental health and wellbeing outcomes. | Semi-structured Interview with participants to explore participant experience      |

1  
2  
3  
4  
5  
6  
7  
8  
9  
10  
11  
12  
13  
14  
15  
16  
17  
18  
19  
20  
21  
22  
23  
24  
25  
26  
27  
28  
29  
30  
31  
32  
33  
34  
35  
36  
37  
38  
39  
40  
41  
42  
43  
44  
45  
46  
47  
48  
49

|                                     |     |               |   |   |  |   |   |                                                        |                                                                                     |                                                          |                                                                         |                                                              |                                                            |                     |                                          |                         |                   |                              |
|-------------------------------------|-----|---------------|---|---|--|---|---|--------------------------------------------------------|-------------------------------------------------------------------------------------|----------------------------------------------------------|-------------------------------------------------------------------------|--------------------------------------------------------------|------------------------------------------------------------|---------------------|------------------------------------------|-------------------------|-------------------|------------------------------|
| Tadros, A. S., et al. (2012)        | Yes | Quantitative  |   | 1 |  | 1 | 0 | To reduce emergency medical services and hospital use. | EMS Dispatch Response and Transport Codes                                           | EMS Presence of Comorbidities (administrative)           | Most common health complaint for enrolled participants (administrative) | Resource Access Programme Recorded Activity (administrative) | Time and Cost of Health Care Resource Use (administrative) |                     |                                          |                         |                   |                              |
| The Care Forum (2015)               | No  | Mixed Methods | 1 |   |  | 1 | 0 | To improve wellbeing.                                  | Demographics Analysis                                                               | Detailed Case Studies                                    | Five Ways to Wellbeing                                                  | Make Yourself Medical Outcome Profile                        | Number of Activities Undertaken                            | Reason for referral | Warwick-Edinburgh Mental Wellbeing Scale | Wellbeing Outcomes Star | Referral Activity | Total number of GP referrals |
| Vogelpoel, N. and K. Jarrold (2014) | Yes | Mixed Methods | 1 | 1 |  | 2 | 0 | To improve health and social wellbeing.                | Detailed case studies to explore participant experience (Dynamic Observation scale) | Warwick-Edinburgh Mental Wellbeing Scale (14 and 7 item) |                                                                         |                                                              |                                                            |                     |                                          |                         |                   |                              |

1  
2  
3  
4  
5  
6  
7  
8  
9  
10  
11  
12  
13  
14  
15  
16  
17  
18  
19  
20  
21  
22  
23  
24  
25  
26  
27  
28  
29  
30  
31  
32  
33  
34  
35  
36  
37  
38  
39  
40  
41  
42  
43  
44  
45  
46  
47  
48  
49

|                                 |    |               |   |   |   |   |                                                                                                                                                                         |                                                  |                                                                    |                                                                                                                                                                               |
|---------------------------------|----|---------------|---|---|---|---|-------------------------------------------------------------------------------------------------------------------------------------------------------------------------|--------------------------------------------------|--------------------------------------------------------------------|-------------------------------------------------------------------------------------------------------------------------------------------------------------------------------|
| White, Kinsella, & South (2010) | No | Mixed Methods | 1 | 1 | 2 | 1 | To support patients with social needs (Study Aim to examine if patients make more appropriate use of GP practice after referral, unclear if this is also programme aim) | Detailed Case Studies                            | Single-item question whether patients made progress on their goals | Structured telephone interview about patient views on service                                                                                                                 |
| White, M. and E. Salamon (2010) | No | Mixed Methods | 1 | 1 | 2 | 0 | To improve resilience, confidence, and self-esteem.                                                                                                                     | Content analysis of participant evaluation forms | Review of participant demographic characteristics                  | Semi-structured participant focus groups to explore participant experiences. Semi-structured telephone interviews to explore participant experience. Two written testimonials |
| Total Number of Articles by Aim |    |               | 2 | 1 | 2 | 3 | 6                                                                                                                                                                       | 4                                                |                                                                    | 19                                                                                                                                                                            |

# BMJ Open

## Preparing the prescription: A review of the aim and measurement of social referral programmes

|                                 |                                                                                                                                                                                                                                                                                                                    |
|---------------------------------|--------------------------------------------------------------------------------------------------------------------------------------------------------------------------------------------------------------------------------------------------------------------------------------------------------------------|
| Journal:                        | <i>BMJ Open</i>                                                                                                                                                                                                                                                                                                    |
| Manuscript ID                   | bmjopen-2017-017734.R1                                                                                                                                                                                                                                                                                             |
| Article Type:                   | Research                                                                                                                                                                                                                                                                                                           |
| Date Submitted by the Author:   | 15-Jul-2017                                                                                                                                                                                                                                                                                                        |
| Complete List of Authors:       | Rempel, Emily; University of Bath, Department of Psychology<br>Wilson, Emma; University of Bath, Department of Psychology<br>Durrant, Hannah; University of Bath, Institute for Policy Research<br>Barnett, Julie; University of Bath, Department of Psychology; University of Bath, Institute for Policy Research |
| <b>Primary Subject Heading</b>: | Health services research                                                                                                                                                                                                                                                                                           |
| Secondary Subject Heading:      | Evidence based practice, General practice / Family practice, Health policy                                                                                                                                                                                                                                         |
| Keywords:                       | Social Prescribing, Social Referral, Literature Review, SOCIAL MEDICINE, Health Services Research                                                                                                                                                                                                                  |
|                                 |                                                                                                                                                                                                                                                                                                                    |

SCHOLARONE™  
Manuscripts

1  
2  
3  
4  
5  
6  
7  
8  
9  
10  
11  
12  
13  
14  
15  
16  
17  
18  
19  
20  
21  
22  
23  
24  
25  
26  
27  
28  
29  
30  
31  
32  
33  
34  
35  
36  
37  
38  
39  
40  
41  
42  
43  
44  
45  
46  
47  
48  
49  
50  
51  
52  
53  
54  
55  
56  
57  
58  
59  
60

**Title:**

# **Preparing the prescription: A review of the aim and measurement of social referral programmes**

**Corresponding Author:**

**Emily S. Rempel<sup>1</sup>**

Department of Psychology, University of Bath  
Claverton Down, Bath, United Kingdom  
BA2 7AY

Email: [E.S.Rempel@bath.ac.uk](mailto:E.S.Rempel@bath.ac.uk)

Phone: 01225 384573

**Co-Authors:**

**Emma N. Wilson<sup>1</sup>**

**Hannah Durrant<sup>2</sup>**

**Julie Barnett<sup>1,2</sup>**

<sup>1</sup> Department of Psychology, University of Bath  
Bath, United Kingdom, BA2 7AY

<sup>2</sup> Institute for Policy Research, University of Bath  
Bath, United Kingdom, BA2 7AY

**Word count:** 3825 words



## ABSTRACT

**Objective:** Our aim was to review, and qualitatively evaluate, the aims and measures of social referral programmes. Our first objective is to identify the aims of social referral initiatives. Our second objective is to identify the measures used to evaluate whether the aims of social referral were met.

**Design:** Literature review

**Background:** Social referral programmes, also called social prescribing and emergency case referral, link primary and secondary health care with community services, often under the guise of decreasing health system costs.

**Method:** Following the PRISMA guidelines we undertook a literature review to address that aim. We searched in five academic online databases and in one online non-academic search engine, including both academic and grey literature, for articles referring to 'social prescribing' or 'community referral'.

**Results:** We identified 41 relevant articles and reports. After extracting the aims, measures and type of study, we found that most social referral programmes aimed to address a wide variety of system and individual health problems. This included cost savings, resource reallocation and improved mental, physical and social wellbeing. Across the 41 studies and reports, there were 154 different kinds of measures or methods of evaluation identified. Of these, the most commonly used individual measure was the Warwick-Edinburgh Mental Wellbeing Scale, used in nine studies and reports.

**Conclusions:** These inconsistencies in aims and measures used, pose serious problems when social prescribing and other referral programmes are often advertised as a solution to health services budgeting constraints, as well as a range of chronic mental and physical health conditions. We recommend researchers and local community organisers alike critically evaluate for whom, where and why their social referral programmes 'work'.

## ARTICLE SUMMARY

### Strengths and limitations of this study

- A strength of this study was the inclusion of both grey and academic literature to ensure a broad representation of social referral programmes.
- A strength of this study is in the review of aims and measures of social referral programmes, rather than outcomes.
- A limitation of this study was, that there is no guarantee of an entirely comprehensive inclusion of all relevant articles, for example we only accessed articles and reports available online or through the British Library.
- A limitation of this study was the use of the search term 'social prescribing' as this is a generalised UK region-specific term, however this is the term used colloquially to describe social referral programmes.

## INTRODUCTION

“The tonic effect of fun and play has long been recognized as an antidote to the stresses, worries, labors, and responsibilities of our workaday life... we must diagnose and prepare the prescription.”<sup>1</sup> In 1958, Walt Disney wrote this commentary on film and American life for the 75<sup>th</sup> anniversary of the Journal of the American Medical Association. Although few would argue Disney was a great early adopter of the social determinants of health model, this demonstrates a timely understanding of the impact of social activities on well-being. Academic research demonstrates that social well-being is closely tied to physical health, a well-known example being the impact of socioeconomic positioning on mortality as demonstrated in the Whitehall Studies, as well as other more recent work by Michael Marmot<sup>2,3</sup>. Though this common understanding has not fully translated into clinical practice and public health. Particularly in the context of publicly funded medical systems like the United Kingdom’s National Health Service (NHS), resource limitations and unclear evidence on the causal mechanisms between social activities and improved health make it challenging to incorporate social well-being in treatment models<sup>4</sup>.

Over the past decade, one proposed method of addressing this linking up of health and care services is referral out of primary care health systems and in to the community<sup>5,6</sup>. This ‘emerging model of care’ was alluded to in the NHS 5 Year Forward View<sup>7</sup> in the context of health care needing to move to a partnership rather than discrete episodes of treatment. More substantially, social prescribing was recommended as a key resource for primary care, noting that “non-medical interventions such as social prescribing can contribute to primary care teams meeting the physical, psychological and social care needs of an individual in the round”<sup>8</sup> (pg.7). Sometimes with alternative descriptors such as ‘community referral’, ‘community links’, and ‘arts on prescription’, these programmes link health care to opportunities and events provided by third sector organisations. A rapid evidence review by

1  
2  
3 the University of York defined ‘[social] prescribing [as] a way of linking up patients in  
4  
5 primary care with sources of support in the community’, however the authors highlight that  
6  
7 there is no agreed definition<sup>9</sup>. Kimberlee<sup>10</sup> suggests that social prescribing consists of a range  
8  
9 of different services, from more traditional smoking cessation programmes, and describes  
10  
11 social prescribing as “a route to reducing social exclusion, both for disadvantaged, isolated  
12  
13 and vulnerable populations in general, and for people with enduring mental health problems.”  
14  
15 (pg 105).  
16  
17  
18

19 Although social prescribing is a commonly used term, we use ‘social referral’ to be as  
20  
21 inclusive as possible in describing links between health care and third sector organisations. In  
22  
23 cases where a study specifically uses terms like ‘arts on prescription’ or ‘social prescribing’  
24  
25 we refer to it as such. We also do not specify primary care as the only source of social  
26  
27 referral, we include referrals by other health care workers.  
28  
29  
30

31 Evidence for the effectiveness of social referral services has been characterised as  
32  
33 inconclusive<sup>9</sup>. Although there is significant, if piecemeal, investment in social referral  
34  
35 programmes and many advocates of their value<sup>7 10</sup> attempts to summarise the current  
36  
37 evidence, and thus address these criticisms, have similarly been inconclusive in evidencing  
38  
39 the health, social, or service-related benefits of social referral<sup>11-15</sup>. Mossabir, et al.<sup>13</sup>  
40  
41 conducted a scoping review of seven studies on social prescribing and found that although  
42  
43 potentially beneficial for psychosocial health, there had been too few empirical studies to  
44  
45 draw clear conclusions. The University of York Centre for Reviews and Dissemination<sup>9</sup> goes  
46  
47 as far as to argue ‘there is little in the way of supporting evidence of effect to inform the  
48  
49 commissioning of a social prescribing programme’(pg. 4).  
50  
51  
52

53  
54 The first step in evaluating any programme is determining what it aims ‘to do’ and  
55  
56 deciding on the measures that will be used to ascertain effectiveness. There has thus far been  
57  
58  
59  
60

1  
2  
3 little reflection on the intended aims of social referral and the measures used to judge whether  
4  
5 the aims have been met. Accordingly, our purpose is to summarise the aims and measures of  
6  
7 social referral through a review of the literature. Our first objective is to identify the aims of  
8  
9 social referral initiatives. Our second objective is to identify the measures used to evaluate  
10  
11 whether the aims of social referral were met. This creates a foundation to inform further  
12  
13 programme development and evaluation and for theorising the various mechanisms that may,  
14  
15 in specified contexts, be responsible for changes in particular outcomes. We can thus better  
16  
17 understand what is meant by ‘social prescription’ with a view to informing evaluations to  
18  
19 consider the contexts in which social prescribing works, for whom and through which  
20  
21 mechanisms<sup>16</sup>.  
22  
23  
24  
25

## 26 **LITERATURE SEARCH METHODOLOGY**

27  
28 As part of the ‘Collaborating to Deliver Social Prescribing in Bath and North East  
29  
30 Somerset’ project we conducted a review of empirical and grey literature related to ‘social  
31  
32 prescribing’. We identified PubMed suggested terms associated with social prescribing, as  
33  
34 this is the most commonly used term to identify these kinds of community linking  
35  
36 programmes. The final terms were ‘social prescribing’, ‘social prescribing services’, ‘social  
37  
38 prescription’, ‘social prescriptions’, ‘community referrals’, ‘community referred’,  
39  
40 ‘community referred patients’, ‘community refers’ OR ‘community referring physicians’. We  
41  
42 used exactly these terms to search each of the following databases: SCOPUS, Web of  
43  
44 Science, PubMed, NICE Evidence Guidelines database and PsycNET for academic peer-  
45  
46 reviewed articles. See Supplementary File 1 for a full example search strategy. The term  
47  
48 ‘social referral’ was not included as we defined this term post-hoc, to subsume programmes  
49  
50 that did not label themselves as ‘social prescribing’ as well as those that did. Finally, we  
51  
52 examined the first five pages of results identified by internet search engine Google to identify  
53  
54 grey literature reports related to ‘social prescribing’. After the online database search,  
55  
56  
57  
58  
59  
60

1  
2  
3 academic and non-academic literature reference lists were hand-searched. Only the academic  
4  
5 literature's citations were searched as several of the non-academic reports were not held on  
6  
7 an academic database therefore citation searches could not be conducted. The initial search,  
8  
9 including citations and reference searching, took place in February 2016 and an updated  
10  
11 search was conducted in November 2016 to include recent articles and reports. There were no  
12  
13 date restrictions applied in either of these searches.  
14

15  
16  
17 Identified articles were deemed relevant for inclusion if they reported the assessment  
18  
19 of a referral programme of patients from a health context to a social context. A health context  
20  
21 was considered any form of health or mental care, for example emergency departments,  
22  
23 primary care, and mental health professionals. A social context was considered any form of  
24  
25 community programme including cultural programmes, arts classes, or community groups.  
26  
27 This excluded programmes evaluating a single programme, e.g. a diabetes health  
28  
29 management courses. We excluded these 'single intervention' studies as by definition social  
30  
31 referral programmes are premised on referring an individual to a range of interventions. After  
32  
33 searching using this broad criteria, additional inclusion criteria were added due to the  
34  
35 unexpected range of study methodologies, including many interview studies focused on  
36  
37 clinical or provider perspectives. These criteria included the use of empirical methodology  
38  
39 (qualitative, mixed methods, or quantitative), assessment of a patient sample and the  
40  
41 production of a final article or report. This therefore excluded empirical articles that were  
42  
43 evaluating the service provider's views of a social referral programme. Reports or articles  
44  
45 that were not in their final version (e.g. commissioner or funding interim reports) were  
46  
47 excluded as were conference reports and book chapters. No language or region restrictions  
48  
49 were applied. After identification of relevant articles and reports, we extracted the study type,  
50  
51 stated aim(s), and measures of each social referral programme. We categorised each study's  
52  
53 aim(s) as mental, health, social, service use, service cost, and/or other and also extracted  
54  
55  
56  
57  
58  
59  
60

1  
2  
3 number of aims and whether a study aimed to address both individual and system-level aims.  
4  
5 We did not assess study quality as we were not concerned with the results of social referral  
6  
7 only the stated aims and measures. We also extracted the social referral programme name,  
8  
9 study design, referral criteria, programme location, programme type, number of programme  
10  
11 participants, and number of study participants.  
12  
13

14  
15 E. Rempel screened all initial articles for title and abstract relevancy, and E. Wilson  
16  
17 then read these articles, identified by E. Rempel, for verification that they met inclusion  
18  
19 criteria. The first coder, E. Rempel, developed the coding framework and the second coder,  
20  
21 E. Wilson, separately coded all articles to this framework. Any differences between the  
22  
23 coding of aims or measures, or the inclusion of articles, were subsequently discussed and  
24  
25 agreed upon. Due to the qualitative nature of the review, we did not calculate percentage  
26  
27 agreement.  
28  
29

## 30 31 **RESULTS**

32  
33  
34 The initial database search resulted in 645 articles or reports. After duplicate removal,  
35  
36 title and abstracts were reviewed according to inclusion and exclusion criteria, 41 articles  
37  
38 were identified. On assessment of these full-text articles, 20 were removed for being non-  
39  
40 empirical (e.g. discussion or review articles that did not evaluate a specific social referral  
41  
42 programme but rather provided a general discussion on social prescribing), two were  
43  
44 removed for containing non-patient samples and one was removed as it was a book chapter.  
45  
46 After a forwards and backwards citation search, a further 23 articles were identified as  
47  
48 relevant. At the initial February 2016 search, six review articles or articles with non-patient  
49  
50 samples were also hand-searched for references and citations. Three non-academic articles  
51  
52 referenced in grey literature reports that may have been relevant could not be found as copies  
53  
54 of these reports were not held online, were not available through inter-library loans and were  
55  
56  
57  
58  
59  
60

1  
2  
3 not held at the British Library. Furthermore after contacting the citing author and place of  
4  
5 publication, these articles could still not be found. In total, 41 texts were analysed. See Figure  
6  
7 1 for a PRISMA diagram of the search strategy and results.  
8  
9

10 Of the 41 empirical studies, seven were qualitative, 17 were quantitative and 18  
11  
12 employed mixed methodologies. Figure 2 outlines the process of 'social referral' programmes  
13  
14 described in these studies. The broad nature of the search, led to a broad range of  
15  
16 programmes but all followed the basic outline seen in Figure 2. There was considerable  
17  
18 variation in indicators of need, referral process and types of activities undertaken. For  
19  
20 example, emergency case management as described by Lee and Davenport<sup>17</sup> specifies the  
21  
22 population as those who have three or more emergency department visits per month, as well  
23  
24 as a list of specific health concerns. Their referral process is nurse-led case management,  
25  
26 where they refer to community services as well as other health services. The activities varied  
27  
28 including both community-based as well as more traditional health referrals. In contrast,  
29  
30 Stickley and Hui<sup>18</sup> describe a prescriptive arts programme. They do not specify a population,  
31  
32 only the referral mechanism. The referral was from a primary or secondary mental health  
33  
34 worker. The activity was a ten-week arts programme and the anticipated outcome was  
35  
36 personal health improvement. Appendix 1 outlines the various types of programmes and  
37  
38 study designs. Of the 41 studies, there were 38 unique social referral projects. There were two  
39  
40 repeated programmes (Arts on Prescription and the BRIGHT trial), however the four studies  
41  
42 were all individual evaluations of these services. As well the Health Trainer and Social  
43  
44 Prescribing Service<sup>19</sup> was based on a previous pilot of the CHAT programme<sup>12</sup>. The majority  
45  
46 of these texts described either a social prescription programme or an emergency department  
47  
48 case management programme. All of the social prescribing programmes were set in the  
49  
50 United Kingdom. The emergency department case management programmes were located in  
51  
52 the United States, United Kingdom, Canada and Taiwan. All studies included only adult  
53  
54  
55  
56  
57  
58  
59  
60



populations with study size ranging from four to 784. Patient samples varied greatly, from kidney patients to elderly adults. Programme size also greatly varied from 12 to 1848 referrals. See Appendices 1 and 2 for more details.

**Table 1:** Summary of Aims of Social Referral Programmes\* (n=41)

| Aim Level                  | Core Aim                                                                           | Stated Aim                                                                            | Number of References |
|----------------------------|------------------------------------------------------------------------------------|---------------------------------------------------------------------------------------|----------------------|
| Individual Level Aim       | Improved Mental Well-being                                                         | To enhance skills/behaviours that improve mental wellbeing. <sup>20</sup>             | 25                   |
|                            |                                                                                    | To help individual retain/recover functional capacity to study or work. <sup>21</sup> |                      |
|                            |                                                                                    | To improve/address psychosocial health <sup>22-26</sup>                               |                      |
|                            |                                                                                    | To improve mental health and well-being. <sup>5 18 20 27-39</sup>                     |                      |
|                            |                                                                                    | To improve patient quality of life <sup>39 40</sup>                                   |                      |
|                            | Improved Physical Well-being                                                       | To improve resilience, confidence, and self-esteem. <sup>37 41</sup>                  |                      |
|                            |                                                                                    | To improve spiritual well-being <sup>5</sup>                                          |                      |
|                            |                                                                                    | To support emotional needs. <sup>42</sup>                                             |                      |
|                            |                                                                                    | To empower and support individuals to choose a healthier lifestyle. <sup>39</sup>     |                      |
|                            |                                                                                    | To improve physical health and well-being. <sup>5 17 22 28-30 32 34 35 43-46</sup>    |                      |
| Improved Social Well-being | To improve self-assessed health status. <sup>47</sup>                              | 16                                                                                    |                      |
|                            | To support the self-management of long-term health conditions. <sup>29 43 48</sup> |                                                                                       |                      |
|                            | To increase connection to community-based support. <sup>20 28</sup>                |                                                                                       |                      |
|                            | To improve/address psychosocial health. <sup>22-26</sup>                           |                                                                                       |                      |
|                            | To improve resilience, confidence, and self-esteem. <sup>41</sup>                  |                                                                                       |                      |
| Improved Social Well-being | To improve social inclusion/engagement. <sup>21 23 29 30 33 34</sup>               | 21                                                                                    |                      |
|                            | To improve social well-being <sup>32 35 45</sup>                                   |                                                                                       |                      |
|                            | To support social needs/outcomes. <sup>19 27 42 46 49</sup>                        |                                                                                       |                      |
|                            |                                                                                    |                                                                                       |                      |



|                     |                                        |                                                                                                                                       |    |
|---------------------|----------------------------------------|---------------------------------------------------------------------------------------------------------------------------------------|----|
|                     | Other                                  | To address practical needs e.g. employment. <sup>42</sup><br>To improve connection to nature. <sup>30</sup>                           | 2  |
| System<br>Level Aim | Optimised<br>Health<br>Service Use     | To broaden health service provision in the community <sup>12</sup>                                                                    |    |
|                     |                                        | To improve service use. <sup>23</sup>                                                                                                 |    |
|                     |                                        | To increase take-up of community activities <sup>20 29 37</sup>                                                                       |    |
|                     |                                        | To optimise health care coordination <sup>50</sup>                                                                                    |    |
|                     |                                        | To provide appropriate arts course recommendations. <sup>37</sup>                                                                     |    |
|                     |                                        | To provide better management of psychosocial problems in primary care <sup>40</sup>                                                   | 23 |
|                     |                                        | To reduce emergency department use/acute hospital care. <sup>17 26 28 44 51 52</sup>                                                  |    |
|                     |                                        | To reduce health service use <sup>31 35 46 47 50 53</sup>                                                                             |    |
|                     |                                        | To reduce hospital care use. <sup>29 52 54</sup>                                                                                      |    |
|                     |                                        | To reduce primary care service use. <sup>18 25 28 29</sup>                                                                            |    |
|                     |                                        | To support the self-management of long-term physical or mental health conditions <sup>37 43 48</sup>                                  |    |
|                     | Decreased<br>Health<br>Service<br>Cost | To reduce cost associated with long-term health conditions. <sup>43</sup><br>To reduce health services costs <sup>5 26 35 46 53</sup> | 6  |
|                     | Other                                  | To reduce environmental cost (carbon footprint) <sup>53</sup>                                                                         | 1  |

\*Aims of social referral programmes, not study aims.

Table 1 outlines the aims of the programmes described in the empirical studies. The stated aims were those listed in the individual studies, while the core aims were derived by grouping together similar aims across programmes. The core aims were then grouped in relation to the level at which the intervention was aimed: individual or system. The core individual aims identified included improved mental well-being, improved physical well-being and improved social well-being. The core system level aims included optimised health service use and decreased health service cost. Only nine studies stated a single aim. The majority of studies thus stated multiple aims: 16 stated two, 10 stated three, four stated four and one study stated five aims. Nineteen studies focused on both individual and system level outcomes (see Supplementary Appendix 2 for full details). Improved mental well-being was the most common core aim, with 25 of 42 studies. Physical well-being, social well-being and optimised service use were also frequently cited with 16, 21 and 23 studies, respectively. Six studies addressed the least common core aim of cost savings.

The mental well-being core aim was generally characterised by mental health or general well-being. Improved psychosocial state was considered to be both related to social and mental well-being. Physical well-being included both general health and the improvement of long term health conditions, like kidney disease. Social well-being included improvements in social and community engagement and quality of life. Health service use and cost aims included reductions in emergency department use, GP use, hospital stay length and other forms of primary care costs. The service use aim also included instances where researchers were aiming to increase the uptake of community services. See Appendix 2 for more detail on aims.

Table 2 outlines the measures and methods used to evaluate the social referral projects by frequency. Across all aims these included administrative data/analysis, physical health questionnaires, mental health diagnostic measures, qualitative assessments and social/behavioural questionnaires. Across the 41 studies and reports, 154 different kinds of measures or methods of evaluation were identified (see Appendix 2). Twenty-one measures or methods were used more than once, however many of these were forms of administrative data counts. The most commonly used scale was the Warwick-Edinburgh Mental Well-being Scale, used in nine studies.

**Table 2:** Measures and Methods Used in Studies/Reports of Social Referral by Frequency (n=41)\*

| <b>Measure/Method</b>                                     | <b>Number of Studies/Reports Using Measure/Method</b> | <b>Examples of Programme Aims Addressed**</b>                                            |
|-----------------------------------------------------------|-------------------------------------------------------|------------------------------------------------------------------------------------------|
| Semi-structured interviews to explore patient experience. | 14                                                    | n/a***                                                                                   |
| Warwick Edinburgh Mental Wellbeing Short Scale            | 9                                                     | Improved Mental Well-being<br>Improved Physical Well-being<br>Improved Social Well-being |
| Number of GP Appointments                                 | 6                                                     | Optimised Health                                                                         |

|                                                                                                  |   |                                                                                                       |
|--------------------------------------------------------------------------------------------------|---|-------------------------------------------------------------------------------------------------------|
| (administrative)                                                                                 |   | Service Use<br>Reduced Health Service<br>Cost<br>Improved Physical Well-<br>being                     |
| Short case description of participant<br>experience                                              | 6 | Improved Physical Well-<br>being<br>Improved Social Well-<br>being<br>Optimised Health<br>Service Use |
| Emergency Department<br>Admissions/Hospital Episode Statistics<br>(administrative)               | 6 | Optimised Health<br>Service Use                                                                       |
| Demographic questions                                                                            | 5 | Improved Mental<br>Wellbeing.                                                                         |
| Cost Analysis                                                                                    | 5 | Reduced Health Service<br>Cost<br>Optimised Health<br>Service Use                                     |
| Hospital Anxiety and Depression Scale                                                            | 5 | Improved Mental Well-<br>being<br>Improved Physical Well-<br>being                                    |
| Focus group with patients to explore patient<br>outcomes                                         | 4 | n/a***                                                                                                |
| General Health Questionnaire-12                                                                  | 3 | Improved Mental<br>Wellbeing<br>Improved Physical<br>Wellbeing<br>Optimised Health<br>Service Use     |
| Number of Secondary Referrals<br>(administrative)                                                | 3 | Reduced Health Service<br>Cost                                                                        |
| Geriatric Depression scale                                                                       | 2 | Improved Mental<br>Wellbeing                                                                          |
| Focus Group with family members who<br>engaged with the service to explore service<br>experience | 2 | n/a***                                                                                                |
| Hospital Admissions Length<br>(administrative)                                                   | 2 | Optimised Health<br>Service Use                                                                       |
| Reason for Referral                                                                              | 2 | Improved Mental<br>Wellbeing<br>Optimised Health<br>Service Use                                       |
| Referral records (e.g. what activities were<br>referred to)                                      | 2 | Improved Social<br>Wellbeing<br>Reduced Health Service<br>Cost                                        |
| Social Return on Investment Analysis                                                             | 2 | Improved Mental                                                                                       |

|                                                                   |   |                                                           |
|-------------------------------------------------------------------|---|-----------------------------------------------------------|
|                                                                   |   | Wellbeing                                                 |
| Work and Social Adjustment Scale                                  | 2 | Improved Social Wellbeing                                 |
| Number of Hospital Admissions (administrative)                    | 2 | Optimised Health Service Use                              |
| Number of Prescriptions for Psychosocial Reasons (administrative) | 2 | Optimised Health Service Use<br>Improved Mental Wellbeing |

\*Where the measure or method was used in n>1 report or study.

\*\*These are only example aims because it was not always clear how each aim and measure matched up

\*\*\*Not applicable as the qualitative semi-structured interviews and focus groups were exploratory and did not have a specific programme aim to measure.

## DISCUSSION

Examination of the aims of studies seeking to evaluate social referral initiatives and the measures used to evaluate their outcome has revealed extensive heterogeneity. This is unsurprising considering the variability in populations and types of programmes and is not problematic per se. We will discuss the various aims of social referral and the implications of the variety of measures used before considering what this variability means for the future of social referral programmes. In doing so it is important to reiterate the hugely varied nature of the events and opportunities to which people are being referred, as well as the substantial variety of recipients of this referral. Whilst we expect variation in programme aims and measures, these varied programmes were included because they all aimed to link individuals with community and health care services. It is therefore reasonable to assume that there would be some kind of consistency in the measures used to address particular aims.

### *Aims of social referral*

The vast majority of studies, 32 out of the total 41, included multiple aims. Nineteen of these were concerned with both individual and system level outcomes (see Table 1 and Supplementary Appendix 2), for example mental wellbeing and health service costs. While a

1  
2  
3 single study containing aims at individual and system level is not problematic as such, what is  
4  
5 problematic is the lack of articulation of the presumed causal pathways from the treatment  
6  
7 programme to improved individual health and to better health care resource allocation. As a  
8  
9 thought experiment, an individual who is a frequent health service user and has poor control  
10  
11 over their diabetic care could, in theory, be empowered by a social referral service and  
12  
13 continue high levels of primary care access as they take greater ownership of their health.  
14  
15 Indeed a few studies have found an uptake in medical service use post-social referral<sup>34 53 54</sup>. It  
16  
17 is also important to note that when reviewing the grey literature, and indeed some of the  
18  
19 academic literature as well, the aims of the programme were not always clearly stated. It is  
20  
21 reasonable for programmes to try to address multiple aims, however it is not acceptable for  
22  
23 these programmes not to theorise, test and critically evaluate the relationship between them.  
24  
25  
26

### 27 *Measures of social referral*

28  
29  
30 Measuring what ‘works’ is inherently linked to defining what these programmes  
31  
32 intend to do and requires meaningful, specific and comparable indices. The diversity of  
33  
34 measures evident in social referral initiatives, often associated with a series of vaguely similar  
35  
36 aims, suggests that what programmes are aiming to do is often different despite having  
37  
38 notionally similar programme structures. Additionally of course it is important to take into  
39  
40 account the role of population type and activity type in how aims are translated in to  
41  
42 measures. However, as seen in Table 2, measures used in social referral initiatives are  
43  
44 considerably more plentiful than their aims. For example, Bragg, et al.<sup>30</sup> used 12 different  
45  
46 tools in their evaluation of an eco-therapy programme. The multiple measures both within  
47  
48 and between studies renders comparability between studies, even those addressing the same  
49  
50 or similar aims, impossible. Similarly, we could not meaningfully narrow them to provide  
51  
52 recommendations on preferred measures. Where there were multiple aims, papers rarely  
53  
54 stated which measure was meant to address which aim. While we might infer that  
55  
56  
57  
58  
59  
60

1  
2  
3 administrative counts of GP visits would measure GP use, the assumed relationship between  
4  
5 number of GP visits and physical wellbeing is less clear. Clarity of reporting in the  
6  
7 hypothesised relationship between aims and outcome measures is vital in understanding the  
8  
9 causal mechanisms that link a programme and with its outcomes. From one perspective,  
10  
11 measuring the same outcome in several ways could lead to a more robust proof of effect. In  
12  
13 theory this could lead to a stronger evidence base about the effect of social referral on  
14  
15 individual and system level outcomes. A less generous explanation behind the proliferation of  
16  
17 measures is that researchers and evaluators do not have a definitive understanding of how  
18  
19 exactly the aim of their social referral service can translate in to measures. Where the aims  
20  
21 are not clearly set out, it may be that they are not being communicated well but the possible  
22  
23 explanation that the aims are unknown or unclear cannot be ruled out. It certainly suggests  
24  
25 that one of the essential building blocks for an evaluation of a complex health system<sup>55</sup>, that  
26  
27 is, establishing the current evidence base, has not been undertaken and/or understood.  
28  
29 Establishing the evidence base constitutes a crucial springboard for developing hypotheses as  
30  
31 to the mechanisms through which social prescribing programmes might improve social  
32  
33 wellbeing and, ultimately, physical and health outcomes. Identification with the group, for  
34  
35 example, rather than simply engaging in group activities may be one such mechanism<sup>56</sup>.

36  
37  
38  
39  
40  
41 In the final analysis, whilst there is a notable policy push for the implementation of  
42  
43 social referral programmes, definitive and systematic evaluations of social referral  
44  
45 programmes are not possible while aims and measures are so inconsistent. As a caveat, one  
46  
47 can expect that where populations, and activities vary one can expect different measures.  
48  
49 However, where social referral programmes aim to do similar things, measures that are  
50  
51 similar should follow, for example the Short Warwick-Edinburgh Mental Wellbeing Scale is  
52  
53 not population, nor activity specific. We hope that this review provides a first step towards  
54  
55 categorising the aims of social referral programmes, i.e. to improve physical, mental, and  
56  
57  
58  
59  
60

1  
2  
3 social health, as well as reducing costs and improving health care resource allocation.  
4  
5 Although these aims are broad, they provide a framework for highlighting what it is  
6  
7 programmes intend to do, and not do, and identifying which measures might best be used to  
8  
9 assess different types of aims. This would be a start in applying a more consistent  
10  
11 methodology.  
12  
13

14  
15 The solution to the issue of aim and measurement variability in programmes is not to  
16  
17 give up on social referral in general. Certainly the incorporation of social and mental well-  
18  
19 being within traditional biomedical health systems seems an essential step in tackling  
20  
21 relatively recent problems in health care, e.g. services for aging populations, and may create  
22  
23 new opportunities for people who are stagnated in their ability to access services that improve  
24  
25 their health. However at this time, despite policy claims of value and claims of the  
26  
27 effectiveness of individual programmes, reviews of these programmes are clear that we do  
28  
29 not have evidence that this is the case<sup>9 12-15 57-59</sup>. We would argue that whilst aims and  
30  
31 measures remain diffuse and the links between them under theorised and under specified that  
32  
33 we actually *cannot* know that this is the case. We call on researchers and evaluators alike to  
34  
35 consider the active ingredients of their programmes and in doing so echo a similar call made  
36  
37 by the University of York asking, simply, for whom, in what context, how, and why do they  
38  
39 intend to prescribe social activities<sup>9</sup>? And while these can be challenging to answer, if we do  
40  
41 not know the answers to these simple questions, how can we possibly prepare a prescription?  
42  
43  
44  
45

#### 46 **Strengths and weaknesses**

47  
48  
49 Although this review has been systematically conducted providing a transparent account of  
50  
51 the process, we cannot guarantee this has included all relevant social referral programmes.  
52  
53 ‘Social prescribing’ is a generalised UK region-specific term for medical-based referral to  
54  
55 non-medical services. There are likely social referral-like programmes in other countries that  
56  
57  
58  
59  
60

1  
2  
3 are not easily identified. Every effort was made to be as inclusive as possible in phrasing but  
4  
5 there will inevitably be some studies missed. Conversely, the strength of our analysis is our  
6  
7 inclusion of both grey and academic literature. By including non-academic reports we  
8  
9 analysed valuable literature that would normally not be included in reviews. As well, this  
10  
11 review is a first step in creating consistency and justification for the inclusion of social  
12  
13 referral programmes in broader nationwide initiatives to address the social ills of health. The  
14  
15 contribution of our approach to reviewing social referral is valuable due to its focus on aims  
16  
17 and measures rather than, as is the case in other reviews, the outcomes of programmes.  
18  
19

## 20 21 **CONCLUSION**

22  
23  
24 This review aimed to analyse and summarise the aims and measures used in the  
25  
26 evaluation of social referral programmes. Social referral is variously described as social  
27  
28 prescribing, community referral and emergency case management among other terms. We  
29  
30 found great variation in the aims of these projects including aims to improve mental well-  
31  
32 being, physical health, social well-being and costs savings. We further found that measures  
33  
34 used to analyse these aims were highly varied. We would suggest that a next step to  
35  
36 addressing the social determinants of health in primary and secondary care is to derive more  
37  
38 differentiated and concrete definitions of social referral that more specifically reflect what  
39  
40 practitioners and commissioners intend for programmes to achieve and thus to dispense with  
41  
42 a general notion of social referral often uncritically considered as the ‘golden child’ of cost  
43  
44 savings and improved mental health. However, by setting clear aims and using appropriate  
45  
46 measures, social referral can move beyond pilot studies and in to general practice. To that  
47  
48 end, we must endeavour to respond to Walt Disney’s call to “diagnose and prepare the  
49  
50 prescription”<sup>1</sup>.  
51  
52  
53  
54  
55  
56  
57  
58  
59  
60



1  
2  
3  
4  
5  
6  
7  
8  
9  
10  
11  
12  
13  
14  
15  
16  
17  
18  
19  
20  
21  
22  
23  
24  
25  
26  
27  
28  
29  
30  
31  
32  
33  
34  
35  
36  
37  
38  
39  
40  
41  
42  
43  
44  
45  
46  
47  
48  
49  
50  
51  
52  
53  
54  
55  
56  
57  
58  
59  
60

For peer review only

## STATEMENTS

### Funding

This work was supported by Innovate UK, project code: 102412-399209.

### Data Sharing

Full coding guidelines and summaries for all articles included can be found in the Supplementary Appendix 1 and Supplementary Appendix 2.

### Competing Interests

None declared.

### Contributions

ESR, JCB and HD designed the study protocol. ESR conducted the database searching, while ESR and ENW conducted the data extraction. The report was written by ESR and JCB. All authors edited the manuscript.

### Acknowledgements

The authors would like to acknowledge the support of the 'Collaborating to Deliver Social Prescribing in Bath and North East Somerset' Project Team, in particular Developing Health & Independence, the Wellbeing College, Second Step, Bath & North East Somerset Council, led by Digital Algorithms Ltd.

## References

1. Disney W. Film entertainment and community life. *The Journal of the American Medical Association* 1958;**167**(11):1342-45.
2. Marmot M, UCL Institute of Health Equity. Review of social determinants and the health divide in the WHO European Region: final report. Copenhagen: WHO Regional Office for Europe, 2014.
3. Marmot MG, Stansfeld S, Patel C, et al. Health inequalities among British civil servants: the Whitehall II study. *The Lancet* 1991;**337**(8754):1387-93.
4. Marshall M. A precious jewel-The role of general practice in the English NHS. *New England Journal of Medicine* 2015;**372**(10):893-97.
5. Kimberlee R, Ward R, Jones M, et al. Proving our value: Measuring the economic impact of Wellspring Health Living Centre's social prescribing *Wellbeing Programme* for low level mental health issues encountered by GP services. Bristol: University of the West of England, 2014.
6. Kimberlee R. Developing a Social Prescribing approach for Bristol: University of the West of England, 2013.
7. NHS. NHS Five Year Forward View. England: National Health Institute, 2014.
8. Dyson B. Improving general practice: A call to action – phase one report. London, UK: NHS England, 2014.
9. The University of York Centre for Reviews and Dissemination. Evidence to inform the commissioning of social prescribing. York: University of York, 2015.
10. Kimberlee R. What is social prescribing? *Advances in Social Sciences Research Journal* 2015;**2**(1):102-10.
11. Bungay H, Clift S. Arts on Prescription: A review of practice in the UK. *Perspectives in Public Health* 2010;**130**(6):277-81.
12. South J, Higgins TJ, Woodall J, et al. Can social prescribing provide the missing link? *Primary Health Care Research & Development* 2008;**9**(04):310.
13. Mossabir R, Morris R, Kennedy A, et al. A scoping review to understand the effectiveness of linking schemes from healthcare providers to community resources to improve the health and well-being of people with long-term conditions. *Health & social care in the community* 2015;**23**(5):467-84.
14. Kumar GS, Klein R. Effectiveness of case management strategies in reducing emergency department visits in frequent user patient populations: a systematic review. *The Journal of emergency medicine* 2013;**44**(3):717-29.
15. Soril LJ, Leggett LE, Lorenzetti DL, et al. Reducing frequent visits to the emergency department: a systematic review of interventions. *PLoS One* 2015;**10**(4):e0123660.
16. Pawson R, Tilley N. *Realistic Evaluation*. London: SAGE, 1997.
17. Lee K-H, Davenport L. Can case management interventions reduce the number of emergency department visits by frequent users? *The Health Care Manager* 2006;**25**(2):155-59.
18. Stickley T, Hui A. Social prescribing through arts on prescription in a U.K. city: participants' perspectives (part 1). *Public health* 2012;**126**(7):574-9.
19. White J, Kinsella K, South J. An evaluation of social prescribing health trainers in South and West Bradford. Leeds: Leeds Metropolitan University, 2010.
20. Friedli L, Themessl-Huber M, Butchart M. Evaluation of Dundee Equally Well Sources of Support: Social prescribing in Maryfield Evaluation report four. Dundee: Equally Well Dundee, 2012.
21. Garety PA, Craig TKJ, Dunn G, et al. Specialised care for early psychosis: symptoms, social functioning and patient satisfaction. *British Journal of Psychiatry* 2006;**188**(1):37-45.

22. Greaves CJ, Farbus L. Effects of creative and social activity on the health and well-being of socially isolated older people: outcomes from a multi-method observational study. *The Journal of the Royal Society for the Promotion of Health* 2006;**126**(3):134-42.
23. Crawford M, Rutter D, Price K, et al. Learning the lessons: a multi-method evaluation of dedicated community-based services for people with personality disorder: National Co-ordinating Centre for NHS Service Delivery and Organisation R&D (NCCSDO), 2007.
24. Faulkner M. Supporting the psychosocial needs of patients in general practice: the role of a voluntary referral service. *Patient Education and Counseling* 2004;**52**(1):41-46.
25. Grayer J, Cape J, Orpwood L, et al. Facilitating access to voluntary and community services for patients with psychosocial problems: a before-after evaluation. *BMC family practice* 2008;**9**:27.
26. Okin RL, Boccellari A, Azocar F, et al. The effects of clinical case management on hospital service use among ED frequent users. *The American journal of emergency medicine* 2000;**18**(5):603-8.
27. Stickley T, Eades M. Arts on prescription: a qualitative outcomes study. *Public health* 2013;**127**(8):727-34.
28. Innovation Unit. Wigan community link worker service evaluation. London: Innovation Unit, 2016.
29. City and Hackney Clinical Commissioning Group, University of East London. Shine 2014 final report social prescribing: Integrating GP and community assets for health. London: University of East London, 2014.
30. Bragg R, Wood C, Barton J. Ecominds effects on mental wellbeing: An evaluation for mind. Essex: University of Essex, 2013.
31. Newcastle West Clinical Commissioning Group. Social prescribing for mental health: An integrated approach project report. Newcastle: Newcastle West Clinical Commissioning Group, 2014.
32. Jones M, Kimberlee R, Deave T, et al. The role of community centre-based arts, leisure and social activities in promoting adult well-being and healthy lifestyles. *International journal of environmental research and public health* 2013;**10**(5):1948-62.
33. Baker K, Irving A. Co-producing Approaches to the Management of Dementia through Social Prescribing. *Social Policy & Administration* 2016;**50**(3):379-97.
34. Cohen GD, Perlstein S, Chapline J, et al. The impact of professionally conducted cultural programs on the physical health, mental health and social functioning of older adults. *The Gerontologist* 2006;**46**(6):726-34.
35. ERS Research and Consultancy. Newcastle social prescribing project: Final report. Newcastle upon Tyne: ERS Research and Consultancy, 2013.
36. Morton L, Ferguson M, Baty F. Improving wellbeing and self-efficacy by social prescription. *Public health* 2015;**129**(3):286-9.
37. Huxley P. Arts on Prescription: An Evaluation. United Kingdom, 1997.
38. The Care Forum. New routes: End of project report. Bristol, UK: The Care Forum, 2015.
39. Kilroy A, Garner C, Parkinson C, et al. Towards Transformation: Exploring the impact of culture, creativity and the arts on health and wellbeing: A consultation report for the critical friends event. Manchester, UK: Arts for Health, Manchester Metropolitan University, 2007.
40. Grant C, Goodenough T, Harvey I, et al. A randomised control trial and economic evaluation of a referrals facilitator between primary care and the voluntary sector. *British Medical Journal* 2000;**320**(7232):419-23.
41. White M, Salamon E. An interim evaluation of the 'Arts For Well-being' social prescribing scheme in County Durham. Durham: Centre for Medical Humanities, Durham University, 2010.
42. Ramsbottom H, Volpe J, Pantelic V. Social prescribing: A model for partnership working between primary care and the voluntary sector. London: Age UK, n.d.

- 1
- 2
- 3 43. Blakeman T, Blickem C, Kennedy A, et al. Effect of information and telephone-guided access to
- 4 community support for people with chronic kidney disease: randomised controlled trial.
- 5 PLoS One 2014;**9**(10):e109135.
- 6
- 7 44. Liao M-C, Chen L-K, Chou M-Y, et al. Effectiveness of Comprehensive Geriatric Assessment-Based
- 8 Intervention to Reduce Frequent Emergency Department Visits: A Report of Four Cases.
- 9 International Journal of Gerontology 2012;**6**(2):131-33.
- 10
- 11 45. Vogelpoel N, Jarrold K. Social prescription and the role of participatory arts programmes for
- 12 older people with sensory impairments. Journal of Integrated Care 2014;**22**(2):39-50.
- 13
- 14 46. Dayson C, Bashir N. The social and economic impact of the Rotherham Social Prescribing Pilot:
- 15 Summary evaluation report. Sheffield: Sheffield Hallam University, 2014.
- 16
- 17 47. Reinius P, Johansson M, Fjellner A, et al. A telephone-based case-management intervention
- 18 reduces healthcare utilization for frequent emergency department visitors. European
- 19 Journal of Emergency Medicine 2013;**20**(5):327-34.
- 20
- 21 48. Blickem C, Kennedy A, Jariwala P, et al. Aligning everyday life priorities with people's self-
- 22 management support networks: An exploration of the work and implementation of a needs-
- 23 led telephone-based support system. BMC Health Services Research 2014;**14**(262):1-12.
- 24
- 25 49. Goodhart C, Layzell S, Cook A, et al. Family support in general practice. Journal of the Royal
- 26 Society of Medicine 1999;**92**(10):525-28.
- 27
- 28 50. Hudon C, Chouinard MC, Diadiou F, et al. Case Management in Primary Care for Frequent Users
- 29 of Health Care Services With Chronic Diseases: A Qualitative Study of Patient and Family
- 30 Experience. Annals of family medicine 2015;**13**(6):523-8.
- 31
- 32 51. Skinner J, Carter L, Haxton C. Case management of patients who frequently present to a Scottish
- 33 emergency department. Emergency medicine journal : EMJ 2009;**26**(2):103-5.
- 34
- 35 52. Tadros AS, Castillo EM, Chan TC, et al. Effects of an emergency medical services-based resource
- 36 access program on frequent users of health services. Prehospital emergency care : official
- 37 journal of the National Association of EMS Physicians and the National Association of State
- 38 EMS Directors 2012;**16**(4):541-7.
- 39
- 40 53. Maughan DL, Patel A, Parveen T, et al. Primary-care-based social prescribing for mental health:
- 41 an analysis of financial and environmental sustainability. Primary health care research &
- 42 development 2016;**17**(2):114-21.
- 43
- 44 54. Gupta K, Coupland L, Fottrell E. A two-year review of an 'open access' multidisciplinary
- 45 community psychiatric service for the elderly. International Journal of Geriatric Psychiatry
- 46 1996;**11**(9):795-99.
- 47
- 48 55. Lamont T, Barber N, de Pury J, et al. New approaches to evaluating complex health and care
- 49 systems. BMJ 2016;**352** (i154):1-5.
- 50
- 51 56. Sani, F., Madhok, V., Norbury, M., et al. Greater number of group identifications is associated
- 52 with healthier behaviour: Evidence from a Scottish community sample. British Journal of
- 53 Health Psychology, 2015;**20**(3), 466-481. doi:10.1111/bjhp.12119
- 54
- 55 57. Thomson LJ, Camic PM, Chatterjee HJ. Social prescribing: A review of community referral
- 56 schemes. London: University College London, 2015.
- 57
- 58 58. Kinsella S. Social prescribing: A review of the evidence. Wirral: Wirral Council Business & Public
- 59 Health Intelligence Team, 2015.
- 60
- 59 59. Bickerdike L, Booth A, Wilson PM, et al. Social prescribing: less rhetoric and more reality. A
- systematic review of the evidence. BMJ open 2017;**7**(4):e013384.

1  
2  
3  
4  
5  
6  
7  
8  
9  
10  
11  
12  
13  
14  
15  
16  
17  
18  
19  
20  
21  
22  
23  
24  
25  
26  
27  
28  
29  
30  
31  
32  
33  
34  
35  
36  
37  
38  
39  
40  
41  
42  
43  
44  
45  
46  
47  
48  
49  
50  
51  
52  
53  
54  
55  
56  
57  
58  
59  
60

Figure Legends:

Figure 1: PRISMA Flow Diagram

Figure 1 shows the PRISMA Flow Diagram for the literature search strategy for 'social referral' programmes. The main criteria for inclusion was an empirical assessment of a programme that contained a patient referral out of the health care system and in to the community or voluntary system. 645 articles and reports were initially identified and assessed for duplication and relevance. 41 articles and reports were then assessed for full-text eligibility. 18 articles or reports were identified. The citations and reference lists for the academic articles were searched for additional literature, alongside other non-eligible review papers, as well as the reference lists of the non-academic reports. This resulted in 23 articles further identified as relevant. A final 41 studies were included in the qualitative synthesis.

Figure 2: 'Social Referral' Process

Figure 2 shows a summary of the social referral process identified in the literature search. All programmes' participants were identified by various indicators of need, for example low level mental health conditions, within the health care sector. The participants were then provided with either a facilitated or non-facilitated referral to a community or voluntary activity. Patient identification and referral represent the 'process' while the activity represents the 'treatment' of social referral programmes. Finally, the proposed outcomes included either improved individual well-being, for example mental wellbeing, and/or system-level improvement, for example reallocated health care resources.

review only

1  
2  
3  
4  
5  
6  
7  
8  
9  
10  
11  
12  
13  
14  
15  
16  
17  
18  
19  
20  
21  
22  
23  
24  
25  
26  
27  
28  
29  
30  
31  
32  
33  
34  
35  
36  
37  
38  
39  
40  
41  
42  
43  
44  
45  
46  
47  
48  
49  
50  
51  
52  
53  
54  
55  
56  
57  
58  
59  
60

Figure 1: PRISMA Flow Diagram

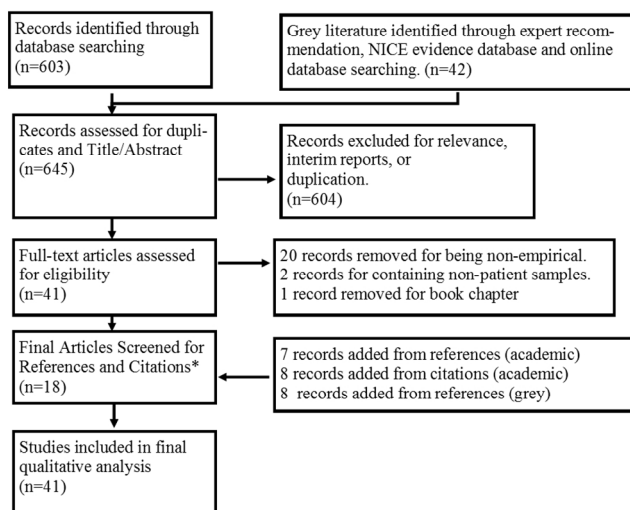

\*Additional articles (e.g. review and non-empirical papers) that did not meet inclusion criteria in previous search stages were also hand-searched for citations and references.

Figure 1

1  
2  
3  
4  
5  
6  
7  
8  
9  
10  
11  
12  
13  
14  
15  
16  
17  
18  
19  
20  
21  
22  
23  
24  
25  
26  
27  
28  
29  
30  
31  
32  
33  
34  
35  
36  
37  
38  
39  
40  
41  
42  
43  
44  
45  
46  
47  
48  
49  
50  
51  
52  
53  
54  
55  
56  
57  
58  
59  
60



Figure 2

297x209mm (150 x 150 DPI)

View only



1  
2  
3 **Supplementary File 1: Search strategy**  
4

5 **Example Database Search Terms: PubMed\***  
6

7 1- ("social prescribing"[All Fields] OR "social prescribing services"[All Fields] OR "social  
8 prescription"[All Fields] OR "social prescriptions"[All Fields]) OR ("community referrals"[All  
9 Fields] OR "community referred"[All Fields] OR "community referred patients"[All Fields] OR  
10 "community referring physicians"[All Fields] OR "community refers"[All Fields])  
11

12 \*No other restrictions were applied, for example there were no date or article type restrictions.  
13

14 **Other databases searched:**

15 SCOPUS, Web of Science, NICE Evidence Guidelines, Google, and PsycNET.  
16  
17  
18  
19  
20  
21  
22  
23  
24  
25  
26  
27  
28  
29  
30  
31  
32  
33  
34  
35  
36  
37  
38  
39  
40  
41  
42  
43  
44  
45  
46  
47  
48  
49  
50  
51  
52  
53  
54  
55  
56  
57  
58  
59  
60

1  
2  
3  
4  
5  
6  
7  
8  
9  
10  
11  
12  
13  
14  
15  
16  
17  
18  
19  
20  
21  
22  
23  
24  
25  
26  
27  
28  
29  
30  
31  
32  
33  
34  
35  
36  
37  
38  
39  
40  
41  
42  
43  
44  
45  
46  
47

Appendix 1: Social Referral Programme Design

| Reference                      | Programme name                                                             | Study design*                                                                 | Stated aim of social referral programme                                                                                                        | Programme design                             | Referral criteria                                                                      | Study/Programme location | Number of programme participants | Number of study participants      |
|--------------------------------|----------------------------------------------------------------------------|-------------------------------------------------------------------------------|------------------------------------------------------------------------------------------------------------------------------------------------|----------------------------------------------|----------------------------------------------------------------------------------------|--------------------------|----------------------------------|-----------------------------------|
| BAKER, K. AND A. IRVING (2016) | Not listed.                                                                | Immediate post-intervention qualitative interview and focus group study.      | To reduce isolation / loneliness and improve wellbeing.                                                                                        | Non-specific social prescribing service      | Individuals with early onset dementia and depression living semi or fully-independent. | NE England, UK           | Not listed.                      | n=30                              |
| BLAKEMAN, T., ET AL. (2014)    | BRinging Information and Guided Help Together (BRIGHT)                     | 6-month pragmatic, two-arm, patient level randomised control trial            | To support the self-management of long-term health conditions, improving health / wellbeing and at a reduced cost.                             | Telephone-guided access to Community Support | Patients with stage 3 Chronic Kidney Disease                                           | Greater Manchester, UK   | N=436                            | n=436 (n=215 to intervention arm) |
| BLICKEM, C., ET AL. (2014)     | Patient-Led Assessment for Network Support (PLANS) as part of BRIGHT trial | Two-week follow-up qualitative interview, focus group, and observation study. | To improve the self-management of long-term health conditions through community support and engagement.                                        | Telephone support service.                   | Patients with stage 3 Chronic Kidney Disease                                           | Greater Manchester, UK   | N=207                            | n=20                              |
| BRAGG, R., ET AL. (2013)       | Ecominds                                                                   | Flexible timeline before-after study.                                         | To improve psychological health and wellbeing (confidence, self-esteem, physical and mental health), social inclusion and connection to nature | Eco-therapy programme.                       | Individuals with mental health problems.                                               | England, UK              | Not listed.                      | n=803                             |

|                                                                                    |                                     |                                                                                                                                                            |                                                                                                                                                                                        |                                                                       |                                                                                                    |                    |                                                            |                                                                                                                                          |
|------------------------------------------------------------------------------------|-------------------------------------|------------------------------------------------------------------------------------------------------------------------------------------------------------|----------------------------------------------------------------------------------------------------------------------------------------------------------------------------------------|-----------------------------------------------------------------------|----------------------------------------------------------------------------------------------------|--------------------|------------------------------------------------------------|------------------------------------------------------------------------------------------------------------------------------------------|
| CITY AND HACKNEY CLINICAL COMMISSIONING GROUP AND UNIVERSITY OF EAST LONDON (2014) | City and Hackney Social Prescribing | 8-month follow-up, prospective cohort-control and interview study                                                                                          | To reduce social isolation, better manage long-term conditions, improve health/well-being, increase take-up of community activities and support individuals to visit GP/hospital less. | GP-referred, facilitated social prescribing programme.                | Non-specific, targeted social isolation but includes a range of social and mental health problems. | London, UK         | N=737                                                      | n-15 qualitative, n-486 quantitative (n=184 to intervention arm)                                                                         |
| COHEN, G. D., ET AL. (2006)                                                        | Creativity and Aging Study          | Baseline to 12-month follow-up quasi-experimental prospective cohort-comparison study.                                                                     | To improve physical and mental health and social engagement.                                                                                                                           | Self-referred weekly cultural activity groups.                        | Ambulatory individuals over 64.                                                                    | Washington DC, USA | N=>300                                                     | n=166                                                                                                                                    |
| CRAWFORD, M., ET AL. (2007)                                                        | Community Links Service             | Semi-structured interview study, 12-month follow-up, before-after study.                                                                                   | To improve service use, address psychosocial needs and decrease the risk for social exclusion for individuals with personality disorder.                                               | GP or primary care referred facilitated social prescribing programme. | Individuals diagnosed with a personality disorder, or exhibiting interpersonal problems.           | London, UK         | N=76 (assumed based on report, but service was anonymised) | n=11 quantitative, n=12 for qualitative                                                                                                  |
| DAYSON, C. AND N. BASHIR (2014)                                                    | Rotherham Social Prescribing Pilot  | 6- and 12-month before-after cohort study for administrative data. 3-4-month follow-up cohort study for wellbeing measures. Plus qualitative case studies. | To improve health and social outcomes of individuals with long term conditions and to reduce the use of NHS services to decrease cost.                                                 | GP referred facilitated social prescribing programme.                 | Individuals with long-term health conditions.                                                      | Rotherham, UK      | N=1607                                                     | n-280 quantitative (wellbeing), n-108 quantitative (12 month follow-up), n=451 (6 month follow-up), n=unknown qualitative (case studies) |

|                                          |                                                           |                                                                                           |                                                                                                                                                                                               |                                                                     |                                                                                                                                                                                                 |               |       |                                                                           |
|------------------------------------------|-----------------------------------------------------------|-------------------------------------------------------------------------------------------|-----------------------------------------------------------------------------------------------------------------------------------------------------------------------------------------------|---------------------------------------------------------------------|-------------------------------------------------------------------------------------------------------------------------------------------------------------------------------------------------|---------------|-------|---------------------------------------------------------------------------|
| ERS RESEARCH AND CONSULTANCY (2013)      | Newcastle Social Prescribing Project.                     | Before-after study and interview study. Plus general demographic analysis.                | To improve the physical, mental and social wellbeing of individuals managing long-term conditions and to reduce health service use to reduce cost.                                            | GP referred link worker social prescribing programme.               | Mostly individuals with long term health conditions and mental health problems but also problems with social networks/lifestyle.                                                                | Newcastle, UK | N=124 | n=9 qualitative, n=16 quantitative                                        |
| FAULKNER, M. (2004)                      | Patient Support Service (PSS)                             | Semi-structured interview 1-month post intervention                                       | To improve the psychosocial state of individuals.                                                                                                                                             | GP or Practice Nurse referred voluntary community referral service. | Patients 18 or over, with psychosocial problems, without other co-occurring concerns like behavioural problems.                                                                                 | Doncaster, UK | N=34  | n=11                                                                      |
| FRIEDLI, THEMESL-HUBER & BUTCHART (2012) | Sources of Support from the Dundee Equally Well Test Site | Before-after comparison study, interview study, and cross-sectional demographic analysis. | To improve mental wellbeing uptake of local services, participation in community activities, social support/contact/networks. And to enhance skills/behaviours that improve mental wellbeing. | GP referred, facilitated social prescribing service                 | Open but targeting individuals with poor mental wellbeing related to social circumstances, mild to moderate depression or anxiety, long term mental/physical conditions and frequent attenders. | Dundee, UK    | N=123 | n=16 for before-after study, n=12 interview study, n=123 cross-sectional, |
| GARETY, P.A., ET AL. (2006)              | Lambeth Early Onset Team Care                             | Randomised control trial with 18-month follow-up                                          | To help individual retain/recover functional capacity to study or work and/or re-establish supportive social networks.                                                                        |                                                                     | Individuals aged 16-40 for present for a first time with a non-affective psychosis.                                                                                                             | Lambeth, UK   | N=144 | n=71 to intervention, n=73 control                                        |

|                                                                   |                                     |                                                                             |                                                                                                                                           |                                                                                                            |                                                                                           |                                                                                                                                                                                                                                                                                                                                              |                  |                            |                                                  |
|-------------------------------------------------------------------|-------------------------------------|-----------------------------------------------------------------------------|-------------------------------------------------------------------------------------------------------------------------------------------|------------------------------------------------------------------------------------------------------------|-------------------------------------------------------------------------------------------|----------------------------------------------------------------------------------------------------------------------------------------------------------------------------------------------------------------------------------------------------------------------------------------------------------------------------------------------|------------------|----------------------------|--------------------------------------------------|
| 1<br>2<br>3<br>4<br>5<br>6<br>7<br>8<br>9<br>10<br>11<br>12<br>13 | GOODHART, C., ET AL. (1999)         | WellFamily Project                                                          | Semi-structured interviews with patients and before-after study (following whether what patients wanted from service was met by referral) | To support individuals experience social difficulties.                                                     | GP referred, facilitated family and individual social prescribing service.                | Families in need who fall below social services threshold. Specifically individuals who are isolated, depressed, frequent attenders with psychosocial problems, families concerns about child's behaviour, families that have difficulty providing adequate levels of care, and individuals concerned about welfare of other family members. | London, UK       | N=136 patients or families | n=20 interview study, n=136 referrals            |
| 14<br>15<br>16<br>17<br>18                                        | GRANT, C., ET AL. (2000)            | Almathea Project                                                            | Two-arm randomised control trial with one and four month follow-up.                                                                       | To improve patient quality of life and provide better management of psychosocial problems in primary care. | GP referred, referrals facilitation service between primary care and voluntary sector     | Patients 16 or over who have psychosocial problems                                                                                                                                                                                                                                                                                           | Avon, UK         | N=161                      | n=161 (n=90 to intervention arm)                 |
| 19<br>20<br>21<br>22<br>23<br>24<br>25<br>26<br>27                | GRAYER, J., ET AL. (2008)           | Graduate Primary Care Mental Health Workers (GPC MHW) Community Link Scheme | Three month follow-up before-after study.                                                                                                 | To improve patient psychosocial wellbeing and to reduce primary care service use.                          | Primary care team referred, GPC MHW facilitated community and voluntary referrals service | Patients 18 or over with psychosocial problems.                                                                                                                                                                                                                                                                                              | London, UK       | N=108                      | n=108                                            |
| 28<br>29<br>30<br>31<br>32<br>33<br>34<br>35<br>36                | GREAVES, C. J. AND L. FARBUS (2006) | Upstream Healthy Living Centre                                              | Qualitative semi-structured interview study and focus groups. And 5-6 month and 10-12 month before-after study.                           | To improve physical and psychosocial health through active social contact.                                 | A self- or community referred mentoring service with referrals to social activities.      | Socially isolated older adults over the age of 50.                                                                                                                                                                                                                                                                                           | Devon, UK        | N=229                      | n=26 qualitative, n=172 quantitative at baseline |
| 37<br>38<br>39<br>40<br>41<br>42<br>43<br>44<br>45<br>46<br>47    | GUPTA, K., ET AL. (1996)            | Not listed.                                                                 | Cross-sectional GP and Patient experience survey and                                                                                      | To reduce hospital care use among elderly people and promote independent living                            | A multidisciplinary, community psychogeriatric service with                               | Psychiatrically at-risk elderly individuals.                                                                                                                                                                                                                                                                                                 | West Lambeth, UK | N=971                      | n=109                                            |

1  
2  
3  
4  
5  
6  
7  
8  
9  
10  
11  
12  
13  
14  
15  
16  
17  
18  
19  
20  
21  
22  
23  
24  
25  
26  
27  
28  
29  
30  
31  
32  
33  
34  
35  
36  
37  
38  
39  
40  
41  
42  
43  
44  
45  
46  
47

|                          |                                     |                                                                                                                  |                                                                                                                                                                                                                                                                                                                                                                                                                                  |                                                                                              |                                                                                                         |                |             |                                                                                    |
|--------------------------|-------------------------------------|------------------------------------------------------------------------------------------------------------------|----------------------------------------------------------------------------------------------------------------------------------------------------------------------------------------------------------------------------------------------------------------------------------------------------------------------------------------------------------------------------------------------------------------------------------|----------------------------------------------------------------------------------------------|---------------------------------------------------------------------------------------------------------|----------------|-------------|------------------------------------------------------------------------------------|
|                          |                                     | two-year retrospective study.                                                                                    |                                                                                                                                                                                                                                                                                                                                                                                                                                  | telephone support service                                                                    |                                                                                                         |                |             |                                                                                    |
| HUDON, C., ET AL. (2015) | VISAGES project                     | Retrospective descriptive semi-structured interview study.                                                       | To optimise health care coordination and reduce health service use.                                                                                                                                                                                                                                                                                                                                                              | Nurse-facilitated case management service for frequent primary care users                    | Patients aged 18-80 with at least one chronic health condition and who are frequent primary care users. | Quebec, Canada | Not listed. | n=25                                                                               |
| HUXLEY, P. (1997)        | The Arts on Prescription Project    | Before-after prospective study.                                                                                  | To increase the level of mental well-being of participants using a wide range of creative processes'. Other aims to provide arts opportunities, recommend appropriate arts activities, raise self-esteem/self-confidence, to 'encourage individuals to look after their own health by developing skills in self-assessment and making choices' and to 'encourage participants to take up further arts/leisure activities'. Pg 5. | Primary care referred arts on prescription programme, which assessment by psychiatric nurse. | People with mild to moderate depression.                                                                | Stockport, UK  | n=83        | n=33                                                                               |
| INNOVATION UNIT (2016)   | Wigan Community Link Worker Service | Semi-structured interview study and retrospective study (Plus a small, case study of 5 months before and after). | To improve health and wellbeing and reduce primary / acute care use through connections to community-based support.                                                                                                                                                                                                                                                                                                              | Primary care referred community social prescribing.                                          | Individuals with 'non clinical needs'                                                                   | Wigan, UK      | N=784       | n=784 quantitative, n=3 qualitative n=43 small quantitative before-after component |

|                                                                                                                      |                                                                                    |                                                   |                                                                           |                                                                                                                                                                                                |                                                                                    |                                                                                                                                                                                                                                                                       |                |                         |                                                                                                    |
|----------------------------------------------------------------------------------------------------------------------|------------------------------------------------------------------------------------|---------------------------------------------------|---------------------------------------------------------------------------|------------------------------------------------------------------------------------------------------------------------------------------------------------------------------------------------|------------------------------------------------------------------------------------|-----------------------------------------------------------------------------------------------------------------------------------------------------------------------------------------------------------------------------------------------------------------------|----------------|-------------------------|----------------------------------------------------------------------------------------------------|
| 1<br>2<br>3<br>4<br>5<br>6<br>7<br>8<br>9<br>10<br>11<br>12<br>13<br>14<br>15<br>16                                  | INNOVATION<br>UNIT AND<br>GREATER<br>MANCHESTER<br>PUBLIC HEALTH<br>NETWORK (2016) | Bromley-<br>by-Bow<br>Centre                      | A short case<br>study.                                                    | Not stated.                                                                                                                                                                                    | Healthy Living<br>Centre with GP<br>referred<br>facilitated social<br>prescribing  | Not stated.                                                                                                                                                                                                                                                           | London, UK     | N=700 'in<br>last year' | Not stated.                                                                                        |
| 17<br>18<br>19<br>20<br>21<br>22<br>23<br>24<br>25<br>26<br>27                                                       | JONES, M., ET<br>AL. (2013)                                                        | South West<br>Wellbeing<br>(SWWB)<br>Programme    | Follow-up<br>time varying<br>(average 110<br>days) before-<br>after study | To improve physical and<br>mental health and social<br>wellbeing.                                                                                                                              | Community-<br>based arts,<br>leisure, and<br>social activity<br>service.           | “A focus on individuals’<br>experiencing low level<br>mental ill health, long term<br>health conditions, low levels<br>of physical activity and/or<br>diet related ill health. These<br>criteria were combined with<br>low income and/or social<br>isolation.” p.1950 | SW England, UK | N=1848                  | n=687 at<br>follow-up                                                                              |
| 28<br>29<br>30<br>31<br>32<br>33<br>34<br>35<br>36<br>37<br>38<br>39<br>40<br>41<br>42<br>43<br>44<br>45<br>46<br>47 | KILROY, A., ET<br>AL. (2007)                                                       | Invest to<br>Save Arts in<br>Health<br>Evaluation | Before-after<br>study. Plus<br>interview<br>study.                        | (Various) To<br>empower/support<br>individuals to choose a<br>healthier lifestyle. And to<br>create a sense of well-<br>being/transform quality<br>of life for communities<br>and individuals. | Multi-referred,<br>including GP<br>referred, arts on<br>prescription<br>programme. | Varying across six<br>programmes including age<br>(55+) and individuals with<br>moderate/mild depression.                                                                                                                                                             | Manchester, UK | Unknown                 | Six<br>programmes<br>ranging<br>from n=7 to<br>n=35 for<br>quantitative,<br>unknown<br>qualitative |

|                                                                                                                      |                                          |                                                                                   |                                                                                                          |                                                                                                 |                                                                                                     |                                                                                                                               |                        |             |                                                                                                                                                    |
|----------------------------------------------------------------------------------------------------------------------|------------------------------------------|-----------------------------------------------------------------------------------|----------------------------------------------------------------------------------------------------------|-------------------------------------------------------------------------------------------------|-----------------------------------------------------------------------------------------------------|-------------------------------------------------------------------------------------------------------------------------------|------------------------|-------------|----------------------------------------------------------------------------------------------------------------------------------------------------|
| 1<br>2<br>3<br>4<br>5<br>6<br>7<br>8<br>9<br>10<br>11<br>12<br>13<br>14                                              | KIMBERLEE, R.,<br>ET AL. (2014)          | Wellspring<br>Healthy<br>Living<br>Centre's<br>Social<br>Prescribing<br>Programme | 3- and 12-<br>month before-<br>after cohort<br>study. Plus<br>semi-<br>structured<br>interview<br>study. | To improve wellbeing<br>(mental, spiritual and<br>physical) and reduce<br>health service cost.  | GP referred<br>facilitated social<br>prescribing<br>programme.                                      | Individuals with long term<br>health conditions.                                                                              | Bristol, UK            | N=128       | n-70<br>quantitative<br>(3 month<br>follow-up),<br>n=40<br>qualitative,<br>n-40 (12<br>month<br>follow-up<br>1), n-80 (12<br>month<br>follow-up 2) |
| 15<br>16<br>17<br>18<br>19<br>20                                                                                     | LEE, K.-H. AND L.<br>DAVENPORT<br>(2006) | Not listed.                                                                       | 5-month<br>before-after<br>study.                                                                        | To reduce the number of<br>emergency department<br>visits and improve patient<br>health.        | Nurse-facilitated<br>case management<br>for emergency<br>department<br>frequent users.              | Patients with three or more<br>emergency department visits<br>in one month.                                                   | Not listed (USA)       | N=50        | n=50                                                                                                                                               |
| 21<br>22<br>23<br>24<br>25<br>26<br>27                                                                               | LIAO, M.-C., ET<br>AL. (2012)            | Not listed.                                                                       | Detailed case<br>description.                                                                            | To reduce emergency<br>department use and<br>improve health through<br>targeted care.           | Comprehensive<br>geriatric<br>assessment<br>(CGA)-based<br>multidisciplinary<br>team (MDT)<br>care. | Patients 65 or older who<br>make five emergency<br>department visits over 30<br>days at any time in one year.                 | Not listed<br>(Taiwan) | Not listed. | n=4                                                                                                                                                |
| 28<br>29<br>30<br>31<br>32<br>33<br>34<br>35<br>36<br>37<br>38<br>39<br>40<br>41<br>42<br>43<br>44<br>45<br>46<br>47 | MAUGHAN, D. L.,<br>ET AL. (2016)         | The<br>Connect<br>Project/The<br>Eden<br>Timebank                                 | Retrospective<br>18-month<br>follow-up<br>cohort study.                                                  | To reduce healthcare<br>service use and the<br>subsequent financial and<br>environmental costs. | GP and<br>healthcare staff<br>referred<br>community<br>social prescribing<br>programme              | Adults with a 'common'<br>mental health conditions, not<br>in care, who had used<br>Connect services for at least<br>6 months | Carlisle, UK           | Not listed. | n=55 (n=26<br>to<br>intervention<br>arm)                                                                                                           |



|                                                    |                                       |                                                                                                    |                                                                                                                                             |                                                                                                        |                                                                                                                                               |                          |       |                                                            |
|----------------------------------------------------|---------------------------------------|----------------------------------------------------------------------------------------------------|---------------------------------------------------------------------------------------------------------------------------------------------|--------------------------------------------------------------------------------------------------------|-----------------------------------------------------------------------------------------------------------------------------------------------|--------------------------|-------|------------------------------------------------------------|
| MORTON, L., ET AL. (2015)                          | Not listed.                           | Before-after study.                                                                                | To improve mental wellbeing.                                                                                                                | Mental health professional referred cultural prescribing programme.                                    | Individuals with mild to moderate mental health conditions.                                                                                   | Fife, UK                 | N=262 | n=136                                                      |
| NEWCASTLE WEST CLINICAL COMMISSIONING GROUP (2014) | Social Prescribing for Mental Health  | 3- and 9-month follow-up before-after study. Plus four focus groups and two detailed case studies. | To improve general wellbeing and reduce health service use.                                                                                 | Link worker social prescribing programme and a 'light touch' signposting social prescribing programme. | Individuals who have mental health needs alone or in conjunction with a long term condition.                                                  | Newcastle, UK            | N=21  | n=20 quantitative, n=2 case studies, n=unknown qualitative |
| OKIN, R. L., ET AL. (2000)                         | Not listed.                           | 12-month follow-up before-after study.                                                             | To reduce the use of acute hospital services and service cost, and reduce the psychosocial problems of frequent emergency department users. | Psychiatric social-worker facilitated case management programme.                                       | Patients who use an emergency department 5 or more times in 12 months, 18 years or older.                                                     | San Francisco, USA       | N=53  | n=53                                                       |
| RAMSBOTTOM, H., ET AL. (N.D.)                      | The Social Prescribing Pilot Project. | Detailed case descriptions and a retrospective study.                                              | To support people aged 55 and over with their social, emotional and practical needs.                                                        | GP referred social prescribing service                                                                 | Older persons with mild to moderate depression or social isolation/loneliness.                                                                | Yorkshire and Humber, UK | N=117 | n=4 case studies, n=unknown quantitative                   |
| REINIUS, P., ET AL. (2013)                         | Not listed.                           | 1-year follow-up zelen-design randomised control trial.                                            | To improve self-assessed health and reduce health service use among frequent emergency department users.                                    | Telephone-based case management intervention.                                                          | Patients with three or more emergency visits over 6 months, over 18 years of age and without dementia/psychotic diseases or terminal illness. | Stockholm County, Sweden | N=271 | n=211 intervention, n=57 control, n=3 deceased             |

|                                        |                                  |                                     |                                                     |                                                             |                                                                                            |                                                                               |                 |                           |      |
|----------------------------------------|----------------------------------|-------------------------------------|-----------------------------------------------------|-------------------------------------------------------------|--------------------------------------------------------------------------------------------|-------------------------------------------------------------------------------|-----------------|---------------------------|------|
| 1<br>2<br>3<br>4<br>5<br>6<br>7<br>8   | SKINNER, J., ET AL. (2009)       | Not listed.                         | 6-month before-after study.                         | To reduce emergency department visits among frequent users. | Nurse and emergency department specialist facilitated case management programme.           | Patients who visited the emergency department 10 or more times in 6 months.   | Edinburgh, UK   | N=57                      | n=57 |
| 9<br>10<br>11<br>12                    | SOUTH, J., ET AL. (2008)         | Community Health Advice Team        | Semi-structured interview study                     | To broaden health service provision in the community.       | GP or self-referred facilitated social prescribing programme.                              | Not listed.                                                                   | Bradford, UK    | Not listed.               | n=10 |
| 13<br>14<br>15<br>16                   | STICKLEY, T. AND A. HUI (2012)   | Arts on Prescription programme      | Semi-structured interview study.                    | To improve mental health.                                   | Mental health professional referred arts based activity groups.                            | Not listed.                                                                   | Not listed (UK) | N=>400                    | n=16 |
| 17<br>18<br>19<br>20<br>21<br>22       | STICKLEY, T. AND M. EADES (2013) | Art on Prescription Programme       | Average 24 month post-intervention interview study. | To create positive mental health and wellbeing outcomes.    | Mental health professional referred arts based activity groups. (see Stickley & Hui, 2012) | Not listed.                                                                   | Not listed (UK) | (see Stickley & Hui 2012) | n=10 |
| 23<br>24<br>25<br>26<br>27<br>28<br>29 | TADROS, A. S., ET AL. (2012)     | San Diego Resource Access Programme | 15-month both before-after retrospective study      | To reduce emergency medical services and hospital use.      | Emergency services referred, nurse facilitated case management programme.                  | Patients with 10 or more emergency service transports in preceding 12 months. | San Diego USA   | N=51                      | n=51 |

|                                                                                              |                                     |             |                                                                                  |                                         |                                                     |                                                                                                                                                                                                                                                                                           |                   |       |       |
|----------------------------------------------------------------------------------------------|-------------------------------------|-------------|----------------------------------------------------------------------------------|-----------------------------------------|-----------------------------------------------------|-------------------------------------------------------------------------------------------------------------------------------------------------------------------------------------------------------------------------------------------------------------------------------------------|-------------------|-------|-------|
| 1<br>2<br>3<br>4<br>5<br>6<br>7<br>8<br>9<br>10<br>11<br>12<br>13<br>14<br>15<br>16<br>17    | THE CARE FORUM (2015)               | New Routes  | Before-after prospective study                                                   | To improve wellbeing.                   | GP referred, facilitated social prescribing service | Individuals with low/moderate mental health issues, housebound, lack of mobility, physical health problems related to mental health/wellbeing, low income/unemployed, recently redundant, long-term sick, retired, carers, ex-carers, learning disabilities, and other vulnerable adults. | Keynsham, England | N=312 | N=240 |
| 18<br>19<br>20<br>21<br>22<br>23<br>24<br>25<br>26<br>27<br>28<br>29<br>30<br>31<br>32<br>33 | VOGELPOEL, N. AND K. JARROLD (2014) | Not listed. | Detailed case study, interview study, and unspecified length before-after study. | To improve health and social wellbeing. | GP referred cultural social prescribing programme.  | “[Older] people experiencing social isolation and associated health problems who have single or multi-sensory impairment” p.41                                                                                                                                                            | Rotherham, UK     | N=12  | n=12  |

1  
2  
3  
4  
5  
6  
7  
8  
9  
10  
11  
12  
13  
14  
15  
16  
17  
18  
19  
20  
21  
22  
23  
24  
25  
26  
27  
28  
29  
30  
31  
32  
33  
34  
35  
36  
37  
38  
39  
40  
41  
42  
43  
44  
45  
46  
47

1  
2  
3  
4  
5  
6  
7  
8  
9  
10  
11  
12  
13  
14  
15  
16  
17  
18  
19  
20  
21  
22  
23  
24  
25  
26  
27  
28  
29  
30  
31  
32  
33  
34  
35  
36  
37  
38  
39  
40  
41  
42  
43  
44  
45  
46  
47

|                                 |                                                                     |                                                                                                                                                                                     |                                                                                                                                  |                                                                      |                                                                                                                                                                                                                                                                                                       |                                  |       |                                                                              |
|---------------------------------|---------------------------------------------------------------------|-------------------------------------------------------------------------------------------------------------------------------------------------------------------------------------|----------------------------------------------------------------------------------------------------------------------------------|----------------------------------------------------------------------|-------------------------------------------------------------------------------------------------------------------------------------------------------------------------------------------------------------------------------------------------------------------------------------------------------|----------------------------------|-------|------------------------------------------------------------------------------|
| WHITE, KINSELLA, & SOUTH (2010) | Health Trainer and Social Prescribing Service (based on CHAT pilot) | Before-after 9-month prospective study (single item question) and structured interviews.                                                                                            | To support patients with social needs (study aim to examine if patients make more appropriate use of GP practice after referral) | GP referred, facilitated social prescribing service                  | Individuals with mild mental health problems, who are socially isolated, with relationship difficulties, facing problems with finance/housing/employment, carer, parent, struggling with long-term condition or disability, coming to terms with bereavement or wishing to adopt healthier lifestyle. | South and West Bradford, England | N=484 | n=12 interview study, n=484 quantitative study                               |
| WHITE, M. AND E. SALAMON (2010) | Arts for Well-being                                                 | A cross-sectional quantitative and qualitative analysis of feedback forms. Plus qualitative analysis of five focus groups, one participant interview, and two written testimonials. | To improve resilience, confidence, and self-esteem.                                                                              | Community arts for health improvement, social prescribing programme. | Individuals with long term conditions, new parents or carers.                                                                                                                                                                                                                                         | South and West Bradford, England | N=608 | n=22 quantitative, n=42 qualitative (focus groups), n=3 qualitative (other). |

\*FOLLOW-UP TIME INCLUDED WHERE REPORTED.

only

Appendix 2: Programme Aims and Measures

| Reference                      | Individual Level |        |             | Core Aim     |              | Other | No. of aims | Individual & System Aim?* | Stated Aim of SP Programme                              | Measure 1                                                                                  | Measure 2                                                                                                  | Measure 3                                                                                    | Measure 4 | Measure 5 | Measure 6 | Measure 7 | Measure 8 | Measure 9 | Measure 10 | Measure 11 | Measure 12 |  |  |
|--------------------------------|------------------|--------|-------------|--------------|--------------|-------|-------------|---------------------------|---------------------------------------------------------|--------------------------------------------------------------------------------------------|------------------------------------------------------------------------------------------------------------|----------------------------------------------------------------------------------------------|-----------|-----------|-----------|-----------|-----------|-----------|------------|------------|------------|--|--|
|                                | Mental Health    | Social | Service Use | System Level | Service Cost |       |             |                           |                                                         |                                                                                            |                                                                                                            |                                                                                              |           |           |           |           |           |           |            |            |            |  |  |
| Baker, K. and A. Irving (2016) | 1                | 1      |             |              |              |       | 2           | 0                         | To reduce isolation / loneliness and improve wellbeing. | Focus Group with family members who engaged with the service to explore service experience | Semi-structured (informal) interviews with participants to explore service experience and wellbeing impact | Focus groups (informal) with participants to explore service experience and wellbeing impact |           |           |           |           |           |           |            |            |            |  |  |

1  
2  
3  
4  
5  
6  
7  
8  
9  
10  
11  
12  
13  
14  
15  
16  
17  
18  
19  
20  
21  
22  
23  
24  
25  
26  
27  
28  
29  
30  
31  
32  
33  
34  
35  
36  
37  
38  
39  
40  
41  
42  
43  
44  
45  
46  
47

|                                          |   |   |   |   |                                                                                                                                     |                                                                                                                                                   |                                          |                                             |                                                |                                                                                          |                                                                          |                                                                                                                                      |                                               |                      |                                                                                                                                                |                                                                                                                     |                                                                |                          |
|------------------------------------------|---|---|---|---|-------------------------------------------------------------------------------------------------------------------------------------|---------------------------------------------------------------------------------------------------------------------------------------------------|------------------------------------------|---------------------------------------------|------------------------------------------------|------------------------------------------------------------------------------------------|--------------------------------------------------------------------------|--------------------------------------------------------------------------------------------------------------------------------------|-----------------------------------------------|----------------------|------------------------------------------------------------------------------------------------------------------------------------------------|---------------------------------------------------------------------------------------------------------------------|----------------------------------------------------------------|--------------------------|
| Blake<br>man,<br>T., et<br>al.<br>(2014) | 1 | 1 | 1 | 3 | 1                                                                                                                                   | To support<br>the self-<br>management<br>of long-term<br>health<br>conditions,<br>improving<br>health /<br>wellbeing<br>and at a<br>reduced cost. | Anxiety<br>Questionnaire<br>from<br>HADS | Dichotomous<br>blood<br>pressure<br>control | Education<br>Impact<br>Questionnaire<br>(heiQ) | Emotional<br>response<br>item<br>from<br>Brief<br>illness<br>Perception<br>Questionnaire | EuroQoL<br>EQ5-D<br>(generic<br>health<br>related<br>quality<br>of life) | Four<br>Physical and<br>Psychological<br>Wellbeing<br>Health<br>Education<br>Outcome<br>Measures from<br>Medical<br>Illness<br>Study | Incremental<br>cost<br>effectiveness<br>Ratio | Levels of<br>illness | Medication<br>Knowledge<br>and<br>Medication<br>Motivation<br>subscales<br>from the<br>Modified<br>Morisky<br>Medication<br>Adherence<br>Scale | Social<br>capital<br>service<br>use via<br>frequency<br>of contact<br>with<br>primary and<br>outpatient<br>services | Summary<br>of<br>Diabetes<br>SelfCare<br>Activities<br>Measure | UCLA<br>Loneliness Scale |
| Blicke<br>m, C.,<br>et al.<br>(2014)     | 1 | 1 | 2 | 1 | To improve<br>the self-<br>management<br>of long-term<br>health<br>conditions<br>through<br>community<br>support and<br>engagement. | Semi-<br>structured<br>interviews<br>with<br>participants<br>using<br>normal<br>ising<br>process<br>theory                                        |                                          |                                             |                                                |                                                                                          |                                                                          |                                                                                                                                      |                                               |                      |                                                                                                                                                |                                                                                                                     |                                                                |                          |







1  
2  
3  
4  
5  
6  
7  
8  
9  
10  
11  
12  
13  
14  
15  
16  
17  
18  
19  
20  
21  
22  
23  
24  
25  
26  
27  
28  
29  
30  
31  
32  
33  
34  
35  
36  
37  
38  
39  
40  
41  
42  
43  
44  
45  
46  
47

|                                          |   |   |   |   |   |                                                                                                                                                                                                |                                                                           |                                          |                               |                                 |                                                |                                      |                                      |                                     |                                   |                                                   |  |  |  |
|------------------------------------------|---|---|---|---|---|------------------------------------------------------------------------------------------------------------------------------------------------------------------------------------------------|---------------------------------------------------------------------------|------------------------------------------|-------------------------------|---------------------------------|------------------------------------------------|--------------------------------------|--------------------------------------|-------------------------------------|-----------------------------------|---------------------------------------------------|--|--|--|
| Faulkner, M. (2004)                      | 1 | 1 |   | 2 | 0 | To improve the psychosocial state of individuals.                                                                                                                                              | Semi-structured interviews with patients to explore service effectiveness |                                          |                               |                                 |                                                |                                      |                                      |                                     |                                   |                                                   |  |  |  |
| Friedli, Themasl-Huber & Butchart (2012) | 1 | 1 | 1 | 3 | 1 | To improve mental wellbeing, uptake of local services, participation in community activities, social support/contact/networks. And to enhance skills/behaviours that improve mental wellbeing. | Semi-structured (assumed) interviews to explore patient experience.       | Warwick-Edinburgh Mental Wellbeing Scale | Work Social Adjustment Scale  | Reason for Referral             |                                                |                                      |                                      |                                     |                                   |                                                   |  |  |  |
| Garety, P.A., et al. (2006)              | 1 | 1 |   | 2 | 0 | To help individuals retain/recover functional capacity to study or work and/or re-establish supportive social networks.                                                                        | Adverse incidents (administrative)                                        | Calgary Depression Rating Scale          | Global Assessment of Function | Housing Record (administrative) | Manchester Short Assessment of Quality of Life | Positive and Negative Syndrome Scale | Relationship Record (administrative) | Scale for the Assessment of Insight | Verona Service Satisfaction Scale | Vocational or Educational Status (administrative) |  |  |  |

1  
2  
3  
4  
5  
6  
7  
8  
9  
10  
11  
12  
13  
14  
15  
16  
17  
18  
19  
20  
21  
22  
23  
24  
25  
26  
27  
28  
29  
30  
31  
32  
33  
34  
35  
36  
37  
38  
39  
40  
41  
42  
43  
44  
45  
46  
47

|                             |   |   |   |   |   |                                                                                                            |                                                          |                                                            |                                   |                                                  |                                                    |                                                                            |                                                                    |                                  |
|-----------------------------|---|---|---|---|---|------------------------------------------------------------------------------------------------------------|----------------------------------------------------------|------------------------------------------------------------|-----------------------------------|--------------------------------------------------|----------------------------------------------------|----------------------------------------------------------------------------|--------------------------------------------------------------------|----------------------------------|
| Goodhart, C., et al. (1999) | 1 |   |   | 1 | 0 | To support individuals experience social difficulties.                                                     | Referral records (e.g. what activities were referred to) | Semi-structured interviews to explore patient experiences. |                                   |                                                  |                                                    |                                                                            |                                                                    |                                  |
| Grant, C., et al. (2000)    | 1 | 1 |   | 2 | 1 | To improve patient quality of life and provide better management of psychosocial problems in primary care. | Cost Analysis                                            | Dartmouth-COOP/WONCA Functional Health Assessment Chart    | Delighted-terrible Faces Scale    | Duke-UNC Functional Social Support Questionnaire | Hospital Anxiety and Depression Scale              |                                                                            |                                                                    |                                  |
| Grayer, J., et al. (2008)   | 1 | 1 | 1 | 3 | 1 | To improve patient psychosocial wellbeing and to reduce primary care service use.                          | Client Satisfaction questionnaire                        | Clinical Outcomes in Routine Evaluation - Outcomes Measure | Community Link Evaluation (novel) | General Health Questionnaire-12                  | Number of Specialist MH Referrals (administrative) | Number of GP visits (including for psychosocial problems) (administrative) | Number of Prescriptions for Psychological Reasons (administrative) | Work and Social Adjustment Scale |

1  
2  
3  
4  
5  
6  
7  
8  
9  
10  
11  
12  
13  
14  
15  
16  
17  
18  
19  
20  
21  
22  
23  
24  
25  
26  
27  
28  
29  
30  
31  
32  
33  
34  
35  
36  
37  
38  
39  
40  
41  
42  
43  
44  
45  
46  
47

|                                     |   |   |   |  |  |   |   |                                                                                 |                                                                      |                                            |                                                                                  |                                         |                                                                      |                     |                                       |
|-------------------------------------|---|---|---|--|--|---|---|---------------------------------------------------------------------------------|----------------------------------------------------------------------|--------------------------------------------|----------------------------------------------------------------------------------|-----------------------------------------|----------------------------------------------------------------------|---------------------|---------------------------------------|
| Greaves, C. J. and L. Farbus (2006) | 1 | 1 | 1 |  |  | 3 | 0 | To improve physical and psychosocial health through active social contact.      | Focus group with patients to explore patient outcomes                | Geriatric Depression scale                 | MOS Social Support Survey (altered)                                              | Participant Demographics                | Semi-structured interviews with patients to explore patient outcomes | Short form 12 Scale | Health and Social Care Usage (survey) |
| Gupta, K., et al. (1996)            | 1 |   |   |  |  | 1 | 0 | To reduce hospital care use among elderly people and promote independent living | Hospital Admissions Length (administrative)                          | Hospital Admission Number (administrative) | Quality of Care Questionnaire                                                    | Hospital Bed Occupancy (administrative) |                                                                      |                     |                                       |
| Hudon, C., et al. (2015)            | 1 |   |   |  |  | 1 | 0 | To optimise health care coordination and reduce health service use.             | Focus groups with families of patients to explore service experience |                                            | Semi-structured, in-depth interviews with patients to explore service experience |                                         |                                                                      |                     |                                       |

1  
2  
3  
4  
5  
6  
7  
8  
9  
10  
11  
12  
13  
14  
15  
16  
17  
18  
19  
20  
21  
22  
23  
24  
25  
26  
27  
28  
29  
30  
31  
32  
33  
34  
35  
36  
37  
38  
39  
40  
41  
42  
43  
44  
45  
46  
47

|                   |   |   |   |   |                                                                                                                                                                                                                                                                                                                                                                                                                                 |                                            |                                                              |                                      |                                  |                       |                               |                                     |
|-------------------|---|---|---|---|---------------------------------------------------------------------------------------------------------------------------------------------------------------------------------------------------------------------------------------------------------------------------------------------------------------------------------------------------------------------------------------------------------------------------------|--------------------------------------------|--------------------------------------------------------------|--------------------------------------|----------------------------------|-----------------------|-------------------------------|-------------------------------------|
| Huxley, P. (1997) | 1 | 1 | 2 | 1 | To increase the level of mental well-being of participants using a wide range of creative processes'. Other aims to provide arts opportunities, recommend appropriate arts activities, raise self-esteem/self-confidence, to 'encourage individuals to look after their own health by developing skills in self-assessment and making choices' and to 'encourage participants to take up further arts/leisure activities'. Pg 5 | Activities, interests and hobbies question | Contact with other health professionals in the last 3 months | Contact with GP in the last 3 months | General Health Questionnaire -12 | Self-concept question | Social relationships question | Unknown qualitative response method |
|-------------------|---|---|---|---|---------------------------------------------------------------------------------------------------------------------------------------------------------------------------------------------------------------------------------------------------------------------------------------------------------------------------------------------------------------------------------------------------------------------------------|--------------------------------------------|--------------------------------------------------------------|--------------------------------------|----------------------------------|-----------------------|-------------------------------|-------------------------------------|

1  
2  
3  
4  
5  
6  
7  
8  
9  
10  
11  
12  
13  
14  
15  
16  
17  
18  
19  
20  
21  
22  
23  
24  
25  
26  
27  
28  
29  
30  
31  
32  
33  
34  
35  
36  
37  
38  
39  
40  
41  
42  
43  
44  
45  
46  
47

|                                                                     |   |   |   |   |   |   |                                                                                                                     |                                                      |                                                                       |                                                  |                                    |                         |                             |                                                         |                                                |
|---------------------------------------------------------------------|---|---|---|---|---|---|---------------------------------------------------------------------------------------------------------------------|------------------------------------------------------|-----------------------------------------------------------------------|--------------------------------------------------|------------------------------------|-------------------------|-----------------------------|---------------------------------------------------------|------------------------------------------------|
| Innovation Unit (2016)                                              | 1 | 1 | 1 | 1 | 4 | 1 | To improve health and wellbeing and reduce primary / acute care use through connections to community-based support. | Health Service Data Counts (administrative)          | Semi-structured interviews with clients to explore service experience | Short case description of participant experience |                                    |                         |                             |                                                         |                                                |
| Innovation Unit and Greater Manchester Public Health Network (2016) |   |   |   |   |   |   | Not Listed.                                                                                                         | Interviews with practitioners about patient progress | Warwick-Edinburgh Mental Wellbeing Scale                              |                                                  |                                    |                         |                             |                                                         |                                                |
| Jones, M., et al. (2013)                                            | 1 | 1 | 1 |   | 3 | 0 | To improve physical and mental health and social wellbeing.                                                         | Centre for Epidemiological Studies Depression Scale  | Demographic questions                                                 | General Health Likert Scale                      | GP Physical Activity Questionnaire | Health Eating Questions | Life satisfaction Questions | Social Wellbeing Scale (European Social Survey Round 3) | Warwick Edinburgh Mental Wellbeing Short Scale |

1  
2  
3  
4  
5  
6  
7  
8  
9  
10  
11  
12  
13  
14  
15  
16  
17  
18  
19  
20  
21  
22  
23  
24  
25  
26  
27  
28  
29  
30  
31  
32  
33  
34  
35  
36  
37  
38  
39  
40  
41  
42  
43  
44  
45  
46  
47

|                                    |   |   |                                             |   |   |                                                                                                                                                                                     |                                                        |                                                  |                                          |                                                         |                                             |                              |                       |                                      |
|------------------------------------|---|---|---------------------------------------------|---|---|-------------------------------------------------------------------------------------------------------------------------------------------------------------------------------------|--------------------------------------------------------|--------------------------------------------------|------------------------------------------|---------------------------------------------------------|---------------------------------------------|------------------------------|-----------------------|--------------------------------------|
| Kilroy, A., et al. (2007)          | 1 | 1 | 1 (Community Wellbeing and Quality of Life) | 3 | 1 | (Various programmes) To empower/support individuals to choose a healthier lifestyle. And to create a sense of well-being/transform quality of life for communities and individuals. | General Health Questionnaire -12                       | Hospital Anxiety and Depression Scale            | Ryff's Scale of Psychological Well Being | Semi-structured interviews about participant experience | Warr, Cook & Wall and Life Attitudes Survey |                              |                       |                                      |
| Kimberlee, R., et al. (2014)       | 1 | 1 | 1                                           | 3 | 1 | To improve wellbeing (mental, spiritual and physical) and reduce health service cost.                                                                                               | Friendship Scale for Isolation                         | GAD7 Anxiety Scale                               | GP Visit Rate (administrative)           | International Physical Activity Questionnaire           | ONS Wellbeing Measures                      | Perceived Economic Wellbeing | PHQ9 Depression Scale | Social Return on Investment Analysis |
| Lee, K.-H. and L. Davenport (2006) | 1 | 1 |                                             | 2 | 1 | To reduce the number of emergency department visits and improve patient health.                                                                                                     | Emergency Department Number of Visits (administrative) |                                                  |                                          |                                                         |                                             |                              |                       |                                      |
| Liao, M.-C., et al. (2012)         | 1 | 1 |                                             | 2 | 1 | To reduce emergency department use and improve health through targeted care.                                                                                                        | Emergency department use (administrative)              | Short case description of participant experience |                                          |                                                         |                                             |                              |                       |                                      |

|                                                                                        |                                                    |   |   |                        |   |   |                                                                                        |                             |                                                                                                                 |                                           |                    |
|----------------------------------------------------------------------------------------|----------------------------------------------------|---|---|------------------------|---|---|----------------------------------------------------------------------------------------|-----------------------------|-----------------------------------------------------------------------------------------------------------------|-------------------------------------------|--------------------|
| 1<br>2<br>3<br>4<br>5<br>6<br>7<br>8<br>9<br>10<br>11<br>12                            | Maughan, D. L., et al. (2016)                      | 1 | 1 | 1 (Environmental Cost) | 2 | 0 | To reduce healthcare service use and the subsequent financial and environmental costs. | Cost analysis               | Number of GP Appointments (administrative)                                                                      | Prescription (psychotropic)               | Secondary Referral |
| 13<br>14<br>15<br>16<br>17<br>18<br>19                                                 | Morton, L., et al. (2015)                          | 1 |   |                        | 1 | 0 | To improve mental wellbeing.                                                           | General Self-efficacy Scale | Hospital Anxiety and Depression Scale                                                                           | Warwick-Edinburgh Mental Well-being Scale |                    |
| 20<br>21<br>22<br>23<br>24<br>25<br>26<br>27<br>28<br>29<br>30<br>31<br>32<br>33<br>34 | Newcastle West Clinical Commissioning Group (2014) | 1 | 1 |                        | 2 | 1 | To improve general wellbeing and reduce health service use.                            | Cost Analysis               | Focus Groups with potential or previous patients to explore perceptions and expectations of social prescription |                                           |                    |

1  
2  
3  
4  
5  
6  
7  
8  
9  
10  
11  
12  
13  
14  
15  
16  
17  
18  
19  
20  
21  
22  
23  
24  
25  
26  
27  
28  
29  
30  
31  
32  
33  
34  
35  
36  
37  
38  
39  
40  
41  
42  
43  
44  
45  
46  
47





1  
2  
3  
4  
5  
6  
7  
8  
9  
10  
11  
12  
13  
14  
15  
16  
17  
18  
19  
20  
21  
22  
23  
24  
25  
26  
27  
28  
29  
30  
31  
32  
33  
34  
35  
36  
37  
38  
39  
40  
41  
42  
43  
44  
45  
46  
47

|                                                        |          |  |          |          |                                                                                        |                                                                                                                                                                                                                                                                                                                |
|--------------------------------------------------------|----------|--|----------|----------|----------------------------------------------------------------------------------------|----------------------------------------------------------------------------------------------------------------------------------------------------------------------------------------------------------------------------------------------------------------------------------------------------------------|
| <p>Skinne<br/>r, J., et<br/>al.<br/>(2009)</p>         | <p>1</p> |  | <p>1</p> | <p>0</p> | <p>To reduce<br/>emergency<br/>department<br/>visits among<br/>frequent<br/>users.</p> | <p>Numbe<br/>r of<br/>Emerg<br/>ency<br/>Depart<br/>ment<br/>Admiss<br/>ions<br/>(admin<br/>istrativ<br/>e)<br/><br/>Unspec<br/>ified<br/>case<br/>records<br/>(referra<br/>l type)<br/>(admini<br/>strative<br/>)<br/><br/>Unspec<br/>ified<br/>diagno<br/>stic<br/>detail<br/>(admin<br/>istrativ<br/>e)</p> |
| <p>South,<br/>J., et<br/>al.<br/>(2008)</p>            | <p>1</p> |  | <p>1</p> | <p>0</p> | <p>To broaden<br/>health<br/>service<br/>provision in<br/>the<br/>community.</p>       | <p>Short<br/>case<br/>descrip<br/>tion of<br/>particip<br/>ant<br/>experie<br/>nce<br/>based<br/>on<br/>interview.<br/><br/>Semi-<br/>structur<br/>ed, in-<br/>depth<br/>interviews<br/>with<br/>patients<br/>using<br/>Narrati<br/>ve<br/>Inquiry<br/>Process</p>                                             |
| <p>Stickle<br/>y, T.<br/>and A.<br/>Hui<br/>(2012)</p> | <p>1</p> |  | <p>1</p> | <p>0</p> | <p>To improve<br/>mental<br/>health.</p>                                               | <p>Semi-<br/>structur<br/>ed, in-<br/>depth<br/>interviews<br/>with<br/>patients<br/>using<br/>Narrati<br/>ve<br/>Inquiry<br/>Process</p>                                                                                                                                                                      |

1  
2  
3  
4  
5  
6  
7  
8  
9  
10  
11  
12  
13  
14  
15  
16  
17  
18  
19  
20  
21  
22  
23  
24  
25  
26  
27  
28  
29  
30  
31  
32  
33  
34  
35  
36  
37  
38  
39  
40  
41  
42  
43  
44  
45  
46  
47

|                                               |   |   |   |   |                                                                         |                                                                                                                                                                                                                                                                                                                                                                                                                                                                                            |
|-----------------------------------------------|---|---|---|---|-------------------------------------------------------------------------|--------------------------------------------------------------------------------------------------------------------------------------------------------------------------------------------------------------------------------------------------------------------------------------------------------------------------------------------------------------------------------------------------------------------------------------------------------------------------------------------|
| Stickle<br>y, T.<br>and M.<br>Eades<br>(2013) | 1 | 1 | 2 | 0 | To create<br>positive<br>mental health<br>and<br>wellbeing<br>outcomes. | Semi-<br>structur<br>ed<br>Intervi<br>ew<br>with<br>particip<br>ants to<br>explore<br>particip<br>ant<br>experie<br>nce                                                                                                                                                                                                                                                                                                                                                                    |
| Tadros<br>, A. S.,<br>et al.<br>(2012)        | 1 |   | 1 | 0 | To reduce<br>emergency<br>medical<br>services and<br>hospital use.      | EMS<br>Dispatc<br>h<br>Respon<br>se and<br>Transp<br>ort<br>Codes<br><br>EMS<br>Presenc<br>e of<br>Comor<br>bidities<br>(admin<br>istrativ<br>)<br><br>Most<br>commo<br>n<br>health<br>complai<br>nt for<br>enrolle<br>d<br>partici<br>pants<br>(admin<br>istrativ<br>e)<br><br>Resour<br>ce<br>Access<br>Progra<br>mme<br>Record<br>ed<br>Activit<br>y<br>(admin<br>istrativ<br>e)<br><br>Time<br>and<br>Cost of<br>Health<br>Care<br>Resour<br>ce Use<br>(admin<br>istrativ<br>e)        |
| The<br>Care<br>Forum<br>(2015)                | 1 |   | 1 | 0 | To improve<br>wellbeing.                                                | Demog<br>raphics<br>Analys<br>is<br><br>Detaile<br>d Case<br>Studies<br><br>Five<br>Ways<br>to<br>Wellbe<br>ing<br><br>Make<br>Yourse<br>lf<br>Medica<br>l<br>Outco<br>me<br>Profile<br><br>Numbe<br>r of<br>Activit<br>ies<br>Undert<br>aken<br><br>Reason<br>for<br>referral<br><br>Warwi<br>ck-<br>Edinbu<br>rgh<br>Mental<br>Wellbe<br>ing<br>Scale<br><br>Well<br>being<br>Outc<br>omes<br>Star<br><br>Referr<br>ed<br>Activi<br>ty<br><br>Total<br>numbe<br>r of GP<br>referral<br>s |

1  
2  
3  
4  
5  
6  
7  
8  
9  
10  
11  
12  
13  
14  
15  
16  
17  
18  
19  
20  
21  
22  
23  
24  
25  
26  
27  
28  
29  
30  
31  
32  
33  
34  
35  
36  
37  
38  
39  
40  
41  
42  
43  
44  
45  
46  
47

|                                            |            |  |  |            |  |                                                                                                                                                                                |                                                                                            |                                                                              |                                                                                     |                                                                                |                                 |
|--------------------------------------------|------------|--|--|------------|--|--------------------------------------------------------------------------------------------------------------------------------------------------------------------------------|--------------------------------------------------------------------------------------------|------------------------------------------------------------------------------|-------------------------------------------------------------------------------------|--------------------------------------------------------------------------------|---------------------------------|
| <p>Vogelpoel, N. and K. Jarrold (2014)</p> | <p>1 1</p> |  |  | <p>2 0</p> |  | <p>To improve health and social wellbeing.</p>                                                                                                                                 | <p>Detailed case studies to explore participant experience (Dynamic Observation scale)</p> | <p>Warwick-Edinburgh Mental Wellbeing Scale (14 and 7 item)</p>              |                                                                                     |                                                                                |                                 |
| <p>White, Kinsella, &amp; South (2010)</p> | <p>1 1</p> |  |  | <p>2 1</p> |  | <p>To support patients with social needs (Study Aim to examine if patients make more appropriate use of GP practice after referral, unclear if this is also programme aim)</p> | <p>Detailed Case Studies</p>                                                               | <p>Single-item question on whether patients made progress on their goals</p> | <p>Structured telephone interview about patient views on service.</p>               |                                                                                |                                 |
| <p>White, M. and E. Salamon (2010)</p>     | <p>1 1</p> |  |  | <p>2 0</p> |  | <p>To improve resilience, confidence, and self-esteem.</p>                                                                                                                     | <p>Content analysis of participant evaluation forms</p>                                    | <p>Review of participant demographic characteristics</p>                     | <p>Semi-structured participant focus groups to explore participant experiences.</p> | <p>Semi-structured telephone interviews to explore participant experience.</p> | <p>Two written testimonials</p> |

1  
2  
3  
4  
5  
6  
7  
8  
9  
10  
11  
12  
13  
14  
15  
16  
17  
18  
19  
20  
21  
22  
23  
24  
25  
26  
27  
28  
29  
30  
31  
32  
33  
34  
35  
36  
37  
38  
39  
40  
41  
42  
43  
44  
45  
46  
47

---

|                                 |   |   |    |   |   |   |  |    |
|---------------------------------|---|---|----|---|---|---|--|----|
| Total Number of Articles by Aim | 2 | 1 | 21 | 2 | 6 | 4 |  | 19 |
|---------------------------------|---|---|----|---|---|---|--|----|

---

\*Where 1 indicates the study aimed to address both a system and individual level aim.

---

For peer review only

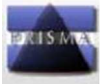

# PRISMA 2009 Checklist

1  
2  
3  
4  
5  
6  
7  
8  
9  
10  
11  
12  
13  
14  
15  
16  
17  
18  
19  
20  
21  
22  
23  
24  
25  
26  
27  
28  
29  
30  
31  
32  
33  
34  
35  
36  
37  
38  
39  
40  
41  
42  
43  
44  
45  
46  
47  
48  
49

| Section/topic                      | #  | Checklist item                                                                                                                                                                                                                                                                                              | Reported on page #      |
|------------------------------------|----|-------------------------------------------------------------------------------------------------------------------------------------------------------------------------------------------------------------------------------------------------------------------------------------------------------------|-------------------------|
| <b>TITLE</b>                       |    |                                                                                                                                                                                                                                                                                                             |                         |
| Title                              | 1  | Identify the report as a systematic review, meta-analysis, or both.                                                                                                                                                                                                                                         |                         |
| <b>ABSTRACT</b>                    |    |                                                                                                                                                                                                                                                                                                             |                         |
| Structured summary                 | 2  | Provide a structured summary including, as applicable: background; objectives; data sources; study eligibility criteria, participants, and interventions; study appraisal and synthesis methods; results; limitations; conclusions and implications of key findings; systematic review registration number. | 2                       |
| <b>INTRODUCTION</b>                |    |                                                                                                                                                                                                                                                                                                             |                         |
| Rationale                          | 3  | Describe the rationale for the review in the context of what is already known.                                                                                                                                                                                                                              | 4-5                     |
| Objectives                         | 4  | Provide an explicit statement of questions being addressed with reference to participants, interventions, comparisons, outcomes, and study design (PICOS).                                                                                                                                                  | 4-5                     |
| <b>METHODS</b>                     |    |                                                                                                                                                                                                                                                                                                             |                         |
| Protocol and registration          | 5  | Indicate if a review protocol exists, if and where it can be accessed (e.g., Web address), and, if available, provide registration information including registration number.                                                                                                                               | n/a                     |
| Eligibility criteria               | 6  | Specify study characteristics (e.g., PICOS, length of follow-up) and report characteristics (e.g., years considered, language, publication status) used as criteria for eligibility, giving rationale.                                                                                                      | <u>5-7</u> <del>6</del> |
| Information sources                | 7  | Describe all information sources (e.g., databases with dates of coverage, contact with study authors to identify additional studies) in the search and date last searched.                                                                                                                                  | <u>5-7</u> <del>6</del> |
| Search                             | 8  | Present full electronic search strategy for at least one database, including any limits used, such that it could be repeated.                                                                                                                                                                               | <u>5-7</u> <del>6</del> |
| Study selection                    | 9  | State the process for selecting studies (i.e., screening, eligibility, included in systematic review, and, if applicable, included in the meta-analysis).                                                                                                                                                   | <u>6</u> <del>5-7</del> |
| Data collection process            | 10 | Describe method of data extraction from reports (e.g., piloted forms, independently, in duplicate) and any processes for obtaining and confirming data from investigators.                                                                                                                                  | <u>5-7</u> <del>6</del> |
| Data items                         | 11 | List and define all variables for which data were sought (e.g., PICOS, funding sources) and any assumptions and simplifications made.                                                                                                                                                                       | <u>6</u> <del>5-7</del> |
| Risk of bias in individual studies | 12 | Describe methods used for assessing risk of bias of individual studies (including specification of whether this was done at the study or outcome level), and how this information is to be used in any data synthesis.                                                                                      | n/a                     |
| Summary measures                   | 13 | State the principal summary measures (e.g., risk ratio, difference in means).                                                                                                                                                                                                                               | n/a                     |
| Synthesis of results               | 14 | Describe the methods of handling data and combining results of studies, if done, including measures of consistency (e.g., $I^2$ for each meta-analysis).                                                                                                                                                    | <u>6</u> <del>5-7</del> |

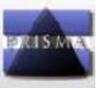

# PRISMA 2009 Checklist

1  
2  
3  
4  
5  
6  
7  
8  
9  
10  
11  
12  
13  
14  
15  
16  
17  
18  
19  
20  
21  
22  
23  
24  
25  
26  
27  
28  
29  
30  
31  
32  
33  
34  
35  
36  
37  
38  
39  
40  
41  
42  
43  
44  
45  
46  
47  
48  
49

| Section/topic                 | #  | Checklist item                                                                                                                                                                                           | Reported on page #                       |
|-------------------------------|----|----------------------------------------------------------------------------------------------------------------------------------------------------------------------------------------------------------|------------------------------------------|
| Risk of bias across studies   | 15 | Specify any assessment of risk of bias that may affect the cumulative evidence (e.g., publication bias, selective reporting within studies).                                                             | n/a                                      |
| Additional analyses           | 16 | Describe methods of additional analyses (e.g., sensitivity or subgroup analyses, meta-regression), if done, indicating which were pre-specified.                                                         | n/a                                      |
| <b>RESULTS</b>                |    |                                                                                                                                                                                                          |                                          |
| Study selection               | 17 | Give numbers of studies screened, assessed for eligibility, and included in the review, with reasons for exclusions at each stage, ideally with a flow diagram.                                          | <del>7-8</del>                           |
| Study characteristics         | 18 | For each study, present characteristics for which data were extracted (e.g., study size, PICOS, follow-up period) and provide the citations.                                                             | <del>7-12</del> /suppl. Appendix 1 and 2 |
| Risk of bias within studies   | 19 | Present data on risk of bias of each study and, if available, any outcome level assessment (see item 12).                                                                                                | n/a                                      |
| Results of individual studies | 20 | For all outcomes considered (benefits or harms), present, for each study: (a) simple summary data for each intervention group (b) effect estimates and confidence intervals, ideally with a forest plot. | <del>7-12</del> /suppl. Appendix 1 and 2 |
| Synthesis of results          | 21 | Present results of each meta-analysis done, including confidence intervals and measures of consistency.                                                                                                  | n/a                                      |
| Risk of bias across studies   | 22 | Present results of any assessment of risk of bias across studies (see Item 15).                                                                                                                          | n/a                                      |
| Additional analysis           | 23 | Give results of additional analyses, if done (e.g., sensitivity or subgroup analyses, meta-regression [see Item 16]).                                                                                    | n/a                                      |
| <b>DISCUSSION</b>             |    |                                                                                                                                                                                                          |                                          |
| Summary of evidence           | 24 | Summarize the main findings including the strength of evidence for each main outcome; consider their relevance to key groups (e.g., healthcare providers, users, and policy makers).                     | <del>14</del> 3-16                       |
| Limitations                   | 25 | Discuss limitations at study and outcome level (e.g., risk of bias), and at review-level (e.g., incomplete retrieval of identified research, reporting bias).                                            | 16                                       |
| Conclusions                   | 26 | Provide a general interpretation of the results in the context of other evidence, and implications for future research.                                                                                  | <del>16</del> 3-176                      |
| <b>FUNDING</b>                |    |                                                                                                                                                                                                          |                                          |
| Funding                       | 27 | Describe sources of funding for the systematic review and other support (e.g., supply of data); role of funders for the systematic review.                                                               | 18                                       |

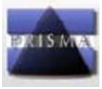

# PRISMA 2009 Checklist

1  
2  
3  
4  
5  
6  
7  
8  
9  
10  
11  
12  
13  
14  
15  
16  
17  
18  
19  
20  
21  
22  
23  
24  
25  
26  
27  
28  
29  
30  
31  
32  
33  
34  
35  
36  
37  
38  
39  
40  
41  
42  
43  
44  
45  
46  
47  
48  
49

doi:10.1371/journal.pmed1000097

For more information, visit: [www.prisma-statement.org](http://www.prisma-statement.org).

Page 2 of 2

For peer review only
