# Supplementary material for: Preparing the prescription: a review of the aim and measurement of social referral programmes
Source: PubMed Central journal article supplement — BMJ Open. 2017 Oct 12;7(10):e017734. doi: 10.1136/bmjopen-2017-017734 (PMC5652530; doi:10.1136/bmjopen-2017-017734), 2017-10-12
Supplement: bmjopen-2017-017734supp001.pdf [file bmjopen-2017-017734supp001.pdf]

## **Supplementary File 1: Search strategy**

### **Example Database Search Terms: PubMed\***

- 1- ("social prescribing"[All Fields] OR "social prescribing services"[All Fields] OR "social prescription"[All Fields] OR "social prescriptions"[All Fields]) OR ("community referrals"[All Fields] OR "community referred"[All Fields] OR "community referred patients"[All Fields] OR "community referring physicians"[All Fields] OR "community refers"[All Fields])

\*No other restrictions were applied, for example there were no date or article type restrictions.

### **Other databases searched:**

SCOPUS, Web of Science, NICE Evidence Guidelines, Google, and PsycNET.
