# Supplementary material for: Preparing the prescription: a review of the aim and measurement of social referral programmes
Source: PubMed Central journal article supplement — BMJ Open. 2017 Oct 12;7(10):e017734. doi: 10.1136/bmjopen-2017-017734 (PMC5652530; doi:10.1136/bmjopen-2017-017734), 2017-10-12
Supplement: bmjopen-2017-017734supp003.pdf [file bmjopen-2017-017734supp003.pdf]

|                                                                                    |   |   |   |   |                                 |   |   |                                                                                                                                                                                        |                                        |                                          |                                     |                                       |                                                      |                                     |                                     |                                            |                                   |                                                                        |                                                     |                                           |
|------------------------------------------------------------------------------------|---|---|---|---|---------------------------------|---|---|----------------------------------------------------------------------------------------------------------------------------------------------------------------------------------------|----------------------------------------|------------------------------------------|-------------------------------------|---------------------------------------|------------------------------------------------------|-------------------------------------|-------------------------------------|--------------------------------------------|-----------------------------------|------------------------------------------------------------------------|-----------------------------------------------------|-------------------------------------------|
| Bragg, R., et al. (2013)                                                           | 1 | 1 | 1 |   | 1 (Environmental Connectedness) | 3 | 0 | To improve psychological health and wellbeing (confidence, self-esteem, physical and mental health), social inclusion and connection to nature                                         | Community Activity involvement (novel) | Connectedness to Nature Scale (novel)    | Environmental Behavior Likert Scale | Health Eating (novel)                 | Neighborhood Belonging (from CLES)                   | Neighborhood satisfaction (novel)   | Perceived Health Scale (novel)      | Perceived Positivity Scale                 | Profile of Mood States            | Rosenberg Self Esteem Scale                                            | Social engagement and Support measure (CLES module) | Warwick-Edinburgh Mental Well-being Scale |
| City and Hackney Clinical Commissioning Group and University of East London (2014) | 1 | 1 | 1 | 1 |                                 | 4 | 1 | To reduce social isolation, better manage long-term conditions, improve health/well-being, increase take-up of community activities and support individuals to visit GP/hospital less. | A&E Attendances (administrative)       | Cost Analysis of Delivering Intervention | General Health Score                | Hospital Anxiety and Depression Scale | Number of regular activities                         | Quality of life (EQ5D)              | Questionnaire                       | Consultation Rates (administrative)        | Self-reported past week wellbeing | Semi-structured interviews with patients to explore service experience | Social Integration Score                            |                                           |
| Cohen, G. D., et al. (2006)                                                        | 1 | 1 | 1 |   |                                 | 3 | 0 | To improve physical and mental health and social engagement.                                                                                                                           | Geriatric Depression Scale Short Form  | Loneliness Scale III                     | Number of falls (Self-report)       | Number of GP visits (self-report)     | Number of Over-the-counter medications (self-report) | Other health problems (Self-report) | Overall health rating (self-report) | Philadelphia Geriatric Center Morale Scale | Social Activity Inventory         |                                                                        |                                                     |                                           |

|                                     |   |   |   |   |   |   |                                                                                                                                                    |                                                                   |                                                                        |                                                              |                                              |                                     |                                                                            |                                   |                                                     |                                  |                                                            |
|-------------------------------------|---|---|---|---|---|---|----------------------------------------------------------------------------------------------------------------------------------------------------|-------------------------------------------------------------------|------------------------------------------------------------------------|--------------------------------------------------------------|----------------------------------------------|-------------------------------------|----------------------------------------------------------------------------|-----------------------------------|-----------------------------------------------------|----------------------------------|------------------------------------------------------------|
| Crawford, M., et al. (2007)         | 1 | 1 | 1 |   | 3 | 1 | To improve service use, address psychosocial needs and decrease the risk for social exclusion for individuals with personality disorder.           | Care Pathway Record                                               | Current use of alcohol or illicit drugs                                | Focus Groups with service users exploring service experience | Four-item Patient Satisfaction Questionnaire | Mental Health Inventory             | Semi-structured interviews with service users exploring service experience | Service utilisation questionnaire | Single-item question exploring motivation to change | Social Functioning Questionnaire | Standardised Assessment of Personality – Abbreviated Scale |
| Dayson, C. and N. Bashir (2014)     | 1 | 1 | 1 | 1 | 4 | 1 | To improve health and social outcomes of individuals with long term conditions and to reduce the use of NHS services to decrease cost.             | Case Study Interviews with beneficiaries to explore social impact | Cost-Benefit Analysis                                                  | Hospital Episode Statistics (administrative)                 | Social ROI Analysis                          | Unspecified wellbeing outcomes tool |                                                                            |                                   |                                                     |                                  |                                                            |
| ERS Research and Consultancy (2013) | 1 | 1 | 1 | 1 | 5 | 1 | To improve the physical, mental and social wellbeing of individuals managing long-term conditions and to reduce health service use to reduce cost. | Trends in Social Prescribing Referrals                            | Semi-structured interviews with patients to explore service experience | Warwick-Edinburgh Mental Well-being Scale Short Form         | Confidence Scale                             |                                     |                                                                            |                                   |                                                     |                                  |                                                            |

|                                          |   |   |   |  |   |   |                                                                                                                                                                                                |                                                                           |                                                      |                               |                                 |                                                |                                      |                                      |                                     |                                   |                                                   |  |  |
|------------------------------------------|---|---|---|--|---|---|------------------------------------------------------------------------------------------------------------------------------------------------------------------------------------------------|---------------------------------------------------------------------------|------------------------------------------------------|-------------------------------|---------------------------------|------------------------------------------------|--------------------------------------|--------------------------------------|-------------------------------------|-----------------------------------|---------------------------------------------------|--|--|
| Faulkner, M. (2004)                      | 1 | 1 |   |  | 2 | 0 | To improve the psychosocial state of individuals.                                                                                                                                              | Semi-structured interviews with patients to explore service effectiveness |                                                      |                               |                                 |                                                |                                      |                                      |                                     |                                   |                                                   |  |  |
| Friedli, Themeßl-Huber & Butchart (2012) | 1 | 1 | 1 |  | 3 | 1 | To improve mental wellbeing, uptake of local services, participation in community activities, social support/contact/networks. And to enhance skills/behaviours that improve mental wellbeing. | Semi-structured (assumed) interviews to explore patient experience.       | Warwick-Edinburgh Mental Wellbeing Scale Short Scale | Work Social Adjustment Scale  | Reason for Referral             |                                                |                                      |                                      |                                     |                                   |                                                   |  |  |
| Garety, P.A., et al. (2006)              | 1 | 1 |   |  | 2 | 0 | To help individuals retain/recover functional capacity to study or work and/or re-establish supportive social networks.                                                                        | Adverse incidents (administrative)                                        | Calgary Depression Rating Scale                      | Global Assessment of Function | Housing Record (administrative) | Manchester Short Assessment of Quality of Life | Positive and Negative Syndrome Scale | Relationship Record (administrative) | Scale for the Assessment of Insight | Verona Service Satisfaction Scale | Vocational or Educational Status (administrative) |  |  |

|                             |   |   |   |   |   |                                                                                                            |                                                          |                                                                    |                                   |                                                  |                                                    |                                                                            |                                                                    |                                  |
|-----------------------------|---|---|---|---|---|------------------------------------------------------------------------------------------------------------|----------------------------------------------------------|--------------------------------------------------------------------|-----------------------------------|--------------------------------------------------|----------------------------------------------------|----------------------------------------------------------------------------|--------------------------------------------------------------------|----------------------------------|
| Goodhart, C., et al. (1999) | 1 |   |   | 1 | 0 | To support individuals experience social difficulties.                                                     | Referral records (e.g. what activities were referred to) | Semi-structured interviews to explore patient experiences.         |                                   |                                                  |                                                    |                                                                            |                                                                    |                                  |
| Grant, C., et al. (2000)    | 1 | 1 |   | 2 | 1 | To improve patient quality of life and provide better management of psychosocial problems in primary care. | Cost Analysis                                            | Dartmouth-COOP/WONCA Functional Health Assessment Chart            | Delighted-terrible Faces Scale    | Duke-UNC Functional Social Support Questionnaire | Hospital Anxiety and Depression Scale              |                                                                            |                                                                    |                                  |
| Grayer, J., et al. (2008)   | 1 | 1 | 1 | 3 | 1 | To improve patient psychosocial wellbeing and to reduce primary care service use.                          | Client Satisfaction questionnaire                        | Clinical Outcomes in Routine Evaluation - Outcomes Measure (novel) | Community Link Evaluation (novel) | General Health Questionnaire-12                  | Number of Specialist MH Referrals (administrative) | Number of GP visits (including for psychosocial problems) (administrative) | Number of Prescriptions for Psychological Reasons (administrative) | Work and Social Adjustment Scale |

|                                     |   |   |   |  |   |   |                                                                                 |                                                                      |                                                                                  |                                     |                                         |                                                                      |                     |                                       |
|-------------------------------------|---|---|---|--|---|---|---------------------------------------------------------------------------------|----------------------------------------------------------------------|----------------------------------------------------------------------------------|-------------------------------------|-----------------------------------------|----------------------------------------------------------------------|---------------------|---------------------------------------|
| Greaves, C. J. and L. Farbus (2006) | 1 | 1 | 1 |  | 3 | 0 | To improve physical and psychosocial health through active social contact.      | Focus group with patients to explore patient outcomes                | Geriatric Depression scale                                                       | MOS Social Support Survey (altered) | Participant Demographics                | Semi-structured interviews with patients to explore patient outcomes | Short form 12 Scale | Health and Social Care Usage (survey) |
| Gupta, K., et al. (1996)            | 1 |   |   |  | 1 | 0 | To reduce hospital care use among elderly people and promote independent living | Hospital Admissions Length (administrative)                          | Hospital Admission Number (administrative)                                       | Quality of Care Questionnaire       | Hospital Bed Occupancy (administrative) |                                                                      |                     |                                       |
| Hudon, C., et al. (2015)            | 1 |   |   |  | 1 | 0 | To optimise health care coordination and reduce health service use.             | Focus groups with families of patients to explore service experience | Semi-structured, in-depth interviews with patients to explore service experience |                                     |                                         |                                                                      |                     |                                       |

|                   |   |   |   |   |                                                                                                                                                                                                                                                                                                                                                                                                                                        |                                            |                                                              |                                       |                                  |                       |                               |                                     |
|-------------------|---|---|---|---|----------------------------------------------------------------------------------------------------------------------------------------------------------------------------------------------------------------------------------------------------------------------------------------------------------------------------------------------------------------------------------------------------------------------------------------|--------------------------------------------|--------------------------------------------------------------|---------------------------------------|----------------------------------|-----------------------|-------------------------------|-------------------------------------|
| Huxley, P. (1997) | 1 | 1 | 2 | 1 | <p>To increase the level of mental well-being of participants using a wide range of creative processes'. Other aims to provide arts opportunities, recommend appropriate arts activities, raise self-esteem/self-confidence, to 'encourage individuals to look after their own health by developing skills in self-assessment and making choices' and to 'encourage participants to take up further arts/leisure activities'. Pg 5</p> | Activities, interests and hobbies question | Contact with other health professionals in the last 3 months | Contacts with GP in the last 3 months | General Health Questionnaire -12 | Self-concept question | Social relationships question | Unknown qualitative response method |
|-------------------|---|---|---|---|----------------------------------------------------------------------------------------------------------------------------------------------------------------------------------------------------------------------------------------------------------------------------------------------------------------------------------------------------------------------------------------------------------------------------------------|--------------------------------------------|--------------------------------------------------------------|---------------------------------------|----------------------------------|-----------------------|-------------------------------|-------------------------------------|



|                                                                     |   |   |   |   |  |   |   |                                                                                                                     |                                                      |                                                                       |                                                  |                                    |                         |                             |                                                  |                                                |  |  |
|---------------------------------------------------------------------|---|---|---|---|--|---|---|---------------------------------------------------------------------------------------------------------------------|------------------------------------------------------|-----------------------------------------------------------------------|--------------------------------------------------|------------------------------------|-------------------------|-----------------------------|--------------------------------------------------|------------------------------------------------|--|--|
| Innovation Unit (2016)                                              | 1 | 1 | 1 | 1 |  | 4 | 1 | To improve health and wellbeing and reduce primary / acute care use through connections to community-based support. | Health Service Data Counts (administrative)          | Semi-structured interviews with clients to explore service experience | Short case description of participant experience |                                    |                         |                             |                                                  |                                                |  |  |
| Innovation Unit and Greater Manchester Public Health Network (2016) |   |   |   |   |  |   |   | Not Listed.                                                                                                         | Interviews with practitioners about patient progress | Warwick-Edinburgh Mental Wellbeing Scale                              |                                                  |                                    |                         |                             |                                                  |                                                |  |  |
| Jones, M., et al. (2013)                                            | 1 | 1 | 1 |   |  | 3 | 0 | To improve physical and mental health and social wellbeing.                                                         | Centre for Epidemiological Studies Depression Scale  | Demographic questions                                                 | General Health Likert Scale                      | GP Physical Activity Questionnaire | Health Eating Questions | Life satisfaction Questions | Social Wellbeing Scale (European Survey Round 3) | Warwick-Edinburgh Mental Wellbeing Short Scale |  |  |

|                                    |   |   |                                             |   |   |                                                                                                                                                                                     |                                                        |                                       |                                                  |                                                         |                                                  |                              |                       |                                      |
|------------------------------------|---|---|---------------------------------------------|---|---|-------------------------------------------------------------------------------------------------------------------------------------------------------------------------------------|--------------------------------------------------------|---------------------------------------|--------------------------------------------------|---------------------------------------------------------|--------------------------------------------------|------------------------------|-----------------------|--------------------------------------|
| Kilroy, A., et al. (2007)          | 1 | 1 | 1 (Community Wellbeing and Quality of Life) | 3 | 1 | (Various programmes) To empower/support individuals to choose a healthier lifestyle. And to create a sense of well-being/transform quality of life for communities and individuals. | General Health Questionnaire -12                       | Hospital Anxiety and Depression Scale | Ryff's Scale of Psychological Well Being         | Semi-structured interviews about participant experience | Warr, Cook & Wall Work and Life Attitudes Survey |                              |                       |                                      |
| Kimberlee, R., et al. (2014)       | 1 | 1 | 1                                           | 3 | 1 | To improve wellbeing (mental, spiritual and physical) and reduce health service cost.                                                                                               | Friendship Scale for Isolation                         | GAD7 Anxiety Scale                    | GP Visit Rate (administrative)                   | International Physical Activity Questionnaire           | ONS Wellbeing Measures                           | Perceived Economic Wellbeing | PHQ9 Depression Scale | Social Return on Investment Analysis |
| Lee, K.-H. and L. Davenport (2006) |   | 1 | 1                                           | 2 | 1 | To reduce the number of emergency department visits and improve patient health.                                                                                                     | Emergency Department Number of Visits (administrative) |                                       |                                                  |                                                         |                                                  |                              |                       |                                      |
| Liao, M.-C., et al. (2012)         |   | 1 | 1                                           | 2 | 1 | To reduce emergency department use and improve health through targeted care.                                                                                                        | Emergency department use (administrative)              |                                       | Short case description of participant experience |                                                         |                                                  |                              |                       |                                      |

|                                                    |   |   |                        |   |   |                                                                                        |                             |                                                                                                                 |                                                        |                                               |
|----------------------------------------------------|---|---|------------------------|---|---|----------------------------------------------------------------------------------------|-----------------------------|-----------------------------------------------------------------------------------------------------------------|--------------------------------------------------------|-----------------------------------------------|
| Maughan, D. L., et al. (2016)                      | 1 | 1 | 1 (Environmental Cost) | 2 | 0 | To reduce healthcare service use and the subsequent financial and environmental costs. | Cost analysis               | Number of GP Appointments (administrative)                                                                      | Prescription (psychotropic)<br>Number (administrative) | Secondary Referral<br>Number (administrative) |
| Morton, L., et al. (2015)                          | 1 |   |                        | 1 | 0 | To improve mental wellbeing.                                                           | General Self-efficacy Scale | Hospital Anxiety and Depression Scale                                                                           | Warwick-Edinburgh Mental Well-being Scale              |                                               |
| Newcastle West Clinical Commissioning Group (2014) | 1 | 1 |                        | 2 | 1 | To improve general wellbeing and reduce health service use.                            | Cost Analysis               | Focus Groups with potential or previous patients to explore perceptions and expectations of social prescription |                                                        |                                               |

|                               |   |   |   |   |                             |   |   |                                                                                                                                             |                                                  |                                                  |                                             |                                                                                                          |                                  |                                               |
|-------------------------------|---|---|---|---|-----------------------------|---|---|---------------------------------------------------------------------------------------------------------------------------------------------|--------------------------------------------------|--------------------------------------------------|---------------------------------------------|----------------------------------------------------------------------------------------------------------|----------------------------------|-----------------------------------------------|
| Okin, R. L., et al. (2000)    | 1 | 1 | 1 | 1 |                             | 4 | 1 | To reduce the use of acute hospital services and service cost, and reduce the psychosocial problems of frequent emergency department users. | Case Manager reported drug or alcohol problems   | Cost analysis                                    | Homelessness Status                         | Number of Emergency Department Visits (administrative)                                                   |                                  |                                               |
| Ramsbottom, H., et al. (n.d.) | 1 | 1 |   |   | 1 (Employment and training) | 2 | 0 | To support people aged 55 and over with their social, emotional and practical needs.                                                        | Short case description of participant experience | Warwick-Edinburgh Mental Well-being Scale        |                                             |                                                                                                          |                                  |                                               |
| Reinius, P., et al. (2013)    | 1 |   | 1 |   |                             | 2 | 1 | To improve self-assessed health and reduce health service use among frequent emergency department users.                                    | Length of Stay in Hospital (administrative)      | Number of doctors' appointments (administrative) | Number of hospitalisations (administrative) | Quantitative analysis of structured interview with patients to assess baseline social and medical status | Short-Form Health Survey (SF-36) | Total emergency health costs (administrative) |

|                                             |   |   |   |                                                                            |                                                                                                                         |                                                                                       |                                                                         |
|---------------------------------------------|---|---|---|----------------------------------------------------------------------------|-------------------------------------------------------------------------------------------------------------------------|---------------------------------------------------------------------------------------|-------------------------------------------------------------------------|
| Skinne<br>r, J., et<br>al.<br>(2009)        | 1 | 1 | 0 | To reduce<br>emergency<br>department<br>visits among<br>frequent<br>users. | Numbe<br>r of<br>Emerg<br>ency<br>Depart<br>ment<br>Admiss<br>ions<br>(admin<br>istrativ<br>e)                          | Unspec<br>ified<br>case<br>records<br>(referra<br>l type)<br>(admin<br>istrativ<br>e) | Unspec<br>ified<br>diagno<br>stic<br>detail<br>(admin<br>istrativ<br>e) |
| South,<br>J., et<br>al.<br>(2008)           | 1 | 1 | 0 | To broaden<br>health<br>service<br>provision in<br>the<br>community.       | Short<br>case<br>descrip<br>tion of<br>particip<br>ant<br>experie<br>nce<br>based<br>on<br>interview.                   |                                                                                       |                                                                         |
| Stickle<br>y, T.<br>and A.<br>Hui<br>(2012) | 1 | 1 | 0 | To improve<br>mental<br>health.                                            | Semi-<br>structur<br>ed, in-<br>depth<br>interviews<br>with<br>patients<br>using<br>Narrati<br>ve<br>Inquiry<br>Process |                                                                                       |                                                                         |

|                                               |   |   |  |   |   |                                                                         |                                                                                                                         |                                                                        |                                                                                                                   |                                                                                                     |                                                                                          |                           |                                                                   |                                       |                              |                                        |  |  |  |
|-----------------------------------------------|---|---|--|---|---|-------------------------------------------------------------------------|-------------------------------------------------------------------------------------------------------------------------|------------------------------------------------------------------------|-------------------------------------------------------------------------------------------------------------------|-----------------------------------------------------------------------------------------------------|------------------------------------------------------------------------------------------|---------------------------|-------------------------------------------------------------------|---------------------------------------|------------------------------|----------------------------------------|--|--|--|
| Stickle<br>y, T.<br>and M.<br>Eades<br>(2013) | 1 | 1 |  | 2 | 0 | To create<br>positive<br>mental health<br>and<br>wellbeing<br>outcomes. | Semi-<br>structur<br>ed<br>Intervi<br>ew<br>with<br>particip<br>ants to<br>explore<br>particip<br>ant<br>experie<br>nce |                                                                        |                                                                                                                   |                                                                                                     |                                                                                          |                           |                                                                   |                                       |                              |                                        |  |  |  |
| Tadros<br>, A. S.,<br>et al.<br>(2012)        |   | 1 |  | 1 | 0 | To reduce<br>emergency<br>medical<br>services and<br>hospital use.      | EMS<br>Dispatc<br>h<br>Respon<br>se and<br>Transp<br>ort<br>Codes                                                       | EMS<br>Presenc<br>e of<br>Comor<br>bidities<br>(admini<br>strativ<br>) | Most<br>commo<br>n<br>health<br>complai<br>nt for<br>enrolle<br>d<br>partici<br>pants<br>(admini<br>strativ<br>e) | Resour<br>ce<br>Access<br>Progra<br>mme<br>Record<br>ed<br>Activit<br>y<br>(admini<br>strativ<br>e) | Time<br>and<br>Cost of<br>Health<br>Care<br>Resour<br>ce Use<br>(admini<br>strativ<br>e) |                           |                                                                   |                                       |                              |                                        |  |  |  |
| The<br>Care<br>Forum<br>(2015)                | 1 |   |  | 1 | 0 | To improve<br>wellbeing.                                                | Demog<br>raphics<br>Analys<br>is                                                                                        | Detaile<br>d Case<br>Studies                                           | Five<br>Ways<br>to<br>Wellbe<br>ing                                                                               | Make<br>Yourse<br>lf<br>Medica<br>l<br>Outco<br>me<br>Profile                                       | Numbe<br>r of<br>Activit<br>ies<br>Undert<br>aken                                        | Reason<br>for<br>referral | Warwi<br>ck-<br>Edinbu<br>rgh<br>Mental<br>Wellbe<br>ing<br>Scale | Well<br>being<br>Outc<br>omes<br>Star | Referr<br>ed<br>Activi<br>ty | Total<br>numbe<br>r of GP<br>referrals |  |  |  |

|                                     |   |   |  |   |   |                                                                                                                                                                         |                                                                                     |                                                                       |                                                                              |                                                                                                  |
|-------------------------------------|---|---|--|---|---|-------------------------------------------------------------------------------------------------------------------------------------------------------------------------|-------------------------------------------------------------------------------------|-----------------------------------------------------------------------|------------------------------------------------------------------------------|--------------------------------------------------------------------------------------------------|
| Vogelpoel, N. and K. Jarrold (2014) | 1 | 1 |  | 2 | 0 | To improve health and social wellbeing.                                                                                                                                 | Detailed case studies to explore participant experience (Dynamic Observation scale) | Warwick-Edinburgh Mental Wellbeing Scale (14 and 7 item)              |                                                                              |                                                                                                  |
| White, Kinsella, & South (2010)     | 1 | 1 |  | 2 | 1 | To support patients with social needs (Study Aim to examine if patients make more appropriate use of GP practice after referral, unclear if this is also programme aim) | Detailed Case Studies                                                               | Single-item question on whether patients made progress on their goals | Structured telephone interview about patient views on service.               |                                                                                                  |
| White, M. and E. Salamon (2010)     | 1 | 1 |  | 2 | 0 | To improve resilience, confidence, and self-esteem.                                                                                                                     | Content analysis of participant evaluation forms                                    | Review of participant demographic characteristics                     | Semi-structured participant focus groups to explore participant experiences. | Semi-structured telephone interviews to explore participant experience. Two written testimonials |

|                                 |   |   |    |   |   |   |  |    |
|---------------------------------|---|---|----|---|---|---|--|----|
| Total Number of Articles by Aim | 2 | 1 | 21 | 2 | 6 | 4 |  | 19 |
|---------------------------------|---|---|----|---|---|---|--|----|

\*Where 1 indicates the study aimed to address both a system and individual level aim.
